# Supplementary material for: Few Open Access Journals are Plan S Compliant
Source: Preprints.org preprint supplement (doi:10.20944/preprints201901.0165.v3), 2019-01-22
Supplement: Supplementary file 1 [file supplementary]

## Sheet: Original data
Journal title	Journal URL	Alternative title	Journal ISSN (print version)	Journal EISSN (online version)	Publisher	Society or institution	Platform, host or aggregator	Country of publisher	Journal article processing charges (APCs)	APC information URL	APC amount	Currency	Journal article submission fee	Submission fee URL	Submission fee amount	Submission fee currency	Number of articles publish in the last calendar year	Number of articles information URL	Journal waiver policy (for developing country authors etc)	Waiver policy information URL	Digital archiving policy or program(s)	Archiving: national library	Archiving: other	Archiving infomation URL	Journal full-text crawl permission	Permanent article identifiers	Journal provides download statistics	Download statistics information URL	First calendar year journal provided online Open Access content	Full text formats	Keywords	Full text language	URL for the Editorial Board page	Review process	Review process information URL	URL for journal's aims & scope	URL for journal's instructions for authors	Journal plagiarism screening policy	Plagiarism information URL	Average number of weeks between submission and publication	URL for journal's Open Access statement	Machine-readable CC licensing information embedded or displayed in articles	URL to an example page with embedded licensing information	Journal license	License attributes	URL for license terms	Does this journal allow unrestricted reuse in compliance with BOAI?	Deposit policy directory	Author holds copyright without restrictions
Revista de Microbiologia	http://www.scielo.br/scielo.php/script_sci_serial/pid_0001-3714/lng_pt/nrm_iso	Journal of the Brazilian Society for Microbiology	0001-3714	1678-9881	Sociedade Brasileira de Microbiologia		SciELO Brazil	Brazil	No Information																				1998		agricultural sciences, biological sciences	ENGLISH
Anais da Academia Brasileira de Ciências	http://www.scielo.br/scielo.php?script=sci_serial&pid=0001-3765&lng=en&nrm=iso	Annals of the Brazilian Academy of Sciences	0001-3765	1678-2690	Academia Brasileira de Ciências		SciELO Brazil	Brazil	No	http://www.scielo.br/revistas/aabc/iinstruc.htm				http://www.scielo.br/revistas/aabc/iinstruc.htm											Yes	DOI			2000	PDF, HTML, XML	biological sciences, exact and earth sciences, health sciences	English	http://www.scielo.br/revistas/aabc/iedboard.htm	Peer review	http://www.scielo.br/revistas/aabc/iinstruc.htm	http://www.scielo.br/revistas/aabc/iaboutj.htm	http://www.scielo.br/revistas/aabc/iinstruc.htm	Yes	http://www.scielo.br/revistas/aabc/iinstruc.htm	18	http://www.scielo.br/revistas/aabc/isubscrp.htm	Yes	http://www.scielo.br/scielo.php?script=sci_arttext&pid=S0001-37652015000401505&lng=en&nrm=iso&tlng=en	CC BY		http://www.scielo.br/revistas/aabc/iaboutj.htm	Yes		False
ACME	http://riviste.unimi.it/index.php/ACME		0001-494X	2282-0035	Università degli Studi di Milano		OJS	Italy	No													Italian National Library (BNCF)		http://www.depositolegale.it/	Yes	DOI, NBN		they are only for the site manager	2014	PDF	Italian literature, classic literature, linguistics, philosophy	Italian	http://riviste.unimi.it/index.php/ACME/about/editorialTeam	Blind peer review	http://riviste.unimi.it/index.php/ACME/about/editorialPolicies#peerReviewProcess	http://riviste.unimi.it/index.php/ACME/about/editorialPolicies#focusAndScope	http://riviste.unimi.it/index.php/ACME/about/submissions#authorGuidelines			12	http://riviste.unimi.it/index.php/ACME/about/editorialPolicies#openAccessPolicy	Yes	http://riviste.unimi.it/index.php/ACME/article/view/4280	CC BY-NC-ND		http://riviste.unimi.it/index.php/ACME/index	Yes		True
Acta Dermato-Venereologica	http://www.medicaljournals.se/acta		0001-5555	1651-2057	Society for Publication of Acta Dermato-Venereologica		Society for Publication of Acta Dermato-Venereologica	Sweden	Yes	https://www.medicaljournals.se/acta/instructions-to-author	1600	EUR - Euro	Yes	https://www.medicaljournals.se/acta/instructions-to-author	100	EUR - Euro								http://www.ingentaconnect.com/publisher/claiming/resource/mjl/adv		DOI			1998	PDF, HTML	sexually transmitted infections, psoriasis, psychodermatology, skin immunology, skin cancer	English	https://www.medicaljournals.se/acta/editors	Peer review	https://www.medicaljournals.se/acta/instructions-to-author	http://www.medicaljournals.se/acta	https://www.medicaljournals.se/acta/instructions-to-author			20	https://www.medicaljournals.se/acta/open-access-policy			CC BY-NC		https://www.medicaljournals.se/acta/open-access-policy	Yes	Sherpa/Romeo	False
Acta Mycologica	https://pbsociety.org.pl/journals/index.php/am/index		0001-625X	2353-074X	Polish Botanical Society		OJS	Poland	Yes		100	EUR - Euro													Yes	DOI			2006	PDF	mycology, micromycetes, marcomycetes, slime moulds, symbiosis, mycopathology	English	https://pbsociety.org.pl/journals/index.php/am/about/editorialTeam	Double blind peer review	https://pbsociety.org.pl/journals/index.php/am/about/editorialPolicies#peerReviewProcess	https://pbsociety.org.pl/journals/index.php/am/about/editorialPolicies#focusAndScope	https://pbsociety.org.pl/journals/index.php/am/about/submissions#authorGuidelines	Yes	https://pbsociety.org.pl/journals/index.php/am/about/submissions#authorGuidelines	16	https://pbsociety.org.pl/journals/index.php/am/about/editorialPolicies#openAccessPolicy	Yes	https://pbsociety.org.pl/journals/index.php/am/article/view/am.2013.031	CC BY		https://pbsociety.org.pl/journals/index.php/am/about/submissions#copyrightNotice	Yes	Sherpa/Romeo	True
Acta Societatis Botanicorum Poloniae	https://pbsociety.org.pl/journals/index.php/asbp/index		0001-6977	2083-9480	Polish Botanical Society		OJS	Poland	Yes	https://pbsociety.org.pl/journals/index.php/asbp/about/submissions#authorFees	260	EUR - Euro		https://pbsociety.org.pl/journals/index.php/asbp/about/submissions#authorFees									Library of Science, maintained by the Centre for Open Science	https://pbsociety.org.pl/journals/index.php/asbp/about/editorialPolicies#custom-8	Yes	DOI			2011	PDF	botany, plant biology, plant science	English	https://pbsociety.org.pl/journals/index.php/asbp/about/editorialTeam	Double blind peer review	https://pbsociety.org.pl/journals/index.php/asbp/about/editorialPolicies#peerReviewProcess	https://pbsociety.org.pl/journals/index.php/asbp/about/editorialPolicies#focusAndScope	https://pbsociety.org.pl/journals/index.php/asbp/about/submissions#authorGuidelines	Yes	https://pbsociety.org.pl/journals/index.php/asbp/about/submissions#authorGuidelines	16	https://pbsociety.org.pl/journals/index.php/asbp/about/editorialPolicies#openAccessPolicy	Yes	https://pbsociety.org.pl/journals/index.php/asbp/article/view/asbp.2014.044	CC BY		https://pbsociety.org.pl/journals/index.php/asbp/about/submissions#copyrightNotice	Yes	Sherpa/Romeo	True
Acta Stomatologica Croatica	http://hrcak.srce.hr/index.php?show=casopis&id_casopis=6		0001-7019	1846-0410	University of Zagreb. School of Dental Medicine	Croatian dental society, Croatian medical association	Hrcak	Croatia	No	http://hrcak.srce.hr/index.php?show=casopis&id_casopis=6				http://hrcak.srce.hr/index.php?show=casopis&id_casopis=6									Hrcak	http://hrcak.srce.hr/index.php?show=casopis&id_casopis=6	Yes	DOI			1966	PDF	dentistry, odontology, oral health	Croatian, English	http://www.ascro.hr/index.php?id=61	Double blind peer review	http://hrcak.srce.hr/index.php?show=casopis&id_casopis=6	http://hrcak.srce.hr/upute/upute_autorima_Acta_stomatologica_Croatica.pdf	http://hrcak.srce.hr/upute/upute_autorima_Acta_stomatologica_Croatica.pdf			12	http://hrcak.srce.hr/index.php?show=casopis&id_casopis=6			CC BY-NC-ND		http://hrcak.srce.hr/index.php?show=casopis&id_casopis=6	Yes		False
Acta Veterinaria Brno	http://actavet.vfu.cz/		0001-7213	1801-7576	University of Veterinary and Pharmaceutical Sciences, Brno		University of Veterinary and Pharmaceutical Sciences in Brno, Czech Republic	Czech Republic	Yes	http://actavet.vfu.cz/guidelines.html	8000	CZK - Czech Koruna		http://actavet.vfu.cz/guidelines.html															1978	PDF	veterinary medicine, food hygiene, ecology, animal welfare, animal nutrition	English	http://actavet.vfu.cz/board.html	Blind peer review	http://actavet.vfu.cz/guidelines.html	http://actavet.vfu.cz/	http://actavet.vfu.cz/guidelines.html			7	http://actavet.vfu.cz/			CC BY		http://actavet.vfu.cz/	Yes		False
Africa Spectrum	http://hup.sub.uni-hamburg.de/giga/afsp		0002-0397	1868-6869	German Institute of Global and Area Studies (GIGA)		OJS	Germany	No	https://journals.sub.uni-hamburg.de/giga/afsp/about/editorialPolicies#focusAndScope				https://journals.sub.uni-hamburg.de/giga/afsp/about/editorialPolicies#focusAndScope								Deutsche Nationalbibliothek		http://d-nb.info/991346203	Yes	URN	Yes	http://journals.sub.uni-hamburg.de/giga/afsp/about/statisticsOverview	2009	PDF	Africa, politics, social science, culture, economics	English	http://journals.sub.uni-hamburg.de/giga/afsp/about/editorialTeam	Double blind peer review	http://journals.sub.uni-hamburg.de/giga/afsp/about/editorialPolicies#peerReviewProcess	http://journals.sub.uni-hamburg.de/giga/afsp/about/editorialPolicies#focusAndScope	http://journals.giga-hamburg.de/index.php/afsp/about/submissions			20	http://journals.sub.uni-hamburg.de/giga/afsp/about/editorialPolicies#openAccessPolicy			CC BY-ND		http://journals.giga-hamburg.de/index.php/afsp/about/submissions#copyrightNotice	Yes		True
Revista Alergia México	http://revistaalergia.mx/ojs/index.php/ram		0002-5151	2448-9190	Colegio Mexicano de Inmunología Clínica y Alergia, A.C.	Colegio Mexicano de Inmunología Clínica y Alergia, A.C.	OJS	Mexico	No	http://revistaalergia.mx/ojs/index.php/ram/about/editorialPolicies#custom-2				http://revistaalergia.mx/ojs/index.php/ram/about/editorialPolicies#custom-2											Yes				2014	PDF, HTML	clinical inmunology, clinical allergy, clinical research	Spanish; Castilian	http://revistaalergia.mx/ojs/index.php/ram/about/editorialTeam	Double blind peer review	http://revistaalergia.mx/ojs/index.php/ram/about/editorialPolicies#peerReviewProcess	http://revistaalergia.mx/ojs/index.php/ram/about/editorialPolicies#focusAndScope	http://revistaalergia.mx/ojs/index.php/ram/about/submissions#authorGuidelines			16	http://revistaalergia.mx/ojs/index.php/ram/about/editorialPolicies#openAccessPolicy	Yes	http://revistaalergia.mx/ojs/index.php/ram/article/view/185/425	CC BY-NC		http://revistaalergia.mx/ojs/index.php/ram/about/editorialPolicies#focusAndScope	Yes	Sherpa/Romeo	False
Alfa: Revista de Lingüística	http://www.scielo.br/scielo.php?script=sci_serial&pid=1981-5794&lng=en&nrm=iso	Alfa	0002-5216	1981-5794	Universidade Estadual Paulista Júlio de Mesquita Filho	Universidade Estadual Paulista	SciELO Brazil	Brazil	No	http://www.scielo.br/revistas/alfa/iaboutj.htm				http://www.scielo.br/revistas/alfa/iaboutj.htm											Yes	DOI	Yes	http://www.scielo.br/statjournal.php?lang=en&issn=1981-5794	2011	PDF, HTML, XML	linguistics, language, communication, speech	English, French, Italian, Portuguese, Spanish; Castilian	http://www.scielo.br/revistas/alfa/iedboard.htm	Peer review	http://www.scielo.br/revistas/alfa/iinstruc.htm	http://www.scielo.br/revistas/alfa/paboutj.htm	http://www.scielo.br/revistas/alfa/iinstruc.htm		http://www.scielo.br/revistas/alfa/iinstruc.htm	23	http://www.scielo.br/revistas/alfa/iinstruc.htm	Yes	http://www.scielo.br/scielo.php?script=sci_arttext&pid=S1981-57942015000200255&lng=en&nrm=iso&tlng=en	CC BY		http://www.scielo.br/revistas/alfa/iaboutj.htm	Yes		False
Anali Pravnog Fakulteta u Beogradu	http://scindeks.ceon.rs/journalDetails.aspx?issn=0003-2565&lang=en		0003-2565	2406-2693	University of Belgrade, Faculty of Law, Belgrade, Serbia		SCIndeks: Serbian Citation Index	Serbia	No	http://scindeks.ceon.rs/PublicationPolicy.aspx?issn=0003-2565&lang=en#ppAC				http://scindeks.ceon.rs/PublicationPolicy.aspx?issn=0003-2565&lang=en#ppAC								National Library of Serbia		http://scindeks.ceon.rs/Portrait.aspx?issn=0003-2565	Yes	DOI			2014	PDF	International law, law, civil law, criminal law, public law, international law	English	http://scindeks.ceon.rs/EditorialBoard.aspx?issn=0003-2565&lang=en	Double blind peer review	http://scindeks.ceon.rs/PublicationPolicy.aspx?issn=0003-2565&lang=en#ppRT	http://scindeks.ceon.rs/Portrait.aspx?issn=0003-2565&lang=en	http://scindeks.ceon.rs/InstructionForAuthors.aspx?issn=0003-2565&lang=en			3	http://scindeks.ceon.rs/PublicationPolicy.aspx?issn=0003-2565&lang=en#ppOA			CC BY		http://scindeks.ceon.rs/PublicationPolicy.aspx?issn=0003-2565&lang=en#ppLC	Yes		True
Análise Social	http://analisesocial.ics.ul.pt/		0003-2573	2182-2999	Instituto de Ciências Sociais da Universidade de Lisboa	Instituto de Ciências Sociais da Universidade de Lisboa	SciELO Portugal	Portugal	No	http://analisesocial.ics.ul.pt/?page_id=30				http://analisesocial.ics.ul.pt/?page_id=30							LOCKSS			https://thekeepers.org/purl/issn/0003-2573	Yes				2008	PDF	sociology, social conditions, political science, history	English, Portuguese	http://analisesocial.ics.ul.pt/	Double blind peer review	http://analisesocial.ics.ul.pt/?page_id=402&lang=en	http://analisesocial.ics.ul.pt/?lang=en	http://analisesocial.ics.ul.pt/?page_id=402&lang=en			40	http://analisesocial.ics.ul.pt/			CC BY		http://analisesocial.ics.ul.pt/	Yes	Sherpa/Romeo	False
Angle Orthodontist	http://www.angleorthodontist.org/anglonline/?request=index-html		0003-3219		E.H Angle Education and Research Foundation	Edward H.Angle Society of Orthodontists		United States	No	http://angle.org/page/submit?code=angf-site				http://angle.org/page/submit?code=angf-site											Yes	DOI			2004	PDF, HTML	odontology, dentistry, orthodontics	English	http://www.angle.org/page/editorial-board?code=angf-site	Double blind peer review	http://www.angle.org/page/submit	http://www.angle.org/page/submit	http://www.angle.org/page/submit	Yes	http://www.angle.org/page/submit	45	http://angle.org/page/submit?code=angf-site			Publisher's own license	Attribution, No Commercial Usage	http://angle.org/page/submit?code=angf-site	Yes		False
Archives Animal Breeding	http://www.archives-animal-breeding.net/	Archiv Tierzucht	0003-9438		Copernicus Publications	Leibniz Institute for Farm Animal Biology	Copernicus Publications	Germany	No	http://archives-animal-breeding.net/for_authors/article_processing_charges.html				http://archives-animal-breeding.net/for_authors/article_processing_charges.html					Yes	http://publications.copernicus.org/for_authors/financial_support.html	CLOCKSS, Portico			http://archives-animal-breeding.net/index.html	Yes	DOI	Yes	http://archives-animal-breeding.net/about/article_level_metrics.html	1999	PDF, XML	breeding value, DNA markers, animal husbandry, livestock physiology, animal behaviour, animal nutrition	English	http://archives-animal-breeding.net/editorial_and_advisory_board.html	Peer review	http://archives-animal-breeding.net/peer_review/review_process.html	http://archives-animal-breeding.net/about/aims_and_scope.html	http://archives-animal-breeding.net/for_authors/manuscript_preparation.html	Yes	http://archives-animal-breeding.net/for_authors/plagiarism_detection.html	13	http://archives-animal-breeding.net/about/publication_policy.html	Yes	http://www.arch-anim-breed.net/58/7/2015/aab-58-7-2015.xml	CC BY		http://archives-animal-breeding.net/about/licence_and_copyright.html	Yes	Sherpa/Romeo	True
Archivo Español de Arte	http://xn--archivoespaoldearte-53b.revistas.csic.es/index.php/aea/index		0004-0428	1988-8511	Consejo Superior de Investigaciones Científicas		OJS	Spain	No	http://xn--archivoespaoldearte-53b.revistas.csic.es/index.php/aea/about/editorialPolicies#openAccessPolicy				http://xn--archivoespaoldearte-53b.revistas.csic.es/index.php/aea/about/editorialPolicies#openAccessPolicy												DOI			1996	PDF	Spanish cultural heritage, art theory, art criticism	English, Spanish; Castilian	http://xn--archivoespaoldearte-53b.revistas.csic.es/index.php/aea/about/editorialTeam	Double blind peer review	http://archivoespañoldearte.revistas.csic.es/index.php/aea/about/editorialPolicies#peerReviewProcess	http://archivoespañoldearte.revistas.csic.es/index.php/aea/about/editorialPolicies#focusAndScope	http://archivoespañoldearte.revistas.csic.es/index.php/aea/about/submissions#authorGuidelines			48	http://archivoespañoldearte.revistas.csic.es/index.php/aea/about/editorialPolicies#openAccessPolicy			CC BY-NC		http://xn--archivoespaoldearte-53b.revistas.csic.es/index.php/aea/index	Yes		False
Archivos de Zootecnia	http://www.uco.es/organiza/servicios/publica/az/az.htm		0004-0592	1885-4494	Universidad de Córdoba			Spain	No	http://www.uco.es/organiza/servicios/publica/az/az.htm				http://www.uco.es/organiza/servicios/publica/az/az.htm											Yes				1975	PDF	zootechnics, genetics, ethnology, reproduction, economy, animal nutrition	English, French, Italian, Portuguese, Spanish; Castilian	http://www.uco.es/organiza/servicios/publica/az/az.htm	Double blind peer review	http://www.uco.es/organiza/servicios/publica/az/az.htm	http://www.uco.es/organiza/servicios/publica/az/az.htm	http://www.uco.es/organiza/servicios/publica/az/az.htm			43	http://www.uco.es/organiza/servicios/publica/az/az.htm			CC BY-SA		http://www.uco.es/organiza/servicios/publica/az/az.htm	Yes		True
Arhiv za farmaciju	https://scindeks.ceon.rs/journaldetails.aspx?issn=0004-1963		0004-1963	2217-8767	Pharmaceutical Association of Serbia, Belgrade, Serbia		SCIndeks: Serbian Citation Index	Serbia	No	https://scindeks.ceon.rs/PublicationPolicy.aspx?issn=0004-1963&amp;lang=en#ppAC				https://scindeks.ceon.rs/PublicationPolicy.aspx?issn=0004-1963&amp;lang=en#ppAC								National Library of Serbia		https://scindeks.ceon.rs/Portrait.aspx?issn=0004-1963	Yes	DOI	Yes	https://scindeks.ceon.rs/article.aspx?query=ISSID%26and%2613740&page=0&sort=8&stype=0&backurl=%2fissue.aspx%3fissue%3d13740	2014	PDF	pharmacy, medicines, community pharmacy, hospital pharmacy	Serbian	https://scindeks.ceon.rs/EditorialBoard.aspx?issn=0004-1963&amp;lang=en	Blind peer review	https://scindeks.ceon.rs/PublicationPolicy.aspx?issn=0004-1963&amp;lang=en#ppRT	https://scindeks.ceon.rs/Portrait.aspx?issn=0004-1963	https://scindeks-clanci.ceon.rs/data/uputstva/0004-1963ue.pdf			12	https://scindeks.ceon.rs/PublicationPolicy.aspx?issn=0004-1963&amp;lang=en#ppOA	Yes	https://scindeks.ceon.rs/article.aspx?artid=0004-19631706333T	CC BY-SA		http://scindeks.ceon.rs/PublicationPolicy.aspx?issn=0004-1963&amp;lang=en#ppLC	Yes		True
Arquivos Brasileiros de Oftalmologia	http://www.scielo.br/scielo.php?script=sci_serial&pid=0004-2749&lng=en&nrm=iso		0004-2749	1678-2925	Conselho Brasileiro de Oftalmologia	órgão oficial do Conselho Brasileiro de Oftalmologia	SciELO Brazil	Brazil	Yes	http://www.scielo.br/revistas/abo/iinstruc.htm	500	BRL - Brazilian Real		http://www.scielo.br/revistas/abo/iinstruc.htm										http://www.scielo.br/revistas/abo/iinstruc.htm	Yes	DOI	Yes	http://www.scielo.br/statjournal.php?lang=pt&issn=0004-2749	2001	PDF, HTML, XML	health sciences, ophthalmology	English	http://www.scielo.br/revistas/abo/iedboard.htm	Blind peer review	http://www.scielo.br/revistas/abo/iinstruc.htm	http://www.scielo.br/revistas/abo/iinstruc.htm	http://www.scielo.br/revistas/abo/iinstruc.htm		http://www.scielo.br/revistas/abo/paboutj.htm	24	http://www.scielo.br/revistas/abo/isubscrp.htm	Yes	http://www.scielo.br/scielo.php?script=sci_arttext&pid=S0004-27492015000300003&lng=en&nrm=iso&tlng=en	CC BY		http://www.scielo.br/revistas/abo/paboutj.htm	Yes		False
Arquivos de Gastroenterologia	http://www.scielo.br/scielo.php?script=sci_serial&pid=0004-2803&lng=en&nrm=iso	Archives of Gastroenterology	0004-2803	1678-4219	Instituto Brasileiro de Estudos e Pesquisas de Gastroenterologia (IBEPEGE)		SciELO Brazil	Brazil	No	http://www.scielo.br/revistas/ag/iinstruc.htm#001				http://www.scielo.br/revistas/ag/iinstruc.htm#001										http://www.scielo.br/revistas/ag/iaboutj.htm	Yes	DOI	Yes	http://www.scielo.br/statjournal.php?lang=en&issn=0004-2803	1999	PDF, HTML, XML	health sciences, Inflammatory bowel disease, Crohn’s disease	English	http://www.scielo.br/revistas/ag/iedboard.htm	Blind peer review	http://www.scielo.br/revistas/ag/iinstruc.htm	http://www.scielo.br/revistas/ag/iinstruc.htm	http://www.scielo.br/revistas/ag/iinstruc.htm			9	http://www.scielo.br/revistas/ag/isubscrp.htm	Yes	http://www.scielo.br/scielo.php?script=sci_arttext&pid=S0004-28032015000200088&lng=en&nrm=iso&tlng=en	CC BY-NC		http://www.scielo.br/revistas/ag/iaboutj.htm	Yes		False
Arquivos de Neuro-Psiquiatria	http://www.scielo.br/scielo.php?pid=0004-282X&script=sci_serial		0004-282X	1678-4227	Academia Brasileira de Neurologia (ABNEURO)	Academia Brasileira de Neurologia (ABN)	SciELO Brazil	Brazil	No	http://www.scielo.br/revistas/anp/iinstruc.htm#003				http://www.scielo.br/revistas/anp/iinstruc.htm#003										http://www.scielo.br/revistas/anp/iaboutj.htm	Yes	DOI	Yes	http://www.scielo.br/statjournal.php?lang=en&issn=0004-282X	2000	PDF, HTML, XML	health sciences, patients with neurological diseases, training for neurologists	English	http://www.scielo.br/revistas/anp/iedboard.htm	Peer review	http://www.scielo.br/revistas/anp/iinstruc.htm	http://www.scielo.br/revistas/anp/iaboutj.htm	http://www.scielo.br/revistas/anp/iinstruc.htm		http://www.scielo.br/revistas/anp/iinstruc.htm	7	http://www.scielo.br/revistas/anp/isubscrp.htm	Yes	http://www.scielo.br/scielo.php?script=sci_arttext&pid=S0004-282X2015000800648&lng=en&nrm=iso&tlng=en	CC BY-NC		http://www.scielo.br/revistas/anp/iaboutj.htm	Yes		False
Ars Pharmaceutica	http://revistaseug.ugr.es/index.php/ars		0004-2927	2340-9894	Facultad de Farmacia, Universidad de Granada	Universidad de Granada	OJS	Spain	No	http://revistaseug.ugr.es/index.php/ars/index				http://revistaseug.ugr.es/index.php/ars/index											Yes	DOI	Yes	http://scielo.isciii.es/statjournal.php?lang=es&issn=2340-9894	2002	PDF	Pharmaceutical Technology, Chemical Pharmaceutical, Pharmacology, Pharmacy Practice, Pharmaceutical Care, Radiopharmacy	English, Spanish; Castilian	http://revistaseug.ugr.es/index.php/ars/about/editorialTeam	Peer review	http://revistaseug.ugr.es/index.php/ars/about/editorialPolicies#peerReviewProcess	http://revistaseug.ugr.es/index.php/ars/about/editorialPolicies#focusAndScope	http://revistaseug.ugr.es/index.php/ars/about/submissions#onlineSubmissions			10	http://revistaseug.ugr.es/index.php/ars/about/editorialPolicies#openAccessPolicy	Yes	http://revistaseug.ugr.es/index.php/ars/article/download/7275/6329	CC BY-NC-SA		http://revistaseug.ugr.es/index.php/ars/index	Yes	Sherpa/Romeo, Dulcinea	False
Automatika	https://www.tandfonline.com/taut	Journal for Control, Measurement, Electronics, Computing and Communications	0005-1144	1848-3380	Taylor & Francis Group	KoREMA - Croatian Society for Communications, Computing, Electronics, Measurement and Control	Taylor & Francis Online	United Kingdom	Yes	https://tandfonline.com/action/authorSubmission?journalCode=taut20&page=instructions	300	GBP - Pound Sterling		https://tandfonline.com/action/authorSubmission?journalCode=taut20&page=instructions					Yes	https://authorservices.taylorandfrancis.com/apc-discounts-and-waivers/	CLOCKSS, LOCKSS			https://librarianresources.taylorandfrancis.com/product-info/journals/title-by-title/	Yes	DOI	Yes	https://tandfonline.com/toc/taut20/59/1?nav=tocList	2001	PDF, HTML	electronics, computing, robotics, automation, control systems, communications	English	https://www.tandfonline.com/action/journalInformation?show=editorialBoard&journalCode=taut	Blind peer review	https://www.tandfonline.com/action/authorSubmission?journalCode=taut&page=instructions	https://www.tandfonline.com/action/journalInformation?show=aimsScope&journalCode=taut	https://www.tandfonline.com/action/authorSubmission?journalCode=taut20&page=instructions	Yes	https://www.tandfonline.com/action/authorSubmission?journalCode=taut20&page=instructions	42	https://www.tandfonline.com/action/journalInformation?show=aimsScope&journalCode=TAUT20	Yes	https://www.tandfonline.com/action/showCopyRight?scroll=top&doi=10.1080%2F00051144.2018.1435341	CC BY-NC		http://authorservices.taylorandfrancis.com/publishing-agreements-your-options/	Yes		False
Bibliotecas: Anales de Investigación	http://revistas.bnjm.cu/index.php/anales		0006-176X	1683-8947	Biblioteca Nacional de Cuba		OJS	Cuba	No	http://revistas.bnjm.cu/index.php/anales/about/submissions#onlineSubmissions				http://revistas.bnjm.cu/index.php/anales/about/submissions#onlineSubmissions										http://revistas.bnjm.cu/index.php/anales/about/editorialPolicies#archiving					2000	PDF	archival sciences, information science, librarianship, library and information science	English, Portuguese, Spanish; Castilian	http://revistas.bnjm.cu/index.php/anales/about/editorialTeam	Double blind peer review	http://revistas.bnjm.cu/index.php/anales/about/editorialPolicies#peerReviewProcess	http://revistas.bnjm.cu/index.php/anales/about/editorialPolicies#focusAndScope	http://revistas.bnjm.cu/index.php/anales/about/submissions#authorGuidelines			24	http://revistas.bnjm.cu/index.php/anales/about/editorialPolicies#openAccessPolicy			CC BY-NC-SA		http://revistas.bnjm.cu/index.php/anales/about/submissions#copyrightNotice	Yes		True
Bijdragen tot de Taal-, Land- en Volkenkunde	http://booksandjournals.brillonline.com/content/journals/22134379	Journal of the Humanities and Social Sciences of Southeast Asia and Oceania	0006-2294	2213-4379	BRILL	Vereniging KITLV (NL)		Netherlands	No	http://www.brill.com/publications/journals/bijdragen-tot-de-taal-land-en-volkenkunde-journal-humanities-and-social-scienc				http://www.brill.com/publications/journals/bijdragen-tot-de-taal-land-en-volkenkunde-journal-humanities-and-social-scienc							Portico			http://www.brill.com/about/policies/archival-policy	Yes	DOI			2013	PDF, HTML	linguistics, ethnology, history of Indonesia, history of Southeast Asia, languages and literature of Eastern Asia	Dutch; Flemish, English	http://www.brill.com/publications/journals/bijdragen-tot-de-taal-land-en-volkenkunde-journal-humanities-and-social-scienc#EDIBOA_1	Double blind peer review	http://www.brill.com/sites/default/files/ftp/authors_instructions/BKI.pdf	http://www.brill.com/publications/journals/bijdragen-tot-de-taal-land-en-volkenkunde-journal-humanities-and-social-scienc	http://www.brill.com/sites/default/files/ftp/authors_instructions/BKI.pdf			20	http://www.brill.com/publications/journals/bijdragen-tot-de-taal-land-en-volkenkunde-journal-humanities-and-social-scienc	Yes	http://booksandjournals.brillonline.com/content/journals/10.1163/22134379-17104001	CC BY-NC		http://www.brill.com/publications/journals/bijdragen-tot-de-taal-land-en-volkenkunde-journal-humanities-and-social-scienc	Yes	Sherpa/Romeo	False
Boletín Cultural y Bibliográfico	http://publicaciones.banrepcultural.org/index.php/boletin_cultural		0006-6184		Banco de la República	Banco de la República	OJS	Colombia	No	http://publicaciones.banrepcultural.org/index.php/boletin_cultural/about/editorialPolicies#openAccessPolicy				http://publicaciones.banrepcultural.org/index.php/boletin_cultural/about/editorialPolicies#openAccessPolicy											Yes				1958	PDF	culture, Colombian heritage, bibliography, archeology, cartography, special libraries	Spanish; Castilian	http://www.banrepcultural.org/boletin-cultural/acerca	Editorial review	http://publicaciones.banrepcultural.org/index.php/boletin_cultural/about/history	http://publicaciones.banrepcultural.org/index.php/boletin_cultural/about/history	http://www.banrepcultural.org/boletin-cultural/acerca			24	http://publicaciones.banrepcultural.org/index.php/boletin_cultural/about/editorialPolicies#openAccessPolicy			CC BY-NC-SA		http://www.banrepcultural.org/boletin-cultural/content/derechos-de-autor-y-c%C3%B3mo-citar-esta-p%C3%A1gina	Yes		False
Bothalia: African Biodiversity & Conservation	http://www.abcjournal.org		0006-8241	2311-9284	AOSIS	South African National Biodiversity Institute	OJS	South Africa	No	http://www.abcjournal.org/index.php/abc/pages/view/faq_author#3				http://www.abcjournal.org/index.php/abc/pages/view/faq_author#3							LOCKSS			http://www.abcjournal.org/index.php/abc/gateway/lockss	Yes	DOI	Yes	http://www.abcjournal.org/index.php/ABC/issue/view/6	2014	PDF, HTML, ePUB, XML	species, ecosystems, diversity, plants, biodiversity	English	http://www.abcjournal.org/index.php/abc/pages/view/editorial-team	Double blind peer review	http://www.abcjournal.org/index.php/abc/pages/view/reviewer#3	http://www.abcjournal.org/index.php/abc/pages/view/about#1	http://www.abcjournal.org/index.php/abc/pages/view/authors#2	Yes	http://www.abcjournal.org/index.php/abc/pages/view/newsubmission#4	12	http://www.abcjournal.org/index.php/abc/pages/view/about#2	Yes	http://www.abcjournal.org/index.php/ABC/article/view/90	CC BY		http://www.abcjournal.org/index.php/abc/pages/view/authors#3	Yes	Sherpa/Romeo	True
Bragantia	http://www.scielo.br/scielo.php?pid=0006-8705&script=sci_serial	Revista de Ciências Agronômicas	0006-8705	1678-4499	Instituto Agronômico de Campinas		SciELO Brazil	Brazil	Yes	http://www.scielo.br/revistas/brag/iinstruc.htm#004	50	USD - US Dollar		http://www.scielo.br/revistas/brag/iinstruc.htm										http://www.scielo.br/revistas/brag/iaboutj.htm	Yes	DOI	Yes	http://www.scielo.br/statjournal.php?lang=en&issn=0006-8705	1998	PDF, HTML, XML	agricultural sciences, seed and fiber technology	English, Portuguese	http://www.scielo.br/revistas/brag/iedboard.htm	Peer review	http://www.scielo.br/revistas/brag/iinstruc.htm	http://www.scielo.br/revistas/brag/iaboutj.htm	http://www.scielo.br/revistas/brag/iinstruc.htm			4	http://www.scielo.br/revistas/brag/isubscrp.htm	Yes	http://www.scielo.br/scielo.php?script=sci_arttext&pid=S0006-87052015000200149&lng=en&nrm=iso&tlng=en	CC BY-NC		http://www.scielo.br/revistas/brag/iaboutj.htm	Yes		False
Brodogradnja	http://www.fsb.hr/brodogradnja	Shipbuilding	0007-215X	1845-5859	Faculty of Mechanical Engineering and Naval Architecture	University of Zagreb	Hrcak	Croatia	No	http://www.fsb.unizg.hr/brodogradnja/PaperSubmission.htm				http://www.fsb.unizg.hr/brodogradnja/PaperSubmission.htm									Hrcak - Portal of scientific journals of Croatia	http://hrcak.srce.hr				http://hrcak.srce.hr	2005	PDF	shipping, offshore, naval architecture, shipbuilding	Croatian, English	http://www.fsb.unizg.hr/brodogradnja/EditorialBoard.htm	Double blind peer review	https://www.fsb.unizg.hr/brodogradnja/ReviewingProcess.htm	http://www.fsb.unizg.hr/brodogradnja/AboutBRODOGRADNJA.htm	http://www.fsb.unizg.hr/brodogradnja/PaperSubmission.htm			8	http://www.fer.unizg.hr/oa2012/declaration?_v1=Hod5Xwf8sA37HY2iTehXB_vQU4m9tccIbrJXEBLiky6UMIuZiDrOroDQ-hXL2WqZzRmh4Fn8FrVCpNiPtnCSoUkkQjqRDbfFJkKcazwFrAYC29gZ&_lid=75254			CC BY		https://www.fsb.unizg.hr/brodogradnja/	Yes	Sherpa/Romeo	True
California Agriculture	http://calag.ucanr.edu/		0008-0845	2160-8091	University of California Agriculture and Natural Resources	University of California Agriculture and Natural Resources	University of California Agriculture and Natural Resources	United States	No	http://calag.ucanr.edu/SubmitArticles/				http://calag.ucanr.edu/SubmitArticles/											Yes	DOI			1946	PDF, HTML	Agriculture, Environment, Nutrition, Forestry	English	http://calag.ucanr.edu/Associate_editors/	Double blind peer review	http://calag.ucanr.edu/About/	http://calag.ucanr.edu/About/	http://calag.ucanr.edu/SubmitArticles/			20	http://calag.ucanr.edu/About/			CC BY-NC-ND		http://calag.ucanr.edu/About/	Yes		False
Casopis pro Moderní Filologii	http://casopispromodernifilologii.ff.cuni.cz/en/	Journal for Modern Philology	0008-7386	2336-6591	Univerzita Karlova, Filozofická fakulta			Czech Republic	No	http://casopispromodernifilologii.ff.cuni.cz/en/about-journal-4/				http://casopispromodernifilologii.ff.cuni.cz/en/about-journal-4/											Yes				2015	PDF	philology, linguistics	Czech, English	http://casopispromodernifilologii.ff.cuni.cz/en/editorial-board/	Double blind peer review	http://casopispromodernifilologii.ff.cuni.cz/en/review-process/	http://casopispromodernifilologii.ff.cuni.cz/en/about-journal-4/	http://casopispromodernifilologii.ff.cuni.cz/en/guidelines/			22	http://casopispromodernifilologii.ff.cuni.cz/en/about-journal-4/			CC BY-NC-ND		http://casopispromodernifilologii.ff.cuni.cz/en/about-journal-4/	Yes		False
Catalogue and Index	http://www.cilip.org.uk/cataloguing-indexing-group/catalogue-index	Catalogue & Index	0008-7629	2399-9667	Chartered Institute of Library and Information Professionals (CILIP)	Cataloguing and Indexing Group (CIG)		United Kingdom	No	http://www.cilip.org.uk/cataloguing-indexing-group/catalogue-index/guidance-contributors				http://www.cilip.org.uk/cataloguing-indexing-group/catalogue-index/guidance-contributors															2016	PDF	Cataloguing, Metadata, Classification, Indexing, knowledge organisation	English	http://www.cilip.org.uk/cataloguing-indexing-group/catalogue-index	Editorial review	http://www.cilip.org.uk/cataloguing-indexing-group/catalogue-index/guidance-contributors	http://www.cilip.org.uk/cataloguing-indexing-group/catalogue-index	http://www.cilip.org.uk/cataloguing-indexing-group/catalogue-index/guidance-contributors			4	http://www.cilip.org.uk/cataloguing-indexing-group/catalogue-index/open-access-statement			CC BY		http://www.cilip.org.uk/cataloguing-indexing-group/catalogue-index/open-access-statement	Yes		True
Anales de la Cátedra Francisco Suárez	http://revistaseug.ugr.es/index.php/acfs	ACFS	0008-7750	2530-3716	Universidad de Granada	Departamento de Filosofía del Derecho – Facultad de Derecho	OJS	Spain	No	http://revistaseug.ugr.es/index.php/acfs/about/editorialPolicies#openAccessPolicy				http://revistaseug.ugr.es/index.php/acfs/about/editorialPolicies#openAccessPolicy											Yes				2003	PDF	Philosophy of Law, Law, Philosophy, Political Philosophy	Spanish; Castilian	http://revistaseug.ugr.es/index.php/acfs/about/editorialTeam	Blind peer review	http://revistaseug.ugr.es/index.php/acfs/about/editorialPolicies#peerReviewProcess	http://revistaseug.ugr.es/index.php/acfs/index	http://revistaseug.ugr.es/index.php/acfs/about/submissions#authorGuidelines			16	http://revistaseug.ugr.es/index.php/acfs/about/editorialPolicies#openAccessPolicy			CC BY-NC-ND		http://revistaseug.ugr.es/index.php/acfs/about/editorialPolicies#openAccessPolicy	Yes	Dulcinea	True
Ciceroniana	http://www.ojs.unito.it/index.php/COL/index		0009-6687	2532-5299	Università degli Studi di Torino	Société Internationale des Amis de Cicéron	OJS	Italy	No	http://www.ojs.unito.it/index.php/COL/about/editorialPolicies#custom-2				http://www.ojs.unito.it/index.php/COL/about/editorialPolicies#custom-2							LOCKSS			http://www.ojs.unito.it/index.php/COL/about/editorialPolicies#archiving	Yes	DOI	Yes	http://www.ojs.unito.it/index.php/COL/about/editorialPolicies#custom-0	1959	PDF	classics, Latin, Marcus Tullius Cicero, Roman thought, ancient philosophy, classical philology	English, French, German, Italian, Spanish; Castilian	http://www.ojs.unito.it/index.php/COL/about/editorialTeam	Double blind peer review	http://www.ojs.unito.it/index.php/COL/about/editorialPolicies#peerReviewProcess	http://www.ojs.unito.it/index.php/COL/about/editorialPolicies#focusAndScope	http://www.ojs.unito.it/index.php/COL/about/submissions#authorGuidelines			20	http://www.ojs.unito.it/index.php/COL/about/editorialPolicies#openAccessPolicy			CC BY-SA		http://www.ojs.unito.it/index.php/COL/article/view/2194/1933	Yes	Sherpa/Romeo	True
Ciencias Administrativas	https://revistas.unlp.edu.ar/CADM		0009-6784	2314-3738	Uiversidad Nacional de La Plata	Universidad Nacional de La Plata, Facultad de Ciencias Económicas	OJS	Argentina	No	https://revistas.unlp.edu.ar/CADM/about				https://revistas.unlp.edu.ar/CADM/about										http://revistas.unlp.edu.ar/CADM/about/submissions#onlineSubmissions	Yes				2013	PDF	administration, economics	Spanish; Castilian	https://revistas.unlp.edu.ar/CADM/about/editorialTeam	Blind peer review	https://revistas.unlp.edu.ar/CADM/about	https://revistas.unlp.edu.ar/CADM/about	https://revistas.unlp.edu.ar/CADM/about/submissions#authorGuidelines			6	https://revistas.unlp.edu.ar/CADM/about/editorialPolicies#openAccessPolicy			CC BY-NC-ND		https://revistas.unlp.edu.ar/CADM/index	Yes		True
Collectanea Botanica	http://collectaneabotanica.revistas.csic.es		0010-0730	1989-1067	Consejo Superior de Investigaciones Científicas		OJS	Spain	No	http://collectaneabotanica.revistas.csic.es/index.php/collectaneabotanica/about/editorialPolicies				http://collectaneabotanica.revistas.csic.es/index.php/collectaneabotanica/about/editorialPolicies												DOI			1988	PDF, HTML, XML	biogeography, ecology, biology, morphology, nomenclature, plant-animal relations	Catalan; Valencian, English, French, Portuguese, Spanish; Castilian	http://collectaneabotanica.revistas.csic.es/index.php/collectaneabotanica/about/editorialTeam	Blind peer review	http://collectaneabotanica.revistas.csic.es/index.php/collectaneabotanica/about/editorialPolicies#peerReviewProcess	http://collectaneabotanica.revistas.csic.es/index.php/collectaneabotanica/about/editorialPolicies#focusAndScope	http://collectaneabotanica.revistas.csic.es/index.php/collectaneabotanica/about/submissions#authorGuidelines			48	http://collectaneabotanica.revistas.csic.es/index.php/collectaneabotanica/about/editorialPolicies#openAccessPolicy			CC BY-NC		http://collectaneabotanica.revistas.csic.es/index.php/collectaneabotanica/index	Yes		False
College and Research Libraries	http://crl.acrl.org/		0010-0870	2150-6701	Association of College and Research Libraries		HighWire	United States	No	http://crl.acrl.org/site/misc/author.xhtml				http://crl.acrl.org/site/misc/author.xhtml												DOI	Yes	http://crl.acrl.org/articleusage?gca=crl;76/7/859 (sample article, these are public)	1939	PDF	library science, information literacy, higher education	English	http://crl.acrl.org/site/misc/about.xhtml	Double blind peer review	http://crl.acrl.org/site/misc/author.xhtml	http://crl.acrl.org/site/misc/author.xhtml	http://crl.acrl.org/site/misc/author.xhtml			45	http://crl.acrl.org/site/misc/about.xhtml	Yes	http://crl.acrl.org/content/77/6/682.abstract	CC BY-NC		http://crl.acrl.org/site/misc/about.xhtml	Yes		True
Crítica. Revista Hispanoamericana de Filosofía	http://critica.filosoficas.unam.mx		0011-1503	1870-4905	Instituto de Investigaciones Filosóficas, UNAM	Universidad Nacional Autónoma de México	critica.filosoficas.unam.mx	Mexico	No	http://critica.filosoficas.unam.mx/pg/es/descripcionrevista.php				http://critica.filosoficas.unam.mx/pg/es/descripcionrevista.php															1967	PDF	philosophy, analytics, logic	English, Spanish; Castilian	http://critica.filosoficas.unam.mx/pg/en/comiteeditorial.php	Double blind peer review	http://critica.filosoficas.unam.mx/pg/en/informacionautores.php	http://critica.filosoficas.unam.mx/pg/en/descripcionrevista.php	http://critica.filosoficas.unam.mx/pg/en/informacionautores.php			24	http://critica.filosoficas.unam.mx/pg/en/descripcionrevista.php			Publisher's own license	Attribution, No Commercial Usage	http://critica.filosoficas.unam.mx/pg/en/derechosyautorizaciones.php	Yes		False
Croatica Chemica Acta	http://cca.hkd.hr/		0011-1643	1334-417X	Croatian Chemical Society		Hrcak	Croatia	No	http://cca.hkd.hr/?page_id=201				http://cca.hkd.hr/?page_id=201									Common HRCAK platform for Croatian Open Access journals, managed by the University Computing Centre SRCE.	http://cca.hkd.hr/	Yes	DOI	Yes	http://hrcak.srce.hr/index.php?show=posjecenost-casopisa&lang=en	1990	PDF	chemistry, biology	English	http://cca.hkd.hr/?page_id=30	Blind peer review	http://cca.hkd.hr/?page_id=201	http://cca.hkd.hr/	http://cca.hkd.hr/?page_id=201	Yes	http://cca.hkd.hr/?page_id=201	20	http://cca.hkd.hr/?page_id=527	Yes	http://hrcak.srce.hr/index.php?show=clanak&id_clanak_jezik=222315&lang=en	CC BY		http://cca.hkd.hr/?page_id=527	Yes	Sherpa/Romeo	True
Current Therapeutic Research	http://www.journals.elsevier.com/current-therapeutic-research/		0011-393X	1879-0313	Elsevier			Netherlands	Yes	http://www.elsevier.com/journals/current-therapeutic-research/0011-393X/guide-for-authors	1200	USD - US Dollar		http://www.elsevier.com/journals/current-therapeutic-research/0011-393X/guide-for-authors							Portico	Koninklijke Bibliotheek		http://www.elsevier.com/editors/policies/independent-digital-archives		DOI			2006	PDF, HTML, ePUB	drug therapy, applied health economics	English	http://www.journals.elsevier.com/current-therapeutic-research/editorial-board/	Double blind peer review	http://www.elsevier.com/journals/current-therapeutic-research/0011-393X/guide-for-authors	http://www.journals.elsevier.com/current-therapeutic-research/	http://www.elsevier.com/journals/current-therapeutic-research/0011-393X/guide-for-authors	Yes	http://www.elsevier.com/editors/perk/plagiarism-detection	12	http://www.elsevier.com/journals/current-therapeutic-research/0011-393x/open-access-journal	Yes	http://www.sciencedirect.com/science/article/pii/S0011393X13000362	CC BY-NC-ND		http://www.elsevier.com/journals/current-therapeutic-research/0011-393x/open-access-journal	Yes	Sherpa/Romeo	True
Dados: Revista de Ciências Sociais	http://www.scielo.br/scielo.php?script=sci_serial&pid=0011-5258&lng=es&nrm=iso		0011-5258	1678-4588	Universidade do Estado do Rio de Janeiro		SciELO Brazil	Brazil	No	http://www.scielo.br/revistas/dados/iinstruc.htm#01				http://www.scielo.br/revistas/dados/iinstruc.htm#01											Yes	DOI			1996	PDF, HTML, XML	social sciences	English, French, Portuguese, Spanish; Castilian	http://www.scielo.br/revistas/dados/iedboard.htm	Peer review	http://www.scielo.br/revistas/dados/iinstruc.htm#01	http://www.scielo.br/revistas/dados/iinstruc.htm	http://www.scielo.br/revistas/dados/iinstruc.htm			10	http://www.scielo.br/revistas/dados/isubscrp.htm	Yes	http://www.scielo.br/scielo.php?script=sci_arttext&pid=S0011-52582015000200371&lng=en&nrm=iso&tlng=pt	CC BY-NC		http://www.scielo.br/revistas/dados/iaboutj.htm	Yes		False
Darwiniana	http://redalyc.org:9081/revista.oa?id=669		0011-6793	1850-1702	Instituto de Botánica Darwinion y el Museo Botánico de Córdoba	Instituto de Botánica Darwinion y el Museo Botánico de Córdoba	Redalyc	Argentina	No	http://www.ojs.darwin.edu.ar/index.php/darwiniana/index				http://www.ojs.darwin.edu.ar/index.php/darwiniana/index										http://www.ojs.darwin.edu.ar/index.php/darwiniana/about/editorialPolicies#openAccessPolicy	Yes	DOI			2012	PDF, HTML	botany, ecology, genetics, phytogeography	English, Spanish; Castilian	http://www.ojs.darwin.edu.ar/index.php/darwiniana/about/editorialTeam	Double blind peer review	http://www.ojs.darwin.edu.ar/index.php/darwiniana/about/editorialPolicies#peerReviewProcess	http://www.ojs.darwin.edu.ar/index.php/darwiniana/about/editorialPolicies#focusAndScope	http://www.ojs.darwin.edu.ar/index.php/darwiniana/about/submissions#authorGuidelines			26	http://www.ojs.darwin.edu.ar/index.php/darwiniana/about/editorialPolicies#openAccessPolicy			CC BY-NC		http://www.ojs.darwin.edu.ar/index.php/darwiniana/about/submissions#copyrightNotice	Yes		False
Deutsches Ärzteblatt	http://www.aerzteblatt.de/archiv/daetitel		0012-1207	2199-7292	Deutscher Ärzte-Verlag	German Medical Association and the National Association of Statutory Health Insurance Physicians	Deutscher Ärzte-Verlag	Germany	No	http://www.aerzteblatt.de/down.asp?id=9205				http://www.aerzteblatt.de/down.asp?id=9205							PMC/Europe PMC/PMC Canada	DIMDI		http://www.aerzteblatt.de/down.asp?id=9205	Yes	DOI	Yes	http://www.aerzteblatt.de/int/archive/article/171810/Detecting-Prostate-Cancer	1997	PDF, HTML, XML	health services research, clinical medicine	English, German	http://www.aerzteblatt.de/int/editorial-team	Peer review	http://www.aerzteblatt.de/down.asp?id=9205	http://www.aerzteblatt.de/down.asp?id=9205	http://www.aerzteblatt.de/down.asp?id=9205			40	http://www.aerzteblatt.de/down.asp?id=9205			Publisher's own license					False
Dyna	http://dyna.medellin.unal.edu.co/es/index.php		0012-7353	2346-2183	Universidad Nacional de Colombia	Universidad Nacional de Colombia, Facultad de Minas		Colombia	No	http://dyna.medellin.unal.edu.co/es/instruccionesAutores.php				http://dyna.medellin.unal.edu.co/es/instruccionesAutores.php										http:// http://dyna.medellin.unal.edu.co/en/index.php	Yes	DOI			2002	PDF, HTML	mining engineering, mineral industries, material engineering, civil engineering, electrical engineering	English, Spanish; Castilian	http://dyna.medellin.unal.edu.co/en/comiteEditorial.php	Double blind peer review	http://dyna.medellin.unal.edu.co/es/procesoArbitraje.php	http://dyna.medellin.unal.edu.co/es/planeacionEstrategica.php	http://dyna.medellin.unal.edu.co/es/instruccionesAutores.php	Yes	http://dyna.medellin.unal.edu.co/es/ediciones/185/editorial/Editorial185.pdf	24	http://dyna.medellin.unal.edu.co/en/index.php			CC BY-NC-ND		http://dyna.medellin.unal.edu.co/es/index.php	Yes	Sherpa/Romeo	False
Edda	https://www.idunn.no/edda	Nordisk Tidsskrift for Litteraturforskning	0013-0818	1500-1989	Scandinavian University Press/Universitetsforlaget	Scandinavian University Press/Universitetsforlaget and the Editors	Idunn	Norway	No	https://www.idunn.no/edda				https://www.idunn.no/edda											Yes	DOI			2017	PDF, HTML, XML	literature, Nordic literature, literary theory	Bokmål, Norwegian; Norwegian Bokmål, Danish, English, Norwegian Nynorsk; Nynorsk, Norwegian, Swedish	https://www.idunn.no/edda#editors	Double blind peer review	https://www.idunn.no/edda#about	https://www.idunn.no/edda#about	https://www.idunn.no/edda#authors			52	https://www.idunn.no/edda#rights	Yes	https://www.idunn.no/edda/2017/02/introduction	CC BY-NC		https://www.idunn.no/edda#rights	Yes	Sherpa/Romeo	True
Ekonomski Anali	http://www.ekof.bg.ac.rs/publikacije/casopisi/ekonomski-anali/	Economic Annals	0013-3264	1820-7375	Faculty of Economics, Belgrade			Serbia	No	http://www.ekof.bg.ac.rs/publikacije/casopisi/ekonomski-anali/policy/				http://www.ekof.bg.ac.rs/publikacije/casopisi/ekonomski-anali/policy/								National Library of Serbia		http://repozitorijum.nb.rs/repozitorijum.aspx?issn=0013-3264	Yes	DOI			2002	PDF	economics	English	http://www.ekof.bg.ac.rs/publikacije/casopisi/ekonomski-anali/editorial-board/	Double blind peer review	http://www.ekof.bg.ac.rs/publikacije/casopisi/ekonomski-anali/policy/	http://www.ekof.bg.ac.rs/publikacije/casopisi/ekonomski-anali	http://www.ekof.bg.ac.rs/publikacije/casopisi/ekonomski-anali/instructions			18	http://www.ekof.bg.ac.rs/publikacije/casopisi/ekonomski-anali/policy/			CC BY-NC-ND		http://www.ekof.bg.ac.rs/publikacije/casopisi/ekonomski-anali/policy/	Yes		False
Emerita	http://emerita.revistas.csic.es/index.php/emerita		0013-6662	1988-8384	Consejo Superior de Investigaciones Científicas	Consejo Superior de Investigaciones Científicas	OJS	Spain	No	http://revistas.csic.es/mas_en.html				http://revistas.csic.es/mas_en.html											Yes	DOI			1974	PDF	classical philology, linguistics, ancient history	Spanish; Castilian	http://emerita.revistas.csic.es/index.php/emerita/about/editorialTeam	Double blind peer review	http://emerita.revistas.csic.es/index.php/emerita/about/submissions#authorGuidelines	http://emerita.revistas.csic.es/index.php/emerita/about/editorialPolicies	http://emerita.revistas.csic.es/index.php/emerita/about/submissions#authorGuidelines	Yes	http://emerita.revistas.csic.es/index.php/emerita/about/editorialPolicies	48	http://emerita.revistas.csic.es/index.php/emerita/about/editorialPolicies#openAccessPolicy	Yes	http://emerita.revistas.csic.es/index.php/emerita/article/view/1114	CC BY		http://emerita.revistas.csic.es/index.php/emerita/about/submissions#copyrightNotice	Yes		False
Greek Review of Social Research	http://ejournals.epublishing.ekt.gr/index.php/ekke	?p??e???s? ?????????? ??e????	0013-9696	2241-8512	EKKE			Greece	No	http://ejournals.epublishing.ekt.gr/index.php/ekke				http://ejournals.epublishing.ekt.gr/index.php/ekke												DOI	Yes	http://ejournals.epublishing.ekt.gr/index.php/ekke/article/view/8679	1969	PDF	Social Science	Greek, Modern (1453-)	http://ejournals.epublishing.ekt.gr/index.php/ekke/about	Double blind peer review	http://ejournals.epublishing.ekt.gr/index.php/ekke/about/editorialPolicies#peerReviewProcess	http://ejournals.epublishing.ekt.gr/index.php/ekke/about/editorialPolicies#focusAndScope	http://ejournals.epublishing.ekt.gr/index.php/ekke/about/submissions#authorGuidelines			16	http://ejournals.epublishing.ekt.gr/index.php/ekke/about/editorialPolicies#openAccessPolicy	Yes	http://ejournals.epublishing.ekt.gr/index.php/ekke/rt/metadata/8617/0	CC BY-NC-SA		http://ejournals.epublishing.ekt.gr/index.php/ekke/about/submissions#copyrightNotice	Yes	Sherpa/Romeo	True
Építoanyag: Journal of Silicate Based and Composite Materials	http://en.epitoanyag.org.hu/	Építoanyag: JSBCM	0013-970X	2064-4477	Scientific Society of the Silicate Industry (SZTE)	Scientific Society of the Silicate Industry (SZTE)	EBSCO	Hungary	No	http://en.epitoanyag.org.hu/open-access				http://en.epitoanyag.org.hu/open-access								OSZK		http://ki.oszk.hu/calimera/3kotet/3kotetdigitalismegorzes.html		DOI			2013	PDF	ceramics, composites, construction materials	English, Hungarian	http://en.epitoanyag.org.hu/about-journal/editorial-board	Blind peer review	http://en.epitoanyag.org.hu/for-autors/submit-your-paper	http://en.epitoanyag.org.hu/about-journal/aims-and-scope	http://en.epitoanyag.org.hu/for-autors/instruction-for-authors			12	http://en.epitoanyag.org.hu/open-access		http://en.epitoanyag.org.hu/issues/downloadable-issues	CC BY-NC		http://en.epitoanyag.org.hu/for-autors/instruction-for-authors	Yes	Sherpa/Romeo	False
DIE ERDE: Journal of the Geographical Society of Berlin	http://www.die-erde.org		0013-9998		Gesellschaft für Erdkunde zu Berlin	Gesellschaft für Erdkunde zu Berlin	OJS	Germany	Yes		25	EUR - Euro										www.digizeitschriften.de		http://www.die-erde.org/index.php/die-erde/issue/archive	Yes	DOI			2013	PDF	geography, geosciences, earth system, spatial analysis	English	http://www.die-erde.org/index.php/die-erde/about/editorialTeam	Peer review	http://www.die-erde.org/index.php/die-erde/about/editorialPolicies#peerReviewProcess	http://www.die-erde.org/index.php/die-erde/about/editorialPolicies#focusAndScope	http://www.die-erde.org/index.php/die-erde/about/submissions#authorGuidelines	Yes	http://www.die-erde.org/index.php/die-erde/about/editorialPolicies#peerReviewProcess	30	http://www.die-erde.org/index.php/die-erde/about/editorialPolicies#openAccessPolicy			CC BY		http://www.die-erde.org/index.php/die-erde/index	Yes		True
Estudios Geográficos	http://estudiosgeograficos.revistas.csic.es/index.php/estudiosgeograficos		0014-1496	1988-8546	Consejo Superior de Investigaciones Científicas		OJS	Spain	No	http://estudiosgeograficos.revistas.csic.es/index.php/estudiosgeograficos/about/editorialPolicies				http://estudiosgeograficos.revistas.csic.es/index.php/estudiosgeograficos/about/editorialPolicies												DOI			2001	PDF	demography, sociology, ecology, cartography, GIS, remote sensing	English, Spanish; Castilian	http://estudiosgeograficos.revistas.csic.es/index.php/estudiosgeograficos/about/editorialTeam	Double blind peer review	http://estudiosgeograficos.revistas.csic.es/index.php/estudiosgeograficos/about/editorialPolicies#peerReviewProcess	http://estudiosgeograficos.revistas.csic.es/index.php/estudiosgeograficos/about/editorialPolicies#focusAndScope	http://estudiosgeograficos.revistas.csic.es/index.php/estudiosgeograficos/about/submissions#authorGuidelines			48	http://estudiosgeograficos.revistas.csic.es/index.php/estudiosgeograficos/about/editorialPolicies#openAccessPolicy			CC BY-NC		http://estudiosgeograficos.revistas.csic.es/index.php/estudiosgeograficos/index	Yes		False
Fennia: International Journal of Geography	http://ojs.tsv.fi/index.php/fennia		0015-0010	1798-5617	Geographical Society of Finland		OJS	Finland	No	http://ojs.tsv.fi/index.php/fennia/index				http://ojs.tsv.fi/index.php/fennia/index											Yes	DOI			2010	PDF	geography, physical geography, human geography	English	http://fennia.journal.fi/about/editorialTeam	Double blind peer review	http://fennia.journal.fi/about/submissions	http://fennia.journal.fi/about	http://ojs.tsv.fi/index.php/fennia/about/submissions#authorGuidelines	Yes	http://ojs.tsv.fi/index.php/fennia/about/submissions#authorGuidelines	16	http://fennia.journal.fi/about	Yes	http://ojs.tsv.fi/index.php/fennia/article/view/46331/15801	CC BY		http://ojs.tsv.fi/index.php/fennia/about/submissions#copyrightNotice	Yes		True
Florida Entomologist	http://journals.fcla.edu/flaent		0015-4040		Florida Entomological Society		Florida Entomological Society	United States	Yes	http://journals.fcla.edu/flaent/about/submissions#authorGuidelines	747	USD - US Dollar		http://journals.fcla.edu/flaent/about/submissions#authorGuidelines											Yes				1994	PDF, HTML	entomology	English	http://journals.fcla.edu/flaent/about/editorialTeam	Blind peer review	http://journals.fcla.edu/flaent/about/submissions#authorGuidelines	http://journals.fcla.edu/flaent/about	http://journals.fcla.edu/flaent/about/submissions#authorGuidelines			8	http://journals.fcla.edu/flaent/about			CC BY-NC		http://journals.fcla.edu/flaent/about/submissions#copyrightNotice	Yes		True
Fluoride	http://www.fluorideresearch.org/	Fluoride: Quarterly Journal of the International Society for Fluoride Research Inc.	0015-4725	2253-4083	International Society for Fluoride Research Inc.	International Society for Fluoride Research Inc.		New Zealand	No	http:// www.fluorideresearch.org				http://www.fluorideresearch.org											Yes				1968	PDF	fluoride toxicology, fluoride biochemistry, veterinary aspects of fluoride, clinical aspects of fluoride, agricultural aspects of fluoride, dental aspects of fluoride	Chinese, English, Japanese, Spanish; Castilian	http://www.fluorideresearch.org	Peer review	http://www.fluorideresearch.org	http://www.fluorideresearch.org	http://www.fluorideresearch.org/481/files/FJ2015_v48_n1_p090_sfs.pdf			33	http://www.fluorideresearch.org			Publisher's own license	Attribution	http://www.fluorideresearch.org	Yes		False
Genus	https://genus.springeropen.com/	Journal of Population Sciences	0016-6987	2035-5556	SpringerOpen	Università degli studi di Roma La Sapienza	SpringerOpen	United Kingdom	No	https://genus.springeropen.com/about				https://genus.springeropen.com/about							CLOCKSS, Portico	Koninklijke Bibliotheek; National Science Library, Chinese Academy of Sciences		https://www.springeropen.com/get-published/indexing-archiving-and-access-to-data/journal-archiving	Yes	DOI	Yes	https://www.springeropen.com/get-published/indexing-archiving-and-access-to-data/article-metrics	2016	PDF, HTML	population, demography, anthropology, population dynamics	English	https://genus.springeropen.com/about/editorial-board	Double blind peer review	https://genus.springeropen.com/about	https://genus.springeropen.com/about	https://genus.springeropen.com/submission-guidelines	Yes	https://genus.springeropen.com/submission-guidelines/editorial-policies	8	https://genus.springeropen.com/about	Yes	https://genus.springeropen.com/articles/10.1186/s41118-018-0042-x	CC BY		https://genus.springeropen.com/submission-guidelines/copyright	Yes	Sherpa/Romeo	True
Geographica Helvetica	http://www.geographica-helvetica.net/	GH	0016-7312	2194-8798	Copernicus Publications	Department of Geography, University of Zurich (UZH)	Copernicus Publications	Germany	No	http://www.geographica-helvetica.net/for_authors/article_processing_charges.html				http://www.geographica-helvetica.net/for_authors/article_processing_charges.html					Yes	http://publications.copernicus.org/for_authors/financial_support.html	CLOCKSS, Portico		http://retro.seals.ch	http://www.geographica-helvetica.net/index.html	Yes	DOI	Yes	http://www.geographica-helvetica.net/about/article_level_metrics.html	1946	PDF, XML	human geography, physical geography, cartography, GIS, remote sensing	English, French, German, Italian	http://www.geographica-helvetica.net/editorial_board.html	Double blind peer review	http://www.geographica-helvetica.net/peer_review/review_process.html	http://www.geographica-helvetica.net/about/aims_and_scope.html	http://www.geographica-helvetica.net/for_authors/manuscript_preparation.html	Yes	http://www.geographica-helvetica.net/for_authors/plagiarism_detection.html	53	http://www.geographica-helvetica.net/index.html	Yes	http://www.geogr-helv.net/70/109/2015/gh-70-109-2015.xml	CC BY		http://www.geographica-helvetica.net/about/licence_and_copyright.html	Yes	Sherpa/Romeo	True
Geologija	http://www.geologija-revija.si		0016-7789	1854-620X	Geological Survey of Slovenia		Geological Survey of Slovenia	Slovenia	No	http://www.geologija-revija.si/en/default.aspx?id=7				http://www.geologija-revija.si/en/default.aspx?id=7								dLib.si - The Digital Library of Slovenia		http://www.dlib.si/results/?query=%27rel%3dGeologija%27&pageSize=100&fformattypeserial=journal		DOI			1990	PDF	geochemistry, geohazards, geological mapping, stratigraphy, palaeontology, mineralogy	English, Slovenian	http://www.geologija-revija.si/en/default.aspx?id=3	Peer review	http://www.geologija-revija.si/en/default.aspx?id=7	http://www.geologija-revija.si/en/default.aspx?id=7	http://www.geologija-revija.si/en/default.aspx?id=4			10	http://www.geologija-revija.si/en/default.aspx?id=7	Yes	http://www.geologija-revija.si/default.aspx?id=7	CC BY		http://www.geologija-revija.si/en/default.aspx?id=7	Yes	Sherpa/Romeo	True
Ginekologia Polska	https://journals.viamedica.pl/ginekologia_polska		0017-0011		VM Media sp. z o.o. VM Group sp.k. Grupa Via Medica	The Polish Gynecological Society	OJS	Poland	Yes	https://journals.viamedica.pl/ginekologia_polska/about/submissions#authorFees	400	EUR - Euro		https://journals.viamedica.pl/ginekologia_polska/about/submissions#authorFees												DOI			2007	PDF	Gynecology, Obstetrics, Gynecology Oncology	English, Polish	https://journals.viamedica.pl/ginekologia_polska/about/editorialTeam	Double blind peer review	https://journals.viamedica.pl/ginekologia_polska/about/editorialPolicies#peerReviewProcess	https://journals.viamedica.pl/ginekologia_polska/about/editorialPolicies#focusAndScope	https://journals.viamedica.pl/ginekologia_polska/about/submissions#authorGuidelines			35	https://journals.viamedica.pl/ginekologia_polska/about/editorialPolicies#custom-1			CC BY-NC-ND		https://journals.viamedica.pl/ginekologia_polska/about/editorialPolicies#custom-1	Yes		False
Grasas y Aceites	http://grasasyaceites.revistas.csic.es/index.php/grasasyaceites		0017-3495	1988-4214	Consejo Superior de Investigaciones Científicas		OJS	Spain	No	http://grasasyaceites.revistas.csic.es/index.php/grasasyaceites/about/editorialPolicies				http://grasasyaceites.revistas.csic.es/index.php/grasasyaceites/about/editorialPolicies												DOI			1991	PDF, HTML, XML	edible fats, edible oils, oleaginous fruits and seeds, table olives, by-products	English, Spanish; Castilian	http://grasasyaceites.revistas.csic.es/index.php/grasasyaceites/about/editorialTeam	Double blind peer review	http://grasasyaceites.revistas.csic.es/index.php/grasasyaceites/about/editorialPolicies#peerReviewProcess	http://grasasyaceites.revistas.csic.es/index.php/grasasyaceites/about/editorialPolicies#focusAndScope	http://grasasyaceites.revistas.csic.es/index.php/grasasyaceites/about/submissions#authorGuidelines			48	http://grasasyaceites.revistas.csic.es/index.php/grasasyaceites/about/editorialPolicies#openAccessPolicy	Yes	http://grasasyaceites.revistas.csic.es/index.php/grasasyaceites/article/view/1494/1565	CC BY-NC		http://grasasyaceites.revistas.csic.es/index.php/grasasyaceites	Yes		False
Greek, Roman, and Byzantine Studies	http://grbs.library.duke.edu/index		0017-3916	2159-3159	Duke University		OJS	United States	No	http://grbs.library.duke.edu/about/editorialPolicies#focusAndScope				http://grbs.library.duke.edu/about/editorialPolicies#focusAndScope										http://grbs.library.duke.edu/about/submissions#copyrightNotice	Yes				2004	PDF	antiquity, Byzantium, history of Greece, Greek culture, Greek literature, Hellenic studies	English	http://grbs.library.duke.edu/index	Blind peer review	http://grbs.library.duke.edu/about/editorialPolicies#peerReviewProcess	http://grbs.library.duke.edu/about/editorialPolicies#focusAndScope	http://grbs.library.duke.edu/about/submissions#authorGuidelines			22	http://grbs.library.duke.edu/about/editorialPolicies#openAccessPolicy			CC BY		http://grbs.library.duke.edu/about/submissions#copyrightNotice	Yes		True
Heimen	https://www.idunn.no/heimen		0017-9841	1894-3195	Scandinavian University Press/Universitetsforlaget	Landslaget for lokalhistorie	Idunn	Norway	No	https://www.idunn.no/heimen				https://www.idunn.no/heimen											Yes	DOI			2017	PDF, HTML, XML	local history, regional history, history, local communities	Bokmål, Norwegian; Norwegian Bokmål, Norwegian Nynorsk; Nynorsk, Norwegian	https://www.idunn.no/heimen#editors	Double blind peer review	https://www.idunn.no/heimen#about	https://www.idunn.no/heimen#about	https://www.idunn.no/file/ci/66807456/325_Heimen_Forfatterinstruks.pdf			52	https://www.idunn.no/heimen#rights	Yes	https://www.idunn.no/heimen/2017/01/nye_bidrag_til_eiendomshistorien_ifinnmark	CC BY-NC		https://www.idunn.no/heimen#rights	Yes	Sherpa/Romeo	True
Hereditas	http://www.hereditasjournal.com/		0018-0661	1601-5223	BMC	The Mendelian Society of Lund	BMC	United Kingdom	Yes	http://hereditasjournal.biomedcentral.com/about	1370	GBP - Pound Sterling		http://hereditasjournal.biomedcentral.com/about					Yes	http://www.biomedcentral.com/getpublished/article-processing-charges	CLOCKSS, Portico	Koninklijke Bibliotheek		http://www.biomedcentral.com/getpublished/indexing-archiving-and-access-to-data/journal-archiving	Yes	DOI	Yes	http://www.hereditasjournal.com/content/152/1/3/about	2005	PDF, HTML	genetics, genomics	English	http://hereditasjournal.biomedcentral.com/about/editorial-board	Blind peer review	http://hereditasjournal.biomedcentral.com/about	http://hereditasjournal.biomedcentral.com/about	http://hereditasjournal.biomedcentral.com/submission-guidelines	Yes	http://www.biomedcentral.com/getpublished/editorial-policies#duplicate+publication	6	http://hereditasjournal.biomedcentral.com/about	Yes	http://www.hereditasjournal.com/content/152/1/3	CC BY		http://www.biomedcentral.com/about/policies/license-agreement	Yes	Sherpa/Romeo	True
Hispania	http://hispania.revistas.csic.es/index.php/hispania		0018-2141	1988-8368	Consejo Superior de Investigaciones Científicas	Consejo Superior de Investigaciones Científicas	OJS	Spain	No	http://hispania.revistas.csic.es/index.php/hispania/about/editorialPolicies#openAccessPolicy				http://hispania.revistas.csic.es/index.php/hispania/about/editorialPolicies#openAccessPolicy											Yes	DOI			2001	PDF	Medieval Societies, Modern Societies, Contemporary Societies	Spanish; Castilian	http://hispania.revistas.csic.es/index.php/hispania/about/editorialTeam	Double blind peer review	http://hispania.revistas.csic.es/index.php/hispania/about/submissions	http://hispania.revistas.csic.es/index.php/hispania/about/editorialPolicies#focusAndScope	http://hispania.revistas.csic.es/index.php/hispania/about/submissions#authorGuidelines			48	http://hispania.revistas.csic.es/index.php/hispania/about/editorialPolicies#openAccessPolicy			CC BY		http://hispania.revistas.csic.es/index.php/hispania/about/submissions#copyrightNotice	Yes		False
Hispania Sacra	http://hispaniasacra.revistas.csic.es/index.php/hispaniasacra/index		0018-215X	1988-4265	Consejo Superior de Investigaciones Científicas		OJS	Spain	No	http://hispaniasacra.revistas.csic.es/index.php/hispaniasacra/about/editorialPolicies				http://hispaniasacra.revistas.csic.es/index.php/hispaniasacra/about/editorialPolicies												DOI			2001	PDF	Hispanic civilization, historiography, history of religion, christianity, religious traditions, anthropology	Spanish; Castilian	http://hispaniasacra.revistas.csic.es/index.php/hispaniasacra/about/editorialTeam	Double blind peer review	http://hispaniasacra.revistas.csic.es/index.php/hispaniasacra/about/editorialPolicies#peerReviewProcess	http://hispaniasacra.revistas.csic.es/index.php/hispaniasacra/about/editorialPolicies#focusAndScope	http://hispaniasacra.revistas.csic.es/index.php/hispaniasacra/about/submissions#authorGuidelines			48	http://hispaniasacra.revistas.csic.es/index.php/hispaniasacra/about/editorialPolicies#openAccessPolicy			CC BY-NC		http://hispaniasacra.revistas.csic.es/index.php/hispaniasacra/index	Yes	OAI-PMH	False
Indian Heart Journal	https://www.journals.elsevier.com/indian-heart-journal/		0019-4832		Elsevier	Cardiological Society of India	www.sciencedirect.com	Netherlands	No	https://www.elsevier.com/journals/indian-heart-journal/0019-4832/guide-for-authors				https://www.elsevier.com/journals/indian-heart-journal/0019-4832/guide-for-authors					Yes	http://www.elsevier.com/about/corporate-responsibility/research-4-life/research-4-life-programs	CLOCKSS, Portico	Koninklijke Bibliotheek		https://www.elsevier.com/about/our-business/policies/digital-archive		DOI			2013	PDF, HTML	clinical cardiology, non-clinical cardiology, cardiovascular medicine, cardiovascular surgery	English	https://www.journals.elsevier.com/indian-heart-journal/editorial-board	Double blind peer review	https://www.elsevier.com/journals/indian-heart-journal/0019-4832/guide-for-authors	https://www.journals.elsevier.com/indian-heart-journal/	https://www.elsevier.com/journals/indian-heart-journal/0019-4832/guide-for-authors	Yes	https://www.elsevier.com/editors/perk/plagiarism-complaints/plagiarism-detection	53	https://www.elsevier.com/journals/indian-heart-journal/0019-4832/open-access-journal	Yes	http://www.sciencedirect.com/science/article/pii/S0019483215002709	CC BY-NC-ND		https://www.elsevier.com/journals/indian-heart-journal/0019-4832/open-access-journal	Yes	Sherpa/Romeo	False
Indian Journal of Anaesthesia	http://www.ijaweb.org		0019-5049	0976-2817	Wolters Kluwer Medknow Publications	Indian Society of Anaesthesiologists	Wolters Kluwer Medknow Publications	India	No	http://www.ijaweb.org/contributors.asp#msppc				http://www.ijaweb.org/contributors.asp#msppc							LOCKSS, CLOCKSS, Portico, PMC/Europe PMC/PMC Canada			http://www.ijaweb.org/aboutus.asp	Yes	DOI	Yes	http://medknow.com/statistics.asp	2002	PDF, HTML, ePUB	anaesthesiology, critical care medicine, trauma and emergency medicine, pain and palliative care, disaster management	English	http://www.ijaweb.org/editorialboard.asp	Double blind peer review	http://www.ijaweb.org/contributors.asp#tep	http://www.ijaweb.org/contributors.asp#soj	http://www.ijaweb.org/contributors.asp			36	http://www.ijaweb.org/aboutus.asp	Yes	http://www.ijaweb.org/temp/IndianJAnaesth61136-4785127_131731.pdf	CC BY-NC-SA		http://www.ijaweb.org/aboutus.asp	Yes	Sherpa/Romeo	False
Indian Journal of Dermatology	http://www.e-ijd.org/		0019-5154	1998-3611	Wolters Kluwer Medknow Publications	Indian Association of Dermatologists, Venereologists and Leprologists, West Bengal	Wolters Kluwer Medknow Publications	India	No	http://www.e-ijd.org/contributors.asp				http://www.e-ijd.org/contributors.asp							LOCKSS, CLOCKSS, Portico, PMC/Europe PMC/PMC Canada			http://www.e-ijd.org/aboutus.asp	Yes	DOI	Yes	http://medknow.com/statistics.asp	2005	PDF, HTML, ePUB	dermatology, skin diseases, dermatological therapeutics, cosmetic dermatology, dermatopathology	English	http://www.e-ijd.org/editorialboard.asp	Blind peer review	http://www.e-ijd.org/contributors.asp#ep	http://www.e-ijd.org/aboutus.asp	http://www.e-ijd.org/contributors.asp			47	http://www.e-ijd.org/aboutus.asp	Yes	http://www.e-ijd.org/temp/IndianJDermatol62129-4714184_130541.pdf	CC BY-NC-SA		http://www.e-ijd.org/aboutus.asp	Yes	Sherpa/Romeo	False
Indian Journal of Orthopaedics	http://ijoonline.com/	IJO	0019-5413	1998-3727	Wolters Kluwer Medknow Publications	Indian Orthopaedic Association	Wolters Kluwer Medknow Publications	India	No	http://www.ijoonline.com/aboutus.asp				http://www.ijoonline.com/aboutus.asp							LOCKSS, CLOCKSS, Portico, PMC/Europe PMC/PMC Canada			http://www.ijoonline.com/aboutus.asp	Yes	DOI	Yes	http://medknow.com/statistics.asp	2005	PDF, HTML, ePUB	clinical orthopaedics, orthopaedic surgery	English	http://ijoonline.com/editorialboard.asp	Double blind peer review	http://www.ijoonline.com/contributors.asp	http://ijoonline.com/aboutus.asp	http://ijoonline.com/contributors.asp			53	http://ijoonline.com/aboutus.asp	Yes	http://www.ijoonline.com/article.asp?issn=0019-5413;year=2017;volume=51;issue=1;spage=36;epage=42;aulast=Mahesha	CC BY-NC-SA		http://www.ijoonline.com/aboutus.asp	Yes	Sherpa/Romeo	False
Indian Journal of Psychiatry	http://www.indianjpsychiatry.org/		0019-5545	1998-3794	Wolters Kluwer Medknow Publications	Indian Psychiatric Society	Wolters Kluwer Medknow Publications	India	No	http://www.indianjpsychiatry.org/aboutus.asp				http://www.indianjpsychiatry.org/aboutus.asp							LOCKSS, CLOCKSS, Portico, PMC/Europe PMC/PMC Canada			http://www.indianjpsychiatry.org/aboutus.asp	Yes	DOI	Yes	http://medknow.com/statistics.asp	2007	PDF, HTML, ePUB	psychiatry	English	http://www.indianjpsychiatry.org/editorialboard.asp	Double blind peer review	http://www.indianjpsychiatry.org/contributors.asp	http://www.indianjpsychiatry.org/aboutus.asp	http://www.indianjpsychiatry.org/contributors.asp			34	http://www.indianjpsychiatry.org/aboutus.asp	Yes	http://www.indianjpsychiatry.org/article.asp?issn=0019-5545;year=2016;volume=58;issue=3;spage=241;epage=243;aulast=Sathyanarayana	CC BY-NC-SA		http://www.indianjpsychiatry.org/aboutus.asp	Yes	Sherpa/Romeo	False
Indian Journal of Public Health	http://www.ijph.in/		0019-557X	2229-7693	Wolters Kluwer Medknow Publications	Indian Public Health Association	Wolters Kluwer Medknow Publications	India	Yes	http://www.ijph.in/contributors.asp	4000	INR - Indian Rupee	Yes	http://www.ijph.in/contributors.asp	570	INR - Indian Rupee					CLOCKSS, LOCKSS			http://www.ijph.in/aboutus.asp	Yes	DOI	Yes	http://www.medknow.com/statistics.asp	2010	PDF, HTML, ePUB	health protection, public health policy, nutrition, behavioural medicine, epidemiology, public health	English	http://www.ijph.in/editorialboard.asp	Double blind peer review	http://www.ijph.in/contributors.asp#editorial	http://www.ijph.in/contributors.asp#scope	http://www.ijph.in/contributors.asp			21	http://www.ijph.in/aboutus.asp	Yes	http://www.ijph.in/downloadpdf.asp?issn=0019-557X;year=2017;volume=61;issue=4;spage=233;epage=238;aulast=Devara;type=2	CC BY-NC-SA		http://www.ijph.in/aboutus.asp	Yes		False
Informes de la Construccion	http://informesdelaconstruccion.revistas.csic.es		0020-0883	1988-3234	Consejo Superior de Investigaciones Científicas		OJS	Spain	No	http://informesdelaconstruccion.revistas.csic.es/index.php/informesdelaconstruccion/about/editorialPolicies				http://informesdelaconstruccion.revistas.csic.es/index.php/informesdelaconstruccion/about/editorialPolicies												DOI			1971	PDF, HTML, XML	architecture and engineering, environment, construction systems, testing techniques, building compound research	English, Spanish; Castilian	http://informesdelaconstruccion.revistas.csic.es/index.php/informesdelaconstruccion/about/editorialTeam	Double blind peer review	http://informesdelaconstruccion.revistas.csic.es/index.php/informesdelaconstruccion/about/editorialPolicies#peerReviewProcess	http://informesdelaconstruccion.revistas.csic.es/index.php/informesdelaconstruccion/about/editorialPolicies#focusAndScope	http://informesdelaconstruccion.revistas.csic.es/index.php/informesdelaconstruccion/about/submissions#authorGuidelines			48	http://informesdelaconstruccion.revistas.csic.es/index.php/informesdelaconstruccion/about/editorialPolicies#openAccessPolicy	Yes	http://informesdelaconstruccion.revistas.csic.es/index.php/informesdelaconstruccion/article/view/3630/4089	CC BY-NC		http://informesdelaconstruccion.revistas.csic.es/index.php/informesdelaconstruccion/index	Yes		False
Arquivos do Instituto Biológico	http://www.biologico.sp.gov.br/arquivos_bio.php	Journal of Animal, Plant Sanity and Environmental Protection	0020-3653	1808-1657	Zeppelini Editorial	Instituto Biológico	SciELO Brazil	Brazil	Yes	http://www.biologico.sp.gov.br/rev_arq_intrucoes.php	50	BRL - Brazilian Real		http://www.biologico.sp.gov.br/rev_arq_intrucoes.php											Yes	DOI			2000	PDF	veterinary, animal sanity, vegetal sanity, food security, synantropic pests, agronomy	English, Portuguese, Spanish; Castilian	http://www.biologico.sp.gov.br/rev_arq_comite.php	Peer review	http://www.biologico.sp.gov.br/rev_arq_procedimento.php	http://www.biologico.sp.gov.br/rev_arq_intrucoes.php	http://www.biologico.sp.gov.br/rev_arq_intrucoes.php			48	http://www.biologico.sp.gov.br/rev_arq_procedimento.php		http://www.biologico.sp.gov.br/arquivos_bio.php AND http://www.scielo.br/scielo.php?script=sci_serial&pid=1808-1657&lng=en&nrm=iso	CC BY-NC		http://www.biologico.sp.gov.br/rev_arq_intrucoes.php	Yes		False
Revista do Instituto de Estudos Brasileiros	http://www.scielo.br/scielo.php?script=sci_serial&pid=0020-3874&lng=en&nrm=iso		0020-3874		Instituto de Estudos Brasileiros			Brazil	No	http://www.scielo.br/revistas/rieb/iinstruc.htm				http://www.scielo.br/revistas/rieb/iinstruc.htm											Yes		Yes	http://www.scielo.br/statjournal.php?lang=en&issn=0020-3874&collection=scl	2012	PDF, HTML, XML	social networks	English, Portuguese	http://www.scielo.br/revistas/rieb/iedboard.htm	Peer review	http://www.scielo.br/revistas/rieb/iinstruc.htm	http://www.scielo.br/revistas/rieb/iinstruc.htm	http://www.scielo.br/revistas/rieb/iinstruc.htm			16	http://www.scielo.br/revistas/rieb/isubscrp.htm	Yes	http://www.scielo.br/scielo.php?script=sci_arttext&pid=S0020-38742016000200075&lng=en&nrm=iso&tlng=pt	CC BY-NC		http://www.scielo.br/revistas/rieb/iaboutj.htm	Yes		False
Annali dell'Istituto Superiore di Sanità	http://www.annali-iss.eu/		0021-2571	2384-8553	Istituto Superiore di Sanità	Istituto Superiore di Sanità	OJS	Italy	No	http://www.annali-iss.eu/about/editorialPolicies#custom-1				http://www.annali-iss.eu/about/editorialPolicies#custom-1										http://www.iss.it/anna/	Yes	DOI	Yes	http://www.annali-iss.eu/	2001	PDF, HTML	public health, biomedicine	English	http://www.annali-iss.eu/about/editorialTeam	Blind peer review	http://www.annali-iss.eu/about/editorialPolicies#peerReviewProcess	http://www.annali-iss.eu/about/editorialPolicies#focusAndScope	http://www.annali-iss.eu/about/submissions#authorGuidelines			8	http://www.annali-iss.eu/about/editorialPolicies#openAccessPolicy	Yes	http://www.annali-iss.eu/article/view/244	CC BY-NC-ND		http://www.annali-iss.eu/about/submissions#copyrightNotice	Yes	Sherpa/Romeo	True
Jornal de Pediatria	http://www.scielo.br/jped		0021-7557	1678-4782	Elsevier	Brazilian Society of Pediatrics	www.sciencedirect.com	Netherlands	No	https://www.elsevier.com/journals/jornal-de-pediatria/0021-7557/open-access-journal				https://www.elsevier.com/journals/jornal-de-pediatria/0021-7557/open-access-journal					Yes	http://www.elsevier.com/about/corporate-responsibility/research-4-life/research-4-life-programs	CLOCKSS, Portico	Koninklijke Bibliotheek		https://www.elsevier.com/about/our-business/policies/digital-archive	Yes	DOI			2013	PDF, HTML	pediatrics, infants, adolescents, newborns, children	English	https://www.journals.elsevier.com/jornal-de-pediatria/editorial-board	Double blind peer review	https://www.elsevier.com/journals/jornal-de-pediatria/0021-7557/guide-for-authors	https://www.journals.elsevier.com/jornal-de-pediatria/	https://www.elsevier.com/journals/jornal-de-pediatria/0021-7557/guide-for-authors	Yes	https://www.elsevier.com/editors/perk/plagiarism-complaints/plagiarism-detection	12	https://www.elsevier.com/journals/jornal-de-pediatria/0021-7557/open-access-journal	Yes	http://www.sciencedirect.com/science/article/pii/S0021755713000041	CC BY-NC-ND		https://www.elsevier.com/journals/jornal-de-pediatria/0021-7557/open-access-journal	Yes		False
Journal of Glaciology	https://www.cambridge.org/core/journals/journal-of-glaciology		0022-1430	1727-5652	Cambridge University Press	International Glaciological Society	Cambridge Core	United Kingdom	Yes	https://www.cambridge.org/core/journals/journal-of-glaciology/information/open-access-information-for-journal-of-glaciology-and-annals-of-glaciology	1200	GBP - Pound Sterling		https://www.cambridge.org/core/journals/journal-of-glaciology/information/open-access-information-for-journal-of-glaciology-and-annals-of-glaciology					Yes	https://www.cambridge.org/core/journals/journal-of-glaciology/information/open-access-information-for-journal-of-glaciology-and-annals-of-glaciology	LOCKSS, CLOCKSS, Portico			https://www.cambridge.org/core/services/agents/journals-for-agents	Yes	DOI			2016	PDF, HTML	glaciology, atmosphere, climate, palaeoclimatology, environment	English	https://www.cambridge.org/core/journals/journal-of-glaciology/information/editorial-board	Blind peer review	https://www.cambridge.org/core/journals/journal-of-glaciology/information/instructions-contributors	https://www.cambridge.org/core/journals/journal-of-glaciology	https://www.cambridge.org/core/journals/journal-of-glaciology/information/instructions-contributors			18	https://www.cambridge.org/core/journals/journal-of-glaciology/information/open-access-information-for-journal-of-glaciology-and-annals-of-glaciology	Yes	https://www.cambridge.org/core/journals/journal-of-glaciology/article/div-classtitlean-11-year-record-of-mass-balance-of-brewster-glacier-new-zealand-determined-using-a-geostatistical-approachdiv/C9904FB23A8ABDA1B6865313A0C6BFD9	CC BY-NC-ND		https://www.cambridge.org/core/journals/journal-of-glaciology/information/open-access-information-for-journal-of-glaciology-and-annals-of-glaciology	Yes	Sherpa/Romeo	False
Journal of Postgraduate Medicine	http://www.jpgmonline.com/		0022-3859	0972-2823	Wolters Kluwer Medknow Publications	Staff Society, Seth GS Medical College and KEM Hospital, Mumbai	Wolters Kluwer Medknow Publications	India	No	http://www.jpgmonline.com/contributors.asp#Man				http://www.jpgmonline.com/contributors.asp#Man							LOCKSS, CLOCKSS, Portico, PMC/Europe PMC/PMC Canada			http://www.jpgmonline.com/aboutus.asp	Yes	DOI	Yes	http://medknow.com/statistics.asp	1990	PDF, HTML, ePUB	medicine, surgery, clinical medicine	English	http://www.jpgmonline.com/editorialboard.asp	Double blind peer review	http://www.jpgmonline.com/contributors.asp#Edi	http://www.jpgmonline.com/contributors.asp#Sco	http://www.jpgmonline.com/contributors.asp			40	http://www.jpgmonline.com/aboutus.asp	Yes	http://www.jpgmonline.com/article.asp?issn=0022-3859;year=2016;volume=62;issue=4;spage=228;epage=234;aulast=Surase	CC BY-NC-SA		http://www.jpgmonline.com/aboutus.asp	Yes	Sherpa/Romeo	False
Kemija u Industriji	http://www.hdki.hr/kui		0022-9830	1334-9090	Croatian Society of Chemical Engineers	Croatian Society of Chemical Engineers		Croatia	No	http://silverstripe.fkit.hr/kui/about-the-journal/copyright-policy/				http://silverstripe.fkit.hr/kui/about-the-journal/copyright-policy/								Croatian Web Archive	Hrcak	http://haw.nsk.hr/en/publikacija/685/kemija-u-industriji	Yes	DOI			2004	PDF	chemical engineering, chemistry, technology, biochemical engineering	Croatian, English	http://silverstripe.fkit.hr/kui/about-the-journal/editorial-office/	Blind peer review	http://silverstripe.fkit.hr/kui/authors/author-instructions/	http://silverstripe.fkit.hr/kui/about-the-journal/	http://silverstripe.fkit.hr/kui/authors/author-instructions/	Yes	http://silverstripe.fkit.hr/kui/authors/author-instructions/	24	http://silverstripe.fkit.hr/kui/about-the-journal/copyright-policy/	Yes	http://silverstripe.fkit.hr/kui/issue-archive/article/512	CC BY		http://silverstripe.fkit.hr/kui/about-the-journal/copyright-policy/	Yes	Sherpa/Romeo	True
???????? ????????	http://hirurgiya.com.ua	Klinicheskaia khirurgiia	0023-2130	2522-1396	Liga-Inform ltd.	Association of Surgeons of Ukraine, A.A.Shalimov National Institute of Surgery and Transplantology	OJS	Ukraine	No	https://hirurgiya.com.ua/index.php/journal/instructions				https://hirurgiya.com.ua/index.php/journal/instructions								Vernadsky National Library of Ukraine		https://hirurgiya.com.ua/index.php/journal/journal-policies	Yes	DOI			2008	PDF	general surgery, urology, traumatology	Russian, Ukrainian	https://hirurgiya.com.ua/index.php/journal/about/editorialTeam	Double blind peer review	https://hirurgiya.com.ua/index.php/journal/review-procedure	https://hirurgiya.com.ua/index.php/journal/focus-and-scope	https://hirurgiya.com.ua/index.php/journal/instructions	Yes	https://hirurgiya.com.ua/index.php/journal/journal-policies	12	https://hirurgiya.com.ua/index.php/journal/index			CC BY		https://hirurgiya.com.ua/index.php/journal/journal-policies	Yes		True
Knjižnica	http://knjiznica.zbds-zveza.si/index.php/knjiznica	Library	0023-2424	1581-7903	Zveza Bibliotekarskih Društev Slovenije, Narodna in Univerzitetna Knjižnica	Slovenian Library Association	OJS	Slovenia	No	http://knjiznica.zbds-zveza.si/index.php/knjiznica/about/editorialPolicies				http://knjiznica.zbds-zveza.si/index.php/knjiznica/about/editorialPolicies								Dlib		http://www.dlib.si/details/URN:NBN:SI:spr-L1LNKFLF	Yes	URN - when deposited in the digital repository of the National and University Library, each article is assigned an active and permanent URN identifier			2000	PDF	library science, information science, book studies, reading research	Croatian, English, German, Slovenian	http://knjiznica.zbds-zveza.si/index.php/knjiznica/about/editorialTeam	Double blind peer review	http://knjiznica.zbds-zveza.si/index.php/knjiznica/about/editorialPolicies#focusAndScope	http://knjiznica.zbds-zveza.si/index.php/knjiznica/about/editorialPolicies#focusAndScope	http://knjiznica.zbds-zveza.si/index.php/knjiznica/about/submissions#authorGuidelines			8	http://knjiznica.zbds-zveza.si/index.php/knjiznica/about/editorialPolicies#openAccessPolicy			CC BY-NC		http://knjiznica.zbds-zveza.si/index.php/knjiznica/about/editorialPolicies	Yes		True
Koers : Bulletin for Christian Scholarship	http://www.koersjournal.org.za	Koers : Bulletin vir Christelike Wetenskap	0023-270X	2304-8557	Scriber Editorial Systems	Koers Association	Scriber Editorial Systems	South Africa	Yes	http://www.koers.co.za/uploads/5/7/5/2/5752154/koers_stylesheet_2015.pdf	513	ZAR - Rand		http://www.koers.co.za/uploads/5/7/5/2/5752154/koers_stylesheet_2015.pdf							LOCKSS			http://www.koersjournal.org.za/index.php/koers/about/editorialPolicies#archiving	Yes	DOI			1934	PDF	theology, education, ethics, practical, modernity	Afrikaans, English	http://www.koersjournal.org.za/index.php/koers/about/editorialTeam	Double blind peer review	http://www.koersjournal.org.za/index.php/koers/about/editorialPolicies#peerReviewProcess	http://www.koersjournal.org.za/index.php/koers/about/editorialPolicies#focusAndScope	http://www.koers.co.za/uploads/5/7/5/2/5752154/koers_stylesheet_2015.pdf	Yes	http://www.koersjournal.org.za/index.php/koers/pages/view/ethics	12	http://www.koersjournal.org.za/index.php/koers/about/editorialPolicies#openAccessPolicy	Yes	http://www.koersjournal.org.za/index.php/koers/article/view/2227/pdf	CC BY		http://www.koersjournal.org.za/index.php/koers/about/submissions#copyrightNotice	Yes	Sherpa/Romeo	True
Kunst og Kultur	https://www.idunn.no/kk		0023-5415	1504-3029	Scandinavian University Press/Universitetsforlaget	National Museum of Art, Architecture and Design	Idunn	Norway	No	https://www.idunn.no/kk				https://www.idunn.no/kk											Yes	DOI			2017	PDF, HTML, XML	history of arts, art, culture	Bokmål, Norwegian; Norwegian Bokmål, Norwegian Nynorsk; Nynorsk, Norwegian	https://www.idunn.no/kk#editors	Double blind peer review	https://www.idunn.no/kk#about	https://www.idunn.no/kk#about	https://www.idunn.no/file/ci/66482151/Forfatterveiledning_Kunst_og_Kultur_2016.pdf			52	https://www.idunn.no/kk#rights	Yes	https://www.idunn.no/kk/2017/01-02/munch_a_modern_velzquez	CC BY-NC		https://www.idunn.no/kk#rights	Yes	Sherpa/Romeo	True
Icelandic Medical Journal	http://www.laeknabladid.is/	Læknablaðið	0023-7213		The Icelandic Medical Association	The Icelandic Medical Association		Iceland	No	http://www.laeknabladid.is/about				http://www.laeknabladid.is/about								Landsbókasafn		http://www.laeknabladid.is/fragangur-greina/fyrir-hofunda/nr/2814					2000	PDF, HTML	medicine, Iceland	Icelandic	http://www.laeknabladid.is/about	Blind peer review	http://www.laeknabladid.is/fragangur-greina/fyrir-ritryna/nr/3173	http://www.laeknabladid.is/fragangur-greina/fyrir-hofunda/nr/2814	http://www.laeknabladid.is/fragangur-greina/fyrir-hofunda/	Yes	http://www.laeknabladid.is/fragangur-greina/fyrir-hofunda/nr/2814	10	http://www.laeknabladid.is/about			CC BY-NC-ND		http://www.laeknabladid.is/about	Yes		False
Landtechnik	http://www.landtechnik-online.eu			0023-8082	Kuratorium für Technik und Bauwesen in der Landwirtschaft e. V.		OJS	Germany	No	https://www.landtechnik-online.eu/ojs-2.4.5/index.php/landtechnik/about/editorialPolicies#custom-0				https://www.landtechnik-online.eu/ojs-2.4.5/index.php/landtechnik/about/editorialPolicies#custom-0								German National Library		https://www.landtechnik-online.eu/ojs-2.4.5/index.php/landtechnik/about/editorialPolicies#openAccessPolicy	Yes	DOI			2015	PDF	agriculture, agricultural engineering, crop production, livestock husbandry, energy production, information technology	English, German	https://www.landtechnik-online.eu/ojs-2.4.5/index.php/landtechnik/about/editorialPolicies#custom-2	Blind peer review	https://www.landtechnik-online.eu/ojs-2.4.5/index.php/landtechnik/about/editorialPolicies#peerReviewProcess	https://www.landtechnik-online.eu/ojs-2.4.5/index.php/landtechnik/about/editorialPolicies#focusAndScope	https://www.landtechnik-online.eu/ojs-2.4.5/index.php/landtechnik/about/submissions#authorGuidelines			16	https://www.landtechnik-online.eu/ojs-2.4.5/index.php/landtechnik/about/editorialPolicies#openAccessPolicy	Yes	https://www.landtechnik-online.eu/ojs-2.4.5/index.php/landtechnik/article/view/2664	CC BY		https://www.landtechnik-online.eu/ojs-2.4.5/index.php/landtechnik/about/submissions#copyrightNotice	Yes	Sherpa/Romeo, EZB Regensburg	True
Revista Lecciones y Ensayos	http://www.derecho.uba.ar/publicaciones/lye/index.php		0024-0079	2362-4620	Editorial Universitaria de Buenos Aires	Universidad de Buenos Aires, Facultad de Derecho		Argentina	No	http://www.derecho.uba.ar/publicaciones/lye/pub_lye_comopublicar.php				http://www.derecho.uba.ar/publicaciones/lye/pub_lye_comopublicar.php										http://biblioteca.derecho.uba.ar/bibder/busqueda/index.asp	Yes				2003	PDF	Argentina, Latin America, law	Spanish; Castilian	http://www.derecho.uba.ar/publicaciones/lye/pub_lye_autoridades.php	Double blind peer review	http://www.derecho.uba.ar/publicaciones/lye/pub_lye_comopublicar.php	http://www.derecho.uba.ar/publicaciones/lye/index.php	http://www.derecho.uba.ar/publicaciones/lye/pautas-formales-de-publicacion-lye.pdf	Yes	http://www.derecho.uba.ar/publicaciones/lye/pub_lye_comopublicar.php	12	http://www.derecho.uba.ar/publicaciones/lye/pub_lye_numeros.php			Publisher's own license	Attribution, No Commercial Usage, No Derivatives	http://www.derecho.uba.ar/publicaciones/lye/pub_lye_numeros.php	Yes		False
Linguistica	http://revije.ff.uni-lj.si/linguistica		0024-3922	2350-420X	Znanstvena založba Filozofske fakultete Univerze v Ljubljani (Ljubljana University Press, Faculty of Arts)	University of Ljubljana, Faculty of Arts	OJS	Slovenia	No	http://revije.ff.uni-lj.si/linguistica/about/editorialPolicies#openAccessPolicy				http://revije.ff.uni-lj.si/linguistica/about/editorialPolicies#openAccessPolicy								dLib		http://www.dlib.si/results/?query=%27keywords%3dlinguistica%27&pageSize=25&frelation=Linguistica+(Ljubljana)	Yes	DOI			2008	PDF	linguistics, modern linguistics	English, French, German, Italian, Slovenian	http://revije.ff.uni-lj.si/linguistica/about/editorialTeam	Double blind peer review	http://revije.ff.uni-lj.si/linguistica/about/editorialPolicies#peerReviewProcess	http://revije.ff.uni-lj.si/linguistica/index	http://revije.ff.uni-lj.si/linguistica/about/submissions#authorGuidelines			12	http://revije.ff.uni-lj.si/linguistica/about/editorialPolicies#openAccessPolicy			CC BY-SA		http://revije.ff.uni-lj.si/linguistica/about/submissions#copyrightNotice	Yes		True
Maal og Minne	http://ojs.novus.no/index.php/MOM		0024-855X	1890-5455	Novus forlag	Bymålslaget	OJS	Norway	No	http://ojs.novus.no/index.php/MOM/about/editorialPolicies#custom-2				http://ojs.novus.no/index.php/MOM/about/editorialPolicies#custom-2										http://ojs.novus.no/index.php/MOM/about/editorialPolicies#archiving	Yes				2007	PDF	Norwegian language, Norwegian language memories, medieval literature, Norwegian place names	Bokmål, Norwegian; Norwegian Bokmål, Danish, English, Norwegian Nynorsk; Nynorsk, Norwegian, Swedish	http://ojs.novus.no/index.php/MOM/about/editorialPolicies#custom-0	Blind peer review	http://ojs.novus.no/index.php/MOM/about/editorialPolicies#peerReviewProcess	http://ojs.novus.no/index.php/MOM/about/editorialPolicies#focusAndScope	http://ojs.novus.no/index.php/MOM/about/submissions#authorGuidelines			26	http://ojs.novus.no/index.php/MOM/about/editorialPolicies#custom-3			CC BY-SA		http://ojs.novus.no/index.php/MOM/about/editorialPolicies#custom-1	Yes		True
Indonesian Journal of Geography	http://jurnal.ugm.ac.id/ijg/		0024-9521		Universitas Gadjah Mada		OJS	Indonesia	Yes	http://jurnal.ugm.ac.id/ijg/about/submissions#authorGuidelines	100	USD - US Dollar		http://jurnal.ugm.ac.id/ijg/about/submissions#authorGuidelines															1986	PDF	remote sensing, physical geography, human geography, development studies, rural and regional planning, urban studies	English	http://jurnal.ugm.ac.id/ijg/about/editorialTeam	Double blind peer review	http://jurnal.ugm.ac.id/ijg/about/editorialPolicies#peerReviewProcess	http://jurnal.ugm.ac.id/ijg/about/editorialPolicies#focusAndScope	http://jurnal.ugm.ac.id/ijg/about/submissions#authorGuidelines			8	http://jurnal.ugm.ac.id/ijg/about/editorialPolicies#openAccessPolicy			CC BY-NC		http://jurnal.ugm.ac.id/ijg/about/editorialPolicies#openAccessPolicy	Yes		False
Matematicki Vesnik	http://www.vesnik.math.rs		0025-5165	2406-0682	Mathematical Society of Serbia	Mathematical Society of Serbia	math.rs	Serbia	No	http://vesnik.math.rs/index.html				http://vesnik.math.rs/index.html															1993	PDF	mathematics	English	http://vesnik.math.rs/board.html	Peer review	http://vesnik.math.rs/forauthors.html	http://vesnik.math.rs/index.html	http://vesnik.math.rs/forauthors.html			25	http://vesnik.math.rs/statement.html	Yes	http://vesnik.math.rs/latest/browse.php?p=latest	CC BY		http://vesnik.math.rs/statement.html	Yes		True
Medicina (Buenos Aires)	http://www.medicinabuenosaires.com/		0025-7680	1669-9106	Fundación Revista Medicina	Fundación Revista Medicina	WordPress	Argentina	Yes	http://www.medicinabuenosaires.com/media/etc/reglamento_.pdf	3000	ARS - Argentine Peso	Yes	http://www.medicinabuenosaires.com/	300	ARS - Argentine Peso			Yes	http://www.medicinabuenosaires.com/reglamento/	CLOCKSS	National Llibrary of Medicine		http://www.ncbi.nlm.nih.gov/pubmed/	Yes	PMID			2003	PDF	medicine, epidemiology, immunology, infectious diseases	English, Spanish; Castilian	http://www.medicinabuenosaires.com/comite-de-redaccion/	Blind peer review	http://www.medicinabuenosaires.com/reglamento/	http://www.medicinabuenosaires.com/	http://www.medicinabuenosaires.com/reglamento/			8	http://www.medicinabuenosaires.com			CC BY		http://www.medicinabuenosaires.com/	Yes	Sherpa/Romeo	False
Medicine	http://journals.lww.com/md-journal		0025-7974	1536-5964	Wolters Kluwer		Wolters Kluwer	United States	Yes	http://journals.lww.com/md-journal/Documents/Files%20and%20Resources/For%20Authors/Medicine%20Instructions%20for%20Authors.pdf	1200	USD - US Dollar		http://journals.lww.com/md-journal/Documents/Files%20and%20Resources/For%20Authors/Medicine%20Instructions%20for%20Authors.pdf							PMC/Europe PMC/PMC Canada			http://journals.lww.com/md-journal/Pages/OpenAccess.aspx		DOI			2014	PDF, HTML, ePUB	medicine, health	English	http://journals.lww.com/md-journal/Pages/Open-Access-Editorial-Board.aspx	Peer review	http://journals.lww.com/md-journal/pages/aboutthejournal.aspx	http://journals.lww.com/md-journal/pages/aboutthejournal.aspx	http://journals.lww.com/md-journal/Documents/Files%20and%20Resources/For%20Authors/Medicine%20Instructions%20for%20Authors.pdf	Yes	http://journals.lww.com/md-journal/Documents/Files%20and%20Resources/For%20Authors/Medicine%20Instructions%20for%20Authors.pdf	3	http://journals.lww.com/md-journal/Pages/OpenAccess.aspx	Yes	http://journals.lww.com/md-journal/Fulltext/2014/08010/High_Body_Mass_Index_Reduces_Glomerular_Filtration.1.aspx	CC BY-NC-ND		http://journals.lww.com/md-journal/Pages/OpenAccess.aspx	Yes	Sherpa/Romeo	True
Journal of the Meteorological Society of Japan	https://www.jstage.jst.go.jp/browse/jmsj	JMSJ	0026-1165		Meteorologial Society of Japan		J-STAGE	Japan	Yes	http://jmsj.metsoc.jp/instructions.html	220000	JPY - Yen		http://jmsj.metsoc.jp/instructions.html					Yes	http://jmsj.metsoc.jp/instructions.html					Yes	DOI	Yes	http://jmsj.metsoc.jp/most_accessed/index.html	2018	PDF	meteorology, climate, weather, atmosphere	English	http://jmsj.metsoc.jp/editors/index.html	Peer review	http://jmsj.metsoc.jp/instructions.html	http://jmsj.metsoc.jp/instructions.html	http://jmsj.metsoc.jp/instructions.html			6	http://jmsj.metsoc.jp/copy.html			CC BY		http://jmsj.metsoc.jp/copy.html	Yes		False
Micronesica	http://micronesica.org		0026-279X		University of Guam Press	University of Guam	University of Guam Press	Guam	Yes	http://micronesica.org/instructions-authors	350	USD - US Dollar		http://micronesica.org/instructions-authors											Yes				1999	PDF	Guam, Micronesia, tropical Western Pacific, biology, physical anthropology, agriculture	English	http://micronesica.org/about-micronesica	Peer review	http://micronesica.org/instructions-authors	http://micronesica.org/instructions-authors	http://micronesica.org/instructions-authors			12	http://micronesica.org/about-micronesica			CC BY-NC-ND		http://micronesica.org/about-micronesica	Yes		False
Bulletin of the Mineral Research and Exploration	http://dergi.mta.gov.tr/index.php		0026-4563		General Directorate of Mineral Research and Exploration			Turkey	No	https://dergi.mta.gov.tr/index.php?id=sayfa&i=1				https://dergi.mta.gov.tr/index.php?id=sayfa&i=1												DOI	Yes	http://dergipark.gov.tr/bulletinofmre/issue/28546/315757	1936	PDF	geology, geophysics, mining	English	https://dergi.mta.gov.tr/index.php?id=sayfa&i=7	Peer review	https://dergi.mta.gov.tr/index.php?id=sayfa&i=3	https://dergi.mta.gov.tr/index.php?id=sayfa&i=3	https://dergi.mta.gov.tr/index.php?id=sayfa&i=3	Yes	https://dergi.mta.gov.tr/index.php?id=sayfa&i=1	10	https://dergi.mta.gov.tr/index.php?id=sayfa&i=1			CC BY-NC-ND		https://dergi.mta.gov.tr/index.php	Yes	Sherpa/Romeo	False
Mljekarstvo	http://hrcak.srce.hr/index.php?show=casopis&id_casopis=33		0026-704X	1846-4025	Croatian Dairy Union		Hrcak	Croatia	No	http://hrcak.srce.hr/mljekarstvo?lang=en				http://hrcak.srce.hr/mljekarstvo?lang=en									Hrcak	http://hrcak.srce.hr/mljekarstvo?lang=en		DOI	Yes	http://hrcak.srce.hr/index.php?show=clanak&id_clanak_jezik=256947	2001	PDF	agronomy, biotechnoogy, food technology, dairy	Croatian, English	http://hrcak.srce.hr/upute/impressum_en_Mljekarstvo.pdf	Peer review	http://hrcak.srce.hr/upute/guide_authors_Mljekarstvo.pdf	http://hrcak.srce.hr/mljekarstvo?lang=en	http://hrcak.srce.hr/upute/guide_authors_Mljekarstvo.pdf			12	http://hrcak.srce.hr/mljekarstvo?lang=en			CC BY-NC		http://hrcak.srce.hr/mljekarstvo?lang=en	Yes	Sherpa/Romeo	False
Moneta e Credito	http://www.monetaecredito.info		0026-9611	2037-3651	Associazione Economia civile	Associazione Economia civile	OJS	Italy	No	http://ojs.uniroma1.it/index.php/monetaecredito/about/editorialPolicies#focusAndScope				http://ojs.uniroma1.it/index.php/monetaecredito/about/editorialPolicies#focusAndScope											Yes				2009	PDF	political economy, financial crisis	Italian	http://ojs.uniroma1.it/index.php/monetaecredito/about/editorialTeam	Double blind peer review	http://ojs.uniroma1.it/index.php/monetaecredito/about/editorialPolicies#peerReviewProcess	http://ojs.uniroma1.it/index.php/monetaecredito/about/editorialPolicies#focusAndScope	http://ojs.uniroma1.it/index.php/monetaecredito/about/submissions#onlineSubmissions			20	http://ojs.uniroma1.it/index.php/monetaecredito/about/editorialPolicies#focusAndScope	Yes	http://ojs.uniroma1.it/index.php/monetaecredito/article/view/13162/12976	CC BY-NC-ND		http://ojs.uniroma1.it/index.php/monetaecredito/about/submissions#copyrightNotice	Yes		True
Journal of Nepal Medical Association	http://www.jnma.com.np		0028-2715	1815-672X	Nepal Medical Association	Nepal Medical Association	OJS	Nepal	No	http://jnma.com.np/jnma/index.php/jnma/about				http://jnma.com.np/jnma/index.php/jnma/about									NMA Library	http://jnma.com.np/jnma/index.php/jnma/about	Yes	we are communicating to get doi, hopefully from 2017			2005	PDF	medical association, medical sciences, medical education, public health	English	http://jnma.com.np/jnma/index.php/jnma/about/editorialTeam	Double blind peer review	http://jnma.com.np/jnma/index.php/jnma/about/submissions	http://jnma.com.np/jnma/index.php/jnma/about/submissions	http://jnma.com.np/jnma/index.php/jnma/about/submissions	Yes	http://jnma.com.np/jnma/index.php/jnma/about	10	http://jnma.com.np/jnma/index.php/jnma/about	Yes	http://jnma.com.np/jnma/index.php/jnma/article/view/2829/2364	CC BY		http://jnma.com.np/jnma/index.php/jnma/about	Yes		True
Norsk Filosofisk Tidsskrift	https://www.idunn.no/nft?languageId=2		0029-1943	1504-2901	Scandinavian University Press/Universitetsforlaget		Idunn	Norway	No	https://www.idunn.no/nft?languageId=2				https://www.idunn.no/nft?languageId=2											Yes	DOI			2017	PDF, HTML, XML	philosophy, Norwegian philosophy, Scandinavian philosophy	Bokmål, Norwegian; Norwegian Bokmål, Norwegian Nynorsk; Nynorsk, Norwegian	https://www.idunn.no/nft?languageId=2#editors	Double blind peer review	https://www.idunn.no/nft?languageId=2#about	https://www.idunn.no/nft?languageId=2#about	https://www.idunn.no/nft?languageId=2#authors			52	https://www.idunn.no/nft?languageId=2#rights	Yes	https://www.idunn.no/nft/2017/01-02/hva_legitimerer_filosofi_i_norge	CC BY-NC		https://www.idunn.no/nft#rights	Yes	Sherpa/Romeo	True
North Carolina Libraries	http://www.ncl.ecu.edu/index.php/NCL		0029-2540		North Carolina Library Association		North Carolina Library Association	United States	No	http://www.ncl.ecu.edu/index.php/NCL/announcement/view/1				http://www.ncl.ecu.edu/index.php/NCL/announcement/view/1											Yes				1942	PDF	librarianship, media centers, academic libraries	English	http://www.ncl.ecu.edu/index.php/NCL/about/editorialTeam	Peer review	http://www.ncl.ecu.edu/index.php/NCL/about/editorialPolicies#peerReviewProcess	http://www.ncl.ecu.edu/index.php/NCL/about/editorialPolicies#focusAndScope	http://www.ncl.ecu.edu/index.php/NCL/about/submissions#onlineSubmissions			12	http://www.ncl.ecu.edu/index.php/NCL/about/editorialPolicies#openAccessPolicy			Publisher's own license	Attribution	http://www.ncl.ecu.edu/index.php/NCL/announcement/view/1	Yes		False
The Nucleus	http://thenucleuspak.org.pk/		0029-5698	2306-6539	Pakistan Institute of Nuclear Science and Technology (PINSTECH)	Pakistan Atomic Energy Commission	OJS	Pakistan	No	http://thenucleuspak.org.pk/index.php/Nucleus/about/editorialPolicies#custom-0				http://thenucleuspak.org.pk/index.php/Nucleus/about/editorialPolicies#custom-0											Yes				2016	PDF	applied sciences, engineering, computer engineering, natural sciences	English	http://thenucleuspak.org.pk/index.php/Nucleus/about/editorialTeam	Blind peer review	http://thenucleuspak.org.pk/index.php/Nucleus/about/editorialPolicies#peerReviewProcess	http://thenucleuspak.org.pk/index.php/Nucleus/about/editorialPolicies#focusAndScope	http://thenucleuspak.org.pk/index.php/Nucleus/about/submissions#authorGuidelines			11	http://thenucleuspak.org.pk/index.php/Nucleus/about/editorialPolicies#openAccessPolicy			CC BY		http://thenucleuspak.org.pk/index.php/Nucleus/about/submissions#copyrightNotice	Yes		False
Nukleonika	http://www.degruyter.com/view/j/nuka		0029-5922		Sciendo	Institute of Nuclear Chemistry and Technology, Poland	Sciendo	Poland	Yes	http://www.degruyter.com/view/supplement/s00295922_Instruction_for_Authors.pdf	45	EUR - Euro		http://www.degruyter.com/view/supplement/s00295922_Instruction_for_Authors.pdf							Portico			http://www.degruyter.com/page/859	Yes	DOI			2014	PDF	nuclear chemistry, nuclear physics, radiation chemistry, radiobiology, nuclear techniques	English	http://www.degruyter.com/view/j/nuka	Double blind peer review	http://www.degruyter.com/view/j/nuka	http://www.degruyter.com/view/j/nuka	http://www.degruyter.com/view/supplement/s00295922_Instruction_for_Authors.pdf	Yes	http://degruyteropen.com/dgopen-takes-a-further-step-to-ward-off-plagiarism/	27	http://degruyteropen.com/you/journal-author/open-access-statement/	Yes	http://www.degruyter.com/view/j/nuka.2015.60.issue-1/nuka-2015-0003/nuka-2015-0003.xml?format=INT	CC BY-NC-ND		http://www.degruyter.com/view/supplement/s00295922_License_to_Publish.pdf	Yes	Sherpa/Romeo	True
Onderstepoort Journal of Veterinary Research	http://www.ojvr.org		0030-2465	2219-0635	AOSIS	Agricultural Research Council, Onderstepoort Veterinary Institute	OJS	South Africa	No	http://ojvr.org/index.php/ojvr/pages/view/faq_author#3				http://ojvr.org/index.php/ojvr/pages/view/authors#3							Portico			http://ojvr.org/index.php/ojvr/pages/view/about#7	Yes	DOI			2003	PDF, HTML, ePUB, XML	veterinary medicine, infectious animal diseases, parasitic diseases	English	http://ojvr.org/index.php/ojvr/pages/view/editorial-team	Double blind peer review	http://ojvr.org/index.php/ojvr/pages/view/about#5	http://ojvr.org/index.php/ojvr/pages/view/about#2	http://ojvr.org/index.php/ojvr/pages/view/authors	Yes	http://ojvr.org/index.php/ojvr/pages/view/newsubmission#4	16	http://ojvr.org/index.php/ojvr/pages/view/about#4	Yes	http://ojvr.org/index.php/ojvr/article/view/863/html	CC BY		http://ojvr.org/index.php/ojvr/pages/view/authors#4	Yes	Sherpa/Romeo	True
Paediatrica Indonesiana	https://paediatricaindonesiana.org/		0030-9311		Indonesian Pediatric Society Publishing House	Indonesian Pediatric Society	OJS	Indonesia	No	https://www.paediatricaindonesiana.org/index.php/paediatrica-indonesiana/about/editorialPolicies#custom-1				https://www.paediatricaindonesiana.org/index.php/paediatrica-indonesiana/about/editorialPolicies#custom-1							PKP PN			https://paediatricaindonesiana.org/index.php/paediatrica-indonesiana	Yes	DOI			2001	PDF	paediatrics, perinatal medicine, child health	English	https://paediatricaindonesiana.org/index.php/paediatrica-indonesiana/Editorial	Peer review	https://paediatricaindonesiana.org/index.php/paediatrica-indonesiana/about/editorialPolicies#peerReviewProcess	https://paediatricaindonesiana.org/index.php/paediatrica-indonesiana/about/editorialPolicies#focusAndScope	https://paediatricaindonesiana.org/index.php/paediatrica-indonesiana/pages/view/instruction			24	https://www.paediatricaindonesiana.org/index.php/paediatrica-indonesiana/about/editorialPolicies#openAccessPolicy	Yes	https://paediatricaindonesiana.org/index.php/paediatrica-indonesiana/article/view/441	CC BY-NC-SA		https://paediatricaindonesiana.org/index.php/paediatrica-indonesiana/about/submissions#copyrightNotice	Yes		True
Pakistan Armed Forces Medical Journal	http://www.pafmj.org		0030-9648	2411-8842	The Army Press	Pakistan Army Medical and Dental Corps		Pakistan	Yes	http://www.pafmj.org/policy.php?pid=2#top14	1000	PKR - Pakistan Rupee	Yes	http://www.pafmj.org/cms_page.php?id=1	5000	PKR - Pakistan Rupee													2005	PDF	medicine, dentistry, biomedical science, public health, medical education	English	http://www.pafmj.org/aboutus.php?id=17	Double blind peer review	http://www.pafmj.org/policy.php?pid=2#top8	http://www.pafmj.org/policy.php?pid=2#top4	http://www.pafmj.org/cms_page.php?id=1	Yes	http://www.pafmj.org/policy.php?pid=2#top10	24	http://www.pafmj.org/policy.php?pid=2#top15	Yes	http://www.pafmj.org/showdetails.php?id=761&t=o	CC BY-NC		http://www.pafmj.org/policy.php?pid=2#top18	Yes		False
Papéis Avulsos de Zoologia	http://www.scielo.br/scielo.php/script_sci_serial/pid_0031-1049/lng_en/nrm_iso		0031-1049	1807-0205	Universidade de São Paulo	Universidade de São Paulo, Museu de Zoologia	SciELO Brazil	Brazil	No	http://www.scielo.br/revistas/paz/iinstruc.htm#004				http://www.scielo.br/revistas/paz/iinstruc.htm#004											Yes	DOI	Yes	http://www.scielo.br/statjournal.php?lang=en&issn=0031-1049	2002	PDF, HTML, XML	biological sciences	English, Portuguese, Spanish; Castilian	http://www.scielo.br/revistas/paz/iedboard.htm	Peer review	http://www.scielo.br/revistas/paz/iinstruc.htm	http://www.scielo.br/revistas/paz/iinstruc.htm	http://www.scielo.br/revistas/paz/iinstruc.htm			8	http://www.scielo.br/revistas/paz/isubscrp.htm	Yes	http://www.scielo.br/scielo.php?script=sci_arttext&pid=S0031-10492014003200001&lng=en&nrm=iso&tlng=en	CC BY		http://www.scielo.br/scielo.php/script_sci_serial/pid_0031-1049/lng_en/nrm_iso	Yes		False
Pensamiento. Revista de Investigación e Información Filosófica	https://revistas.upcomillas.es/index.php/pensamiento/index		0031-4749	2386-5822	Universidad Pontificia Comillas	Universidad Pontificia Comillas. Facultad de Ciencias Humanas y Sociales. Departamento de Filosofía, Humanidades y Comunicación	OJS	Spain	No	https://revistas.upcomillas.es/index.php/pensamiento/about/editorialPolicies#custom-2				https://revistas.upcomillas.es/index.php/pensamiento/about/editorialPolicies#custom-2											Yes	DOI			2016	PDF	Philosophy, Religion, Moral, Freedom, Democracy	Spanish; Castilian	https://revistas.upcomillas.es/index.php/pensamiento/about/editorialTeam	Peer review	https://revistas.upcomillas.es/index.php/pensamiento/about/editorialPolicies#peerReviewProcess	https://revistas.upcomillas.es/index.php/pensamiento/about/editorialPolicies#focusAndScope	https://revistas.upcomillas.es/index.php/pensamiento/about/submissions#authorGuidelines			52	https://revistas.upcomillas.es/index.php/pensamiento/about/editorialPolicies#openAccessPolicy			CC BY-NC-ND		https://revistas.upcomillas.es/index.php/pensamiento/about/submissions#copyrightNotice	Yes		False
Phytopathologia Mediterranea	http://www.fupress.net/index.php/pm/index		0031-9465	1593-2095	Firenze University Press	Mediterranean Phytopathological Union	OJS	Italy	Yes	http://www.fupress.net/index.php/pm/about/editorialPolicies#custom-3	350	EUR - Euro		http://www.fupress.net/index.php/pm/about/editorialPolicies#custom-3								Biblioteche Nazionali Centrali di Roma e Firenze, Magazzini Digitali		http://www.fupress.net/index.php/pm/about/editorialPolicies#custom-2	Yes	DOI			2014	PDF	plant pathology, diseases of Mediterranean crops	English	http://www.fupress.net/index.php/pm/about/editorialTeam	Peer review	http://www.fupress.net/index.php/pm/about/editorialPolicies#peerReviewProcess	http://www.fupress.net/index.php/pm/about/editorialPolicies#focusAndScope	http://www.fupress.net/public/journals/7/pm_guidelines.pdf			8	http://www.fupress.net/index.php/pm/about/editorialPolicies#openAccessPolicy	Yes	http://www.fupress.net/index.php/pm/article/view/16230/17298	CC BY		http://www.fupress.net/index.php/pm/about/editorialPolicies#openAccessPolicy	Yes	Sherpa/Romeo	True
Platinum Metals Review	http://www.technology.matthey.com/about/platinum-metals-review/		0032-1400	1471-0676	Johnson Matthey Plc			United Kingdom	No	http://www.technology.matthey.com/about/open-access-policy/#Funding				http://www.technology.matthey.com/about/open-access-policy/#Funding								British Library		http://explore.bl.uk/primo_library/libweb/action/search.do?dscnt=0&frbg=&scp.scps=scope%3A%28BLCONTENT%29&tab=local_tab&dstmp=1455524226718&srt=rank&ct=search&mode=Basic&vl(488279563UI0)=any&dum=true&tb=t&indx=2&vl(freeText0)=Johnson%20Matthey%20Technology%20Review&vid=BLVU1&fn=search	Yes	DOI			1998	PDF, HTML	chemistry, platinum, platinum group metals	English	http://www.technology.matthey.com/about/the-editorial-board/	Peer review	http://www.technology.matthey.com/for-authors/#peerreview	http://www.technology.matthey.com/about/platinum-metals-review/	http://www.technology.matthey.com/for-authors/			12	http://www.technology.matthey.com/about/open-access-policy/			CC BY-NC-ND		http://www.technology.matthey.com/about/open-access-policy/#License	Yes		False
Politicka Misao	https://hrcak.srce.hr/politicka-misao?lang=en	Croatian Political Science Review	0032-3241	1846-8721	University of Zagreb, Faculty of Political Science		HRCAK, EBSCO, SCOPUS	Croatia	No	https://hrcak.srce.hr/politicka-misao?lang=en				https://hrcak.srce.hr/politicka-misao?lang=en											Yes	DOI	Yes	https://hrcak.srce.hr/index.php?show=clanak&id_clanak_jezik=280562	2014	PDF	political science, international relations, political history, European Union, sociology, social sciences	Croatian, English	https://hrcak.srce.hr/politicka-misao?lang=en	Double blind peer review	https://hrcak.srce.hr/upute/guide_authors_Croatian_Political_Science_Review.pdf	https://hrcak.srce.hr/upute/guide_authors_Croatian_Political_Science_Review.pdf	https://hrcak.srce.hr/upute/guide_authors_Croatian_Political_Science_Review.pdf	Yes	https://hrcak.srce.hr/upute/guide_authors_Croatian_Political_Science_Review.pdf	3	https://hrcak.srce.hr/politicka-misao?lang=en			CC BY-NC-ND		https://hrcak.srce.hr/politicka-misao?lang=en	Yes		True
Postepy Higieny i Medycyny Doswiadczalnej	http://www.phmd.pl	Advances in Hygiene and Experimental Medicine	0032-5449	1732-2693	Index Copernicus International S.A.	Institute of Immunology and Experimental Therapy	Index Copernicus International S.A.	Poland	Yes	http://www.phmd.pl/page.php?IDpage=113&p=4	1100	PLN - Zloty		http://www.phmd.pl/page.php?IDpage=113&p=4													Yes	http://phmd.publisherspanel.com/resources/html/article/details?id=142571	2004	PDF	hygiene, allergy, immunology, experimental medicine, microbiology, medicine	English, Polish	http://www.phmd.pl/page.php?IDpage=116&p=3	Double blind peer review	http://www.phmd.pl/page.php?IDpage=113&p=4	http://www.phmd.pl/page.php?IDpage=113&p=4	http://www.phmd.pl/page.php?IDpage=113&p=4			8	http://www.phmd.pl/text.php?ids=1065	Yes	http://www.phmd.pl/text.php?ids=1065	CC BY-NC		http://www.phmd.pl/text.php?ids=1065	Yes		False
Prismet	https://www.journals.uio.no/index.php/prismet		0032-8847	2535-311X	Kirkelig Pedagogisk Senter (IKO)		OJS	Norway	Yes	https://www.journals.uio.no/index.php/prismet/about/submissions#authorGuidelines	7000	NOK - Norwegian Krone		https://www.journals.uio.no/index.php/prismet/about/submissions#authorGuidelines											Yes	DOI			2017	PDF	religious education, pedagogy, religion, theology, didactics	Bokmål, Norwegian; Norwegian Bokmål, Danish, English, Swedish	https://www.journals.uio.no/index.php/prismet/about/editorialTeam	Double blind peer review	https://www.journals.uio.no/index.php/prismet/about/editorialPolicies#peerReviewProcess	https://www.journals.uio.no/index.php/prismet/about/editorialPolicies#focusAndScope	https://www.journals.uio.no/index.php/prismet/about/submissions#authorGuidelines			24	https://www.journals.uio.no/index.php/prismet/about/editorialPolicies#openAccessPolicy			CC BY-NC		https://www.journals.uio.no/index.php/prismet/about/submissions#copyrightNotice	Yes		True
Przeglad Dermatologiczny	http://www.termedia.pl/Journal/Przeglad_Dermatologiczny-56	Dermatology Review	0033-2526	2084-9893	Termedia Publishing House	Polish Dermatological Association	Termedia Publishing House - Bentus	Poland	No	http://www.termedia.pl/Journal/Przeglad_Dermatologiczny-56/For-authors				http://www.termedia.pl/Journal/Przeglad_Dermatologiczny-56/For-authors								Polish Medical Library (GBL)		http://www.termedia.pl/Journal/Przeglad_Dermatologiczny-56/Indexing	Yes	DOI			2009	PDF, HTML	dermatology	English, Polish	http://www.termedia.pl/Journal/Przeglad_Dermatologiczny-56/Info	Double blind peer review	http://www.termedia.pl/Journal/Przeglad_Dermatologiczny-56/For-authors	http://www.termedia.pl/Journal/Przeglad_Dermatologiczny-56/For-authors	http://www.termedia.pl/Journal/Przeglad_Dermatologiczny-56/For-authors	Yes	http://www.termedia.pl/Journal/Przeglad_Dermatologiczny-56/For-authors	12	http://www.termedia.pl/Journal/Przeglad_Dermatologiczny-56/Info			CC BY-NC-SA		http://www.termedia.pl/Journal/Przeglad_Dermatologiczny-56/Info	Yes		True
Psyche: A Journal of Entomology	https://www.hindawi.com/journals/psyche/		0033-2615	1687-7438	Hindawi Limited		Hindawi	United Kingdom	Yes	https://www.hindawi.com/journals/psyche/apc/	600	USD - US Dollar		https://www.hindawi.com/journals/psyche/apc/					Yes	https://www.hindawi.com/journals/psyche/apc/	LOCKSS, Portico			https://www.hindawi.com/journals/psyche/ai/	Yes	DOI			1874	PDF, HTML, ePUB	entomology, insect	English	https://www.hindawi.com/journals/psyche/editors/	Blind peer review	https://www.hindawi.com/journals/psyche/workflow/	https://www.hindawi.com/journals/psyche/aims/	https://www.hindawi.com/journals/psyche/guidelines/	Yes	https://www.hindawi.com/journals/psyche/ethics/	15	https://www.hindawi.com/journals/psyche/	Yes	https://www.hindawi.com/journals/psyche/2015/134630/	CC BY		https://www.hindawi.com/journals/psyche/guidelines/	Yes	Sherpa/Romeo	True
Psychologica Belgica	http://www.psychologicabelgica.com/		0033-2879	2054-670X	Ubiquity Press	Belgian Association for Psychological Science	Ubiquity Press	United Kingdom	Yes	http://www.psychologicabelgica.com/about/submissions/	300	GBP - Pound Sterling		http://www.psychologicabelgica.com/about/submissions/							LOCKSS, CLOCKSS			http://www.psychologicabelgica.com/about/editorialPolicies#archiving	Yes	DOI	Yes	http://www.psychologicabelgica.com/article/view/pb.au	2004	PDF, HTML, XML	experimental psychology, social psychology, cognitive psychology, personality psychology, psychopathology, health psychology	English	http://www.psychologicabelgica.com/about/editorialTeam	Double blind peer review	http://www.psychologicabelgica.com/about/editorialPolicies#peerReviewProcess	http://www.psychologicabelgica.com/about/editorialPolicies#focusAndScope	http://www.psychologicabelgica.com/about/submissions#authorGuidelines	Yes	http://www.psychologicabelgica.com/about/editorialPolicies#custom-0	4	http://www.psychologicabelgica.com/about/editorialPolicies#openAccessPolicy	Yes	http://www.psychologicabelgica.com/article/view/pb.au/227	CC BY		http://www.psychologicabelgica.com/about/editorialPolicies#openAccessPolicy	Yes	Sherpa/Romeo	True
Quaderni di Sociologia	http://qds.revues.org		0033-4952	2421-5848	Rosenberg & Sellier		revues.org	Italy	No	http://qds.revues.org/?page=informations				http://qds.revues.org/?page=informations											Yes	DOI, Handles	Yes	https://logs.openedition.org/awstats.pl?config=qds	2010	HTML	Sociology of Work, Gender Studies, Sociology of Consumption, Sociology of Culture, Urban Sociology, Sociology of Health	English, Italian	http://qds.revues.org/494	Double blind peer review	http://qds.revues.org/?page=informations	http://qds.revues.org/506	http://qds.revues.org/497			24	http://qds.revues.org/?page=informations	Yes	http://qds.revues.org/391	CC BY-NC-ND		http://qds.revues.org/?page=informations	Yes		False
Reinwardtia	http://e-journal.biologi.lipi.go.id/index.php/reinwardtia	Reinwardtia: A Journal on Taxonomy Botany, Plant Sociology and Ecology	0034-365X	2337-8824	Indonesian Institute of Sciences	Reserch Center for Biology	OJS	Indonesia	No	http://e-journal.biologi.lipi.go.id/index.php/reinwardtia/about/editorialPolicies#custom-2				http://e-journal.biologi.lipi.go.id/index.php/reinwardtia/about/editorialPolicies#custom-2											Yes			http://e-journal.biologi.lipi.go.id/index.php/reinwardtia/about/statistics?statisticsYear=2015	1970	PDF	plant taxonomy, ecology, ethnobotany	English	http://e-journal.biologi.lipi.go.id/index.php/reinwardtia/about/editorialTeam	Blind peer review	http://e-journal.biologi.lipi.go.id/index.php/reinwardtia/about/editorialPolicies#peerReviewProcess	http://e-journal.biologi.lipi.go.id/index.php/reinwardtia/about/editorialPolicies#focusAndScope	http://e-journal.biologi.lipi.go.id/index.php/reinwardtia/about/submissions#authorGuidelines	Yes	http://e-journal.biologi.lipi.go.id/index.php/reinwardtia/about/editorialPolicies#custom-1	12	http://e-journal.biologi.lipi.go.id/index.php/reinwardtia/about/editorialPolicies#openAccessPolicy		http://e-journal.biologi.lipi.go.id/index.php/reinwardtia/index	CC BY-NC-SA		http://e-journal.biologi.lipi.go.id/index.php/reinwardtia/about/editorialPolicies#openAccessPolicy	Yes		False
Rheumatology	http://www.termedia.pl/Czasopismo/Reumatologia-18	Reumatologia	0034-6233	2084-9834	Termedia Publishing House	National Institute of Geriatrics, Rheumatology and Rehabilitation and the Polish Rheumatological Society	Termedia Publishing House - Bentus	Poland	No	http://www.termedia.pl/Journal/Reumatologia-18/For-authors				http://www.termedia.pl/Journal/Reumatologia-18/For-authors							PMC/Europe PMC/PMC Canada			https://www.ncbi.nlm.nih.gov/nlmcatalog/101693	Yes	DOI			2005	PDF, HTML	rheumatology	English	http://www.termedia.pl/Journal/Reumatologia-18/Info	Blind peer review	http://www.termedia.pl/Journal/Reumatologia-18/For-authors	http://www.termedia.pl/Journal/Reumatologia-18/For-authors	http://www.termedia.pl/Journal/Reumatologia-18/For-authors	Yes	http://www.termedia.pl/Journal/Reumatologia-18/For-authors	10	http://www.termedia.pl/Journal/Reumatologia-18/Info			CC BY-NC-SA		http://www.termedia.pl/Journal/Reumatologia-18/Info	Yes	PMC	True
Revista Argentina de Cardiología	http://ppct.caicyt.gov.ar/index.php/rac/index		0034-7000	1850-3748	Sociedad Argentina de Cardiología	Sociedad Argentina de Cardiologia	OJS	Argentina	No	http://ppct.caicyt.gov.ar/files/site/cardio-reglamento-es.pdf				http://ppct.caicyt.gov.ar/files/site/cardio-reglamento-es.pdf										http://ppct.caicyt.gov.ar/index.php/rac	Yes				2010	PDF	cardiology	English, Spanish; Castilian	http://ppct.caicyt.gov.ar/index.php/rac/about/displayMembership/45	Double blind peer review	http://ppct.caicyt.gov.ar/index.php/rac/about/editorialPolicies#peerReviewProcess	http://ppct.caicyt.gov.ar/index.php/rac/about/editorialPolicies#focusAndScope	http://ppct.caicyt.gov.ar/files/site/cardio-reglamento-es.pdf			16	http://ppct.caicyt.gov.ar/index.php/rac/about/editorialPolicies#openAccessPolicy			CC BY-NC-SA		http://ppct.caicyt.gov.ar/index.php/rac/about/submissions#copyrightNotice	Yes		False
Revista Brasileira de Anestesiologia	http://www.scielo.br/scielo.php/script_sci_serial/pid_0034-7094/lng_en/nrm_iso		0034-7094	1806-907X	Sociedade Brasileira de Anestesiologia	Sociedade Brasileira de Anestesiologia	SciELO Brazil	Brazil	No	http://www.scielo.br/revistas/rba/iinstruc.htm#03				http://www.scielo.br/revistas/rba/iinstruc.htm#03											Yes	DOI	Yes	http://www.scielo.br/statjournal.php?lang=en&issn=0034-7094	2001	PDF, HTML, XML	biological sciences, health sciences	English, Portuguese, Spanish; Castilian	http://www.scielo.br/revistas/rba/iedboard.htm	Double blind peer review	http://www.scielo.br/revistas/rba/iinstruc.htm	http://www.scielo.br/revistas/rba/iaboutj.htm	http://www.scielo.br/revistas/rba/iinstruc.htm			21	http://www.scielo.br/revistas/rba/isubscrp.htm	Yes	http://www.scielo.br/scielo.php?script=sci_arttext&pid=S0034-70942014000600391&lng=en&nrm=iso&tlng=en	CC BY-NC-ND		http://www.scielo.br/scielo.php/script_sci_serial/pid_0034-7094/lng_en/nrm_iso	Yes		False
Revista Brasileira de Economia	http://www.scielo.br/scielo.php/script_sci_serial/pid_0034-7140/lng_en/nrm_iso		0034-7140	1806-9134	Fundação Getúlio Vargas		SciELO Brazil	Brazil	Yes	http://www.scielo.br/revistas/rbe/iinstruc.htm	360	BRL - Brazilian Real		http://www.scielo.br/revistas/rbe/iinstruc.htm#send											Yes	DOI	Yes	http://www.scielo.br/statjournal.php?lang=en&issn=0034-7140	1999	PDF, HTML, XML	applied social sciences	English, Portuguese	http://www.scielo.br/revistas/rbe/iedboard.htm	Peer review	http://www.scielo.br/revistas/rbe/iinstruc.htm	http://www.scielo.br/revistas/rbe/iinstruc.htm	http://www.scielo.br/revistas/rbe/iinstruc.htm			20	http://www.scielo.br/revistas/rbe/isubscrp.htm	Yes	http://www.scielo.br/scielo.php?script=sci_arttext&pid=S0034-71402015000100003&lng=en&nrm=iso&tlng=en	CC BY		http://www.scielo.br/revistas/rbe/isubscrp.htm	Yes		False
Revista Brasileira de Enfermagem	http://www.scielo.br/scielo.php?script=sci_serial&pid=0034-7167&lng=en&nrm=iso		0034-7167	1984-0446	Associação Brasileira de Enfermagem		SciELO Brazil	Brazil	Yes	http://www.scielo.br/revistas/reben/iinstruc.htm	1100	BRL - Brazilian Real	Yes	http://www.scielo.br/revistas/reben/iinstruc.htm	220	BRL - Brazilian Real													1983	PDF, HTML, XML	nursing	English, Portuguese, Spanish; Castilian	http://www.scielo.br/revistas/reben/iedboard.htm	Double blind peer review	http://www.scielo.br/revistas/reben/iinstruc.htm	http://www.scielo.br/revistas/reben/iinstruc.htm	http://www.scielo.br/revistas/reben/iinstruc.htm			21	http://www.scielo.br/revistas/reben/iaboutj.htm	Yes	http://www.scielo.br/scielo.php?script=sci_arttext&pid=S0034-71672016000601017&lng=en&nrm=iso&tlng=en	CC BY		http://www.scielo.br/revistas/reben/iaboutj.htm			False
Revista Brasileira de Estudos Pedagógicos	http://rbep.inep.gov.br/index.php/RBEP	RBEP	0034-7183	2176-6681	Instituto Nacional de Estudos e Pesquisas Educacionais Anísio Teixeira	Instituto Nacional de Estudos e Pesquisas Educacionais Anísio Teixeira	OJS	Brazil	No	http://www.rbep.inep.gov.br/index.php/RBEP/about/editorialPolicies#custom0				http://www.rbep.inep.gov.br/index.php/RBEP/about/editorialPolicies#custom0											Yes	DOI			2007	PDF	Brazilian education, educational policies, pedagogy	English, Portuguese, Spanish; Castilian	http://rbep.inep.gov.br/index.php/RBEP/about/editorialTeam	Blind peer review	http://rbep.inep.gov.br/index.php/RBEP/about/editorialPolicies#peerReviewProcess	http://rbep.inep.gov.br/index.php/RBEP/about/editorialPolicies#focusAndScope	http://rbep.inep.gov.br/index.php/RBEP/about/submissions#authorGuidelines			24	http://rbep.inep.gov.br/index.php/RBEP/about/editorialPolicies#openAccessPolicy			CC BY-NC		http://rbep.inep.gov.br/index.php/RBEP/about/editorialPolicies#openAccessPolicy	Yes		False
Revista Brasileira de Odontologia	http://revista.aborj.org.br/index.php/rbo	Brazilian Journal of Dentistry	0034-7272	1984-3747	Associação Brasileira de Odontologia	Associação Brasileira de Odontologia - Rio de Janeiro	OJS	Brazil	No	http://revista.aborj.org.br/index.php/rbo/about/editorialPolicies#focusAndScope				http://revista.aborj.org.br/index.php/rbo/about/editorialPolicies#focusAndScope										http://revista.aborj.org.br/index.php/rbo/about/editorialPolicies#openAccessPolicy	Yes				2008	PDF, HTML	dentistry, oral medicine, odontology	English	http://revista.aborj.org.br/index.php/rbo/about/editorialTeam	Blind peer review	http://revista.aborj.org.br/index.php/rbo/about/editorialPolicies#sectionPolicies	http://revista.aborj.org.br/index.php/rbo/about/editorialPolicies#focusAndScope	http://revista.aborj.org.br/index.php/rbo/about/submissions#authorGuidelines	Yes	http://revista.aborj.org.br/index.php/rbo/about/submissions#authorGuidelines	13	http://revista.aborj.org.br/index.php/rbo/about/editorialPolicies#openAccessPolicy			CC BY		http://revista.aborj.org.br/index.php/rbo/about/editorialPolicies#custom-3	Yes		False
Revista Brasileira de Oftalmologia	http://www.scielo.br/scielo.php?script=sci_serial&lng=pt&pid=0034-7280&nrm=iso		0034-7280	1982-8551	Sociedade Brasileira de Oftalmologia		SciELO Brazil	Brazil	No	http://www.scielo.br/revistas/rbof/iinstruc.htm#001				http://www.scielo.br/revistas/rbof/iinstruc.htm#001										http://www.scielo.br/revistas/rbof/iinstruc.htm	Yes				2007	PDF, HTML, XML	ophthalmology	English, Portuguese, Spanish; Castilian	http://www.scielo.br/revistas/rbof/iedboard.htm	Peer review	http://www.scielo.br/revistas/rbof/iinstruc.htm	http://www.scielo.br/revistas/rbof/iinstruc.htm	http://www.scielo.br/revistas/rbof/iinstruc.htm	Yes	http://www.scielo.br/revistas/rbof/iinstruc.htm	13	http://www.scielo.br/revistas/rbof/isubscrp.htm	Yes	http://www.scielo.br/scielo.php?script=sci_arttext&pid=S0034-72802015000500284&lng=en&nrm=iso/&tlng=en	CC BY		http://www.scielo.br/scielo.php?script=sci_serial&lng=pt&pid=0034-7280&nrm=iso	Yes		False
Revista Brasileira de Otorrinolaringologia	http://www.scielo.br/scielo.php/script_sci_serial/pid_0034-7299/lng_pt/nrm_iso		0034-7299		Sociedade Brasileira de Otorrinolaringologia		SciELO Brazil		No Information																				2001		health sciences
Revista Brasileira de Política Internacional	http://www.scielo.br/scielo.php?script=sci_serial&pid=0034-7329&lng=pt&nrm=iso		0034-7329	1983-3121	Instituto Brasileiro de Relações Internacionais		SciELO Brazil	Brazil	No	http://www.scielo.br/revistas/rbpi/iinstruc.htm				http://www.scielo.br/revistas/rbpi/iinstruc.htm											Yes		Yes	http://analytics.scielo.org/w/accesses?document=S0034-73292015000200005&collection=scl	1997	PDF, HTML, XML	international relations, brazilian foreign policies	English, Portuguese, Spanish; Castilian	http://www.scielo.br/revistas/rbpi/iedboard.htm	Double blind peer review	http://www.scielo.br/revistas/rbpi/iinstruc.htm#001	http://www.scielo.br/revistas/rbpi/iinstruc.htm	http://www.scielo.br/revistas/rbpi/iinstruc.htm#002	Yes	http://www.scielo.br/revistas/rbpi/iinstruc.htm	14	http://www.scielo.br/revistas/rbpi/isubscrp.htm	Yes	http://www.scielo.br/scielo.php?script=sci_arttext&pid=S0034-73292016000200202&lng=en&nrm=iso&tlng=en	CC BY		http://www.scielo.br/revistas/rbpi/iaboutj.htm#003	Yes		False
Revista Ceres	http://www.scielo.br/scielo.php?script=sci_serial&pid=0034-737X&lng=en&nrm=iso		0034-737X	2177-3491	Universidade Federal De Viçosa		SciELO Brazil	Brazil	Yes	http://www.scielo.br/revistas/rceres/iinstruc.htm	250	BRL - Brazilian Real		http://www.scielo.br/revistas/rceres/iinstruc.htm											Yes	DOI			2010	PDF, HTML, XML	plant culture, biotechnology, veterinary medicine, food science, agricultural egineering	English, Portuguese	http://www.scielo.br/revistas/rceres/iedboard.htm	Peer review	http://www.scielo.br/revistas/rceres/iinstruc.htm	http://www.scielo.br/revistas/rceres/iinstruc.htm	http://www.scielo.br/revistas/rceres/iinstruc.htm			16	http://www.scielo.br/revistas/rceres/isubscrp.htm	Yes	http://www.scielo.br/scielo.php?script=sci_arttext&pid=S0034-737X2015000500438&lng=en&nrm=iso&tlng=pt	CC BY		http://www.scielo.br/revistas/rceres/iaboutj.htm			False
Revista Chilena de Entomología	http://www.biotaxa.org/rce		0034-740X	0718-8994	Sociedad Chilena de Entomología	Sociedad Chilena de Entomología	OJS	Chile	No	https://biotaxa.org/rce				https://biotaxa.org/rce											Yes				2010	PDF	entomology, taxonomy, insects	English, Spanish; Castilian	https://biotaxa.org/rce/about/editorialTeam	Blind peer review	https://biotaxa.org/rce/about/editorialPolicies#peerReviewProcess	https://biotaxa.org/rce/about/editorialPolicies#focusAndScope	https://biotaxa.org/rce/about/submissions#authorGuidelines			4	https://biotaxa.org/rce/about/editorialPolicies#openAccessPolicy			CC BY-NC		https://www.biotaxa.org/rce/about/submissions#copyrightNotice	Yes		False
Revista Cubana de Cirugía	http://www.revcirugia.sld.cu/index.php/cir		0034-7493	1561-2945	Editorial Ciencias Médicas	Sociedad Cubana de Cirugía	www.sld.cu	Cuba	No	http://scielo.sld.cu/revistas/cir/eaboutj.htm				http://scielo.sld.cu/revistas/cir/eaboutj.htm										http://scielo.sld.cu/scielo.php?script=sci_serial&pid=0034-7493&lng=es&nrm=iso		DOI			1995	PDF, HTML	surgery	Spanish; Castilian	http://scielo.sld.cu/revistas/cir/eedboard.htm	Peer review	http://www.revcirugia.sld.cu/index.php/cir/about/editorialPolicies#peerReviewProcess	http://scielo.sld.cu/revistas/cir/einstruc.htm#Alcance	http://scielo.sld.cu/revistas/cir/einstruc.htm#Forma			4	http://www.revcirugia.sld.cu/index.php/cir/about/editorialPolicies#openAccessPolicy			CC BY-NC-SA		http://scielo.sld.cu/revistas/cir/eaboutj.htm#Copyright	Yes		True
Revista Cubana de Estomatología	http://scielo.sld.cu/scielo.php?script=sci_serial&pid=0034-7507&lng=es&nrm=iso		0034-7507	1561-297X	Editorial Ciencias Médicas	Sociedad Cubana de Estomatología	www.sld.cu	Cuba	No	http://scielo.sld.cu/revistas/est/eaboutj.htm				http://scielo.sld.cu/revistas/est/eaboutj.htm											Yes		Yes	http://scielo.sld.cu/statjournal.php?lang=es&issn=0034-7507&collection=cub	1996	PDF, HTML	dental aesthetics, dental implants, pulp diseases	Spanish; Castilian	http://scielo.sld.cu/revistas/est/eedboard.htm	Peer review	http://scielo.sld.cu/revistas/est/einstruc.htm	http://scielo.sld.cu/revistas/est/einstruc.htm	http://scielo.sld.cu/revistas/est/einstruc.htm			4	http://scielo.sld.cu/revistas/est/esubscrp.htm	Yes	http://scielo.sld.cu/scielo.php?script=sci_arttext&pid=S0034-75072016000300004&lng=es&nrm=iso&tlng=es	CC BY-NC-SA		http://scielo.sld.cu/revistas/est/einstruc.htm	Yes		False
Revista Cubana de Farmacia	http://scielo.sld.cu/scielo.php?script=sci_serial&pid=0034-7515&lng=es&nrm=iso		0034-7515	1561-2988	Editorial Ciencias Médicas	Sociedad Cubana de Farmacia e Industria Médico-Farmacéutica de Cuba	www.sld.cu	Cuba	No	http://scielo.sld.cu/revistas/far/eaboutj.htm				http://scielo.sld.cu/revistas/far/eaboutj.htm										http://scielo.sld.cu/scielo.php?script=sci_serial&pid=0034-7515&lng=es&nrm=iso	Yes		Yes	http://scielo.sld.cu/statjournal.php?lang=es&issn=0034-7515&collection=cub	1995	PDF, HTML	Cuban pharmacopoeia, drug development	Spanish; Castilian	http://scielo.sld.cu/revistas/far/eedboard.htm	Peer review	http://scielo.sld.cu/revistas/far/einstruc.htm	http://scielo.sld.cu/revistas/far/einstruc.htm	http://scielo.sld.cu/revistas/far/einstruc.htm			4	http://scielo.sld.cu/revistas/far/esubscrp.htm			CC BY-NC-SA		http://scielo.sld.cu/revistas/far/einstruc.htm	Yes		False
Revista Cubana de Pediatría	http://scielo.sld.cu/scielo.php?script=sci_serial&pid=0034-7531&lng=es&nrm=iso		0034-7531	1561-3119	Editorial Ciencias Médicas	Sociedad Cubana de Pediatría	www.sld.cu	Cuba	No	http://scielo.sld.cu/revistas/ped/eaboutj.htm				http://scielo.sld.cu/revistas/ped/eaboutj.htm										http://scielo.sld.cu/revistas/ped/einstruc.htm	Yes		Yes	http://scielo.sld.cu/revistas/ped/esubscrp.htm	1995	PDF, HTML	dentition, baby diseases	Spanish; Castilian	http://scielo.sld.cu/revistas/ped/eedboard.htm	Blind peer review	http://scielo.sld.cu/revistas/ped/einstruc.htm	http://scielo.sld.cu/scielo.php?script=sci_serial&pid=0034-7531&lng=es&nrm=iso	http://scielo.sld.cu/revistas/ped/einstruc.htm			4	http://scielo.sld.cu/revistas/ped/esubscrp.htm	Yes	http://scielo.sld.cu/scielo.php?script=sci_arttext&pid=S0034-75312016000300005&lng=es&nrm=iso&tlng=es	CC BY-NC-SA		http://scielo.sld.cu/revistas/ped/eaboutj.htm	Yes		False
RAE: Revista de Administração de Empresas	http://www.scielo.br/scielo.php?script=sci_serial&pid=0034-7590&lng=en&nrm=iso	RAE	0034-7590	2178-938X	Fundação Getulio Vargas	Fundação Getulio Vargas	SciELO Brazil	Brazil	No	http://www.scielo.br/revistas/rae/iinstruc.htm				http://www.scielo.br/revistas/rae/iinstruc.htm										http://bibliotecadigital.fgv.br/ojs/index.php/rae	Yes	DOI			1961	PDF	social sciences, administration, management	English, Portuguese, Spanish; Castilian	http://www.scielo.br/revistas/rae/iedboard.htm	Double blind peer review	http://www.scielo.br/revistas/rae/iinstruc.htm	http://www.scielo.br/revistas/rae/iaboutj.htm	http://www.scielo.br/revistas/rae/iinstruc.htm			32	http://www.scielo.br/revistas/rae/isubscrp.htm	Yes	http://www.scielo.br/scielo.php?script=sci_arttext&pid=S0034-75902016000300302&lng=en&nrm=iso&tlng=en	CC BY		http://www.scielo.br/revistas/rae/iaboutj.htm	Yes	Sherpa/Romeo, Diadorim	False
Revista de Administração Pública	http://www.scielo.br/scielo.php?script=sci_serial&pid=0034-7612&lng=en&nrm=iso	RAP	0034-7612		Fundação Getúlio Vargas		SciELO Brazil	Brazil	No	http://www.scielo.br/revistas/rap/iinstruc.htm#03				http://www.scielo.br/revistas/rap/iinstruc.htm#03										http://www.scielo.br/revistas/rap/iinstruc.htm	Yes		Yes	http://www.scielo.br/statjournal.php?lang=en&issn=0034-7612	2006	PDF, HTML, XML	applied social sciences, administration, public administration	English, Portuguese, Spanish; Castilian	http://www.scielo.br/revistas/rap/iedboard.htm	Double blind peer review	http://www.scielo.br/revistas/rap/iinstruc.htm	http://www.scielo.br/revistas/rap/iinstruc.htm	http://www.scielo.br/revistas/rap/iinstruc.htm	Yes	http://www.scielo.br/revistas/rap/iaboutj.htm#03	12	http://www.scielo.br/revistas/rap/isubscrp.htm	Yes	http://www.scielo.br/scielo.php?script=sci_arttext&pid=S0034-76122015000601375&lng=en&nrm=iso&tlng=en	CC BY		http://www.scielo.br/revistas/rap/isubscrp.htm	Yes		False
Revista de Biología Tropical	http://revistas.ucr.ac.cr/index.php/rbt	International Journal of Tropical Biology and Conservancy	0034-7744	0034-7744	Vicerractoría Investigación	University of Costa Rica	OJS	Costa Rica	No	http://revistas.ucr.ac.cr/index.php/rbt/about/submissions#authorGuidelines				http://revistas.ucr.ac.cr/index.php/rbt/about/editorialPolicies#focusAndScope											Yes	DOI			1998	PDF, HTML	tropical biology, conservation, biology, biomedicene	English, Spanish; Castilian	http://revistas.ucr.ac.cr/index.php/rbt/about/editorialPolicies#focusAndScope	Peer review	http://revistas.ucr.ac.cr/index.php/rbt/about/editorialPolicies#focusAndScope	http://revistas.ucr.ac.cr/index.php/rbt/about/editorialPolicies#focusAndScope	http://revistas.ucr.ac.cr/index.php/rbt/about/submissions#authorGuidelines	Yes	http://revistas.ucr.ac.cr/index.php/index/about	5	http://revistas.ucr.ac.cr/index.php/sociales/about/editorialPolicies#openAccessPolicy	Yes	http://revistas.ucr.ac.cr/index.php/index/about	CC BY		http://revistas.ucr.ac.cr/index.php/rbt/about/submissions#copyrightNotice	Yes	Sherpa/Romeo	False
Revista de Dialectología y Tradiciones Populares	http://rdtp.revistas.csic.es		0034-7981	1988-8457	Consejo Superior de Investigaciones Científicas		OJS	Spain	No	http://rdtp.revistas.csic.es/index.php/rdtp/about/editorialPolicies#openAccessPolicy				http://rdtp.revistas.csic.es/index.php/rdtp/about/editorialPolicies												DOI			1996	PDF	ethnography, cultural studies, popular culture, oral tradition, sociolinguistics	English, Spanish; Castilian	http://rdtp.revistas.csic.es/index.php/rdtp/about/editorialTeam	Double blind peer review	http://rdtp.revistas.csic.es/index.php/rdtp/about/editorialPolicies#peerReviewProcess	http://rdtp.revistas.csic.es/index.php/rdtp/about/editorialPolicies#focusAndScope	http://rdtp.revistas.csic.es/index.php/rdtp/about/submissions#authorGuidelines			48	http://rdtp.revistas.csic.es/index.php/rdtp/about/editorialPolicies#openAccessPolicy			CC BY-NC		http://rdtp.revistas.csic.es/index.php/rdtp	Yes		False
Revista de Filosofía	http://www.revistafilosofia.uchile.cl		0034-8236	0718-4360	Universidad de Chile	Sociedad Chilena de Filosofía	OJS	Chile	No	http://www.revistafilosofia.uchile.cl/index.php/RDF/about/submissions#authorGuidelines				http://www.revistafilosofia.uchile.cl/index.php/RDF/about/submissions#authorGuidelines							CLOCKSS			http://www.revistafilosofia.uchile.cl/index.php/RDF/about/editorialPolicies#archiving					2006	PDF	problems of philosophy, history of philosophy	Spanish; Castilian	http://www.revistafilosofia.uchile.cl/index.php/RDF/about/displayMembership/93	Double blind peer review	http://www.revistafilosofia.uchile.cl/index.php/RDF/about/editorialPolicies#peerReviewProcess	http://www.revistafilosofia.uchile.cl/index.php/RDF/about/editorialPolicies#focusAndScope	http://www.revistafilosofia.uchile.cl/index.php/RDF/about/submissions#authorGuidelines			12	http://www.revistafilosofia.uchile.cl/index.php/RDF/about/editorialPolicies#openAccessPolicy			CC BY-NC-ND		http://www.revistafilosofia.uchile.cl/index.php/RDF/about/submissions#copyrightNotice	Yes		True
Revista de Filosofia	http://revistas.ucm.es/index.php/RESF		0034-8244	1988-284X	Universidad Complutense de Madrid	Universidad Complutense de Madrid	Open Journal System/OJS	Spain	No	http://revistas.ucm.es/index.php/RESF/about/submissions#copyrightNotice				http://revistas.ucm.es/index.php/RESF/about/submissions#copyrightNotice											Yes				1987	PDF	philosophy, epistemology, metaphysics, ontology, ethics, logic	English, French, German, Italian, Portuguese, Spanish; Castilian	http://revistas.ucm.es/index.php/RESF/pages/view/equipo	Double blind peer review	http://revistas.ucm.es/index.php/RESF/about/submissions	http://revistas.ucm.es/index.php/RESF/about/editorialPolicies#focusAndScope	http://revistas.ucm.es/index.php/RESF/about/submissions	Yes	http://revistas.ucm.es/index.php/RESF/about/editorialPolicies#custom-3	32	http://revistas.ucm.es/index.php/RESF/about/editorialPolicies#openAccessPolicy			CC BY		http://revistas.ucm.es/index.php/RESF/about/submissions#copyrightNotice	Yes		False
Revista de História	http://revhistoria.usp.br/index.php/br/		0034-8309	2316-9141	Universidade de São Paulo	Universidade de São Paulo, Faculdade de Filosofia, Letras e Ciências Humanas, Departamento de História	OJS	Brazil	No	http://revhistoria.usp.br/index.php/br/publique				http://revhistoria.usp.br/index.php/br/publique									Cariniana Network	http://www.revistas.usp.br/revhistoria/about/editorialPolicies#archiving	Yes				1950	PDF	human sciences, historiography, history	Portuguese	http://revhistoria.usp.br/index.php/br/equipe/editorial	Double blind peer review	http://revhistoria.usp.br/index.php/br/publique	http://revhistoria.usp.br/index.php/br/publique	http://revhistoria.usp.br/index.php/br/publique			24	http://revhistoria.usp.br/index.php/br/publique			CC BY-NC		http://revhistoria.usp.br/index.php/br/publique	Yes		True
Revista de Indias	http://revistadeindias.revistas.csic.es		0034-8341	1988-3188	Consejo Superior de Investigaciones Científicas		OJS	Spain	No	http://revistadeindias.revistas.csic.es/index.php/revistadeindias/about/editorialPolicies				http://revistadeindias.revistas.csic.es/index.php/revistadeindias/about/editorialPolicies												DOI			1996	PDF	Latin American history, Pre-Columbian history, Pre-Hispanic history, sociology, politics	English, French, Portuguese, Spanish; Castilian	http://revistadeindias.revistas.csic.es/index.php/revistadeindias/about/editorialTeam	Peer review	http://revistadeindias.revistas.csic.es/index.php/revistadeindias/about/editorialPolicies#peerReviewProcess	http://revistadeindias.revistas.csic.es/index.php/revistadeindias/about/editorialPolicies#focusAndScope	http://revistadeindias.revistas.csic.es/index.php/revistadeindias/about/submissions#authorGuidelines			48	http://revistadeindias.revistas.csic.es/index.php/revistadeindias/about/editorialPolicies#openAccessPolicy			CC BY-NC		http://revistadeindias.revistas.csic.es/index.php/revistadeindias/index	Yes		False
Revista de Literatura	http://revistadeliteratura.revistas.csic.es/		0034-849X	1988-4192	Consejo Superior de Investigaciones Cientificas		Consejo Superior de Investigaciones Científicas	Spain	No	http://revistadeliteratura.revistas.csic.es/index.php/revistadeliteratura/about/editorialPolicies#openAccessPolicy				http://revistadeliteratura.revistas.csic.es/index.php/revistadeliteratura/about/editorialPolicies#openAccessPolicy												DOI			2001	PDF	analysis and literary criticism, aesthetics and literary style, rhetoric, textual criticism, literature	Spanish; Castilian	http://revistadeliteratura.revistas.csic.es/index.php/revistadeliteratura/about/editorialTeam	Double blind peer review	http://revistadeliteratura.revistas.csic.es/index.php/revistadeliteratura/about/editorialPolicies#peerReviewProcess	http://revistadeliteratura.revistas.csic.es/index.php/revistadeliteratura/about/editorialPolicies#focusAndScope	http://revistadeliteratura.revistas.csic.es/index.php/revistadeliteratura/about/submissions#authorGuidelines		http://revistadeliteratura.revistas.csic.es/index.php/revistadeliteratura/about/submissions#copyrightNotice	48	http://revistadeliteratura.revistas.csic.es/index.php/revistadeliteratura/about/editorialPolicies#openAccessPolicy	Yes	http://revistadeliteratura.revistas.csic.es/index.php/revistadeliteratura/article/view/342	CC BY-NC		http://revistadeliteratura.revistas.csic.es/index.php/revistadeliteratura/about/submissions#copyrightNotice	Yes		False
Revista de Metalurgia	http://revistademetalurgia.revistas.csic.es		0034-8570	1988-4222	Consejo Superior de Investigaciones Científicas		OJS	Spain	No	http://revistademetalurgia.revistas.csic.es/index.php/revistademetalurgia/about/editorialPolicies				http://revistademetalurgia.revistas.csic.es/index.php/revistademetalurgia/about/editorialPolicies												DOI			1995	PDF, HTML, XML	mechanical engineering, machine design, welding, cutting, industrial processes, materials testing	English, Spanish; Castilian	http://revistademetalurgia.revistas.csic.es/index.php/revistademetalurgia/about/editorialTeam	Double blind peer review	http://revistademetalurgia.revistas.csic.es/index.php/revistademetalurgia/about/editorialPolicies#peerReviewProcess	http://revistademetalurgia.revistas.csic.es/index.php/revistademetalurgia/about/editorialPolicies#focusAndScope	http://revistademetalurgia.revistas.csic.es/index.php/revistademetalurgia/about/submissions#authorGuidelines			30	http://revistademetalurgia.revistas.csic.es/index.php/revistademetalurgia/about/editorialPolicies#openAccessPolicy	Yes	http://revistademetalurgia.revistas.csic.es/index.php/revistademetalurgia/article/view/1332/1399	CC BY-NC		http://revistademetalurgia.revistas.csic.es/index.php/revistademetalurgia/index	Yes		False
Revista de Pedagogie	http://revped.ise.ro/about-jp/	Journal of Pedagogy	0034-8678	2559-639X	Institutul de Stiinte ale Educatiei (Institute of Educational Sciences)		WordPress	Romania	No	http://revped.ise.ro/editorial-policy/				http://revped.ise.ro/editorial-policy/											Yes	DOI			2017	PDF	education sciences, educational policy, educational theory, curriculum, assessment in education	English, Romanian; Moldavian; Moldovan	http://revped.ise.ro/editorial-team/	Double blind peer review	http://revped.ise.ro/editorial-policy/	http://revped.ise.ro/about-jp/	http://revped.ise.ro/the-writer-guide-2/	Yes	http://revped.ise.ro/editorial-policy/	20	http://revped.ise.ro/editorial-policy/	Yes	http://revped.ise.ro/category/2017-en/	CC BY-NC-SA		http://revped.ise.ro/about-jp/	Yes		True
Revista de Saúde Pública	http://www.scielo.br/scielo.php?script=sci_serial&pid=0034-8910&lng=en&nrm=iso		0034-8910	1518-8787	Universidade de São Paulo		SciELO Brazil	Brazil	Yes	http://www.scielo.br/revistas/rsp/iinstruc.htm	1800	BRL - Brazilian Real		http://www.scielo.br/revistas/rsp/iinstruc.htm										http://www.scielo.br/revistas/rsp/iinstruc.htm	Yes				1967	PDF, HTML, XML	biological sciences, health sciences	English, Portuguese, Spanish; Castilian	http://www.scielo.br/revistas/rsp/iedboard.htm	Peer review	http://www.scielo.br/revistas/rsp/iinstruc.htm	http://www.scielo.br/revistas/rsp/iaboutj.htm	http://www.scielo.br/revistas/rsp/iinstruc.htm	Yes	http://www.scielo.br/revistas/rsp/iinstruc.htm	13	http://www.scielo.br/revistas/rsp/isubscrp.htm	Yes	http://www.scielo.br/scielo.php?script=sci_arttext&pid=S0034-89102015000100204&lng=en&nrm=iso&tlng=en	CC BY		http://www.scielo.br/revistas/rsp/isubscrp.htm	Yes		False
Interamerican Journal of Psychology	https://journal.sipsych.org/index.php/IJP/index	Revista Interamericana de Psicología	0034-9690		University of Florida		Redalyc	United States	No	https://journal.sipsych.org/index.php/IJP/about/editorialPolicies#openAccessPolicy				https://journal.sipsych.org/index.php/IJP/about/editorialPolicies#openAccessPolicy							CLOCKSS			http://journals.fcla.edu/ijp/issue/archive	Yes		Yes	http://journals.fcla.edu/ijp/manager/statistics	2011	PDF	psychology	English, French, Portuguese, Spanish; Castilian	http://journals.fcla.edu/ijp/index; http://journals.fcla.edu/ijp/pages/view/reviewers	Blind peer review	https://journal.sipsych.org/index.php/IJP/about/editorialPolicies#peerReviewProcess	https://journal.sipsych.org/index.php/IJP/about/editorialPolicies#focusAndScope	https://journal.sipsych.org/index.php/IJP/about/submissions#authorGuidelines			24	https://journal.sipsych.org/index.php/IJP/about/editorialPolicies#openAccessPolicy			CC BY		https://journal.sipsych.org/index.php/IJP/about/submissions#copyrightNotice	Yes		False
Revista Internacional de Sociología	http://revintsociologia.revistas.csic.es		0034-9712	1988-429X	Consejo Superior de Investigaciones Científicas		OJS	Spain	No	http://revintsociologia.revistas.csic.es/index.php/revintsociologia/about/editorialPolicies				http://revintsociologia.revistas.csic.es/index.php/revintsociologia/about/editorialPolicies												DOI			2003	PDF	social politics, economics, social anthropology, political sciences, social philosophy	English, Spanish; Castilian	http://revintsociologia.revistas.csic.es/index.php/revintsociologia/about/editorialTeam	Blind peer review	http://revintsociologia.revistas.csic.es/index.php/revintsociologia/about/editorialPolicies#peerReviewProcess	http://revintsociologia.revistas.csic.es/index.php/revintsociologia/about/editorialPolicies#focusAndScope	http://revintsociologia.revistas.csic.es/index.php/revintsociologia/about/submissions#authorGuidelines			53	http://revintsociologia.revistas.csic.es/index.php/revintsociologia/about/editorialPolicies#openAccessPolicy			CC BY-NC		http://revintsociologia.revistas.csic.es/index.php/revintsociologia/index	Yes		False
Revue de Géographie Alpine	http://rga.revues.org/	Journal of Alpine Research	0035-1121	1760-7426	Institut de Géographie Alpine		revues.org	France	No	http://rga.revues.org/?page=informations				http://rga.revues.org/?page=informations											Yes				2007	PDF, HTML	geography	English, French	http://rga.revues.org/755	Double blind peer review	http://rga.revues.org/?page=informations	http://rga.revues.org/759#tocto1n1	http://rga.revues.org/757			40	http://rga.revues.org/?page=informations	Yes	http://rga.revues.org/2561	CC BY-NC-ND		http://rga.revues.org/?page=informations	Yes		False
Rivista di Estetica	http://estetica.revues.org/		0035-6212	2421-5864	Rosenberg & Sellier		revues.org	Italy	No	http://estetica.revues.org/?page=informations				http://estetica.revues.org/?page=informations											Yes	DOI, Handles	Yes	https://logs.openedition.org/awstats.pl?config=estetica	2014	HTML	Arts & Humanities, Philosophy	English, French, Italian	http://estetica.revues.org/356	Double blind peer review	http://estetica.revues.org/?page=informations	http://estetica.revues.org/361	http://estetica.revues.org/359			30	http://estetica.revues.org/?page=informations	Yes	http://estetica.revues.org/372	CC BY-NC-ND		http://estetica.revues.org/?page=informations	Yes		False
Rivista Italiana di Ornitologia - Research in Ornithology	http://sisn.pagepress.org/index.php/rio/index	RIO	0035-6875	2385-0833	PAGEPress Publications	Società Italiana di Scienze Naturali and Museo Civico di Storia Naturale di Milano, Italy	OJS	Italy	No	http://sisn.pagepress.org/index.php/rio/pages/view/payments				http://sisn.pagepress.org/index.php/rio/pages/view/payments					Yes	http://www.pagepress.org/publications/authors_fee.html	Portico			http://www.pagepress.org/publishing-services/digital-preservation.html	Yes	DOI	Yes	http://sisn.pagepress.org/index.php/rio/pages/view/stats	2010	PDF, XML	ornithology, taxonomy, natural sciences	English, Italian	http://sisn.pagepress.org/index.php/rio/pages/view/board	Blind peer review	http://sisn.pagepress.org/index.php/rio/about/editorialPolicies#peerReviewProcess	http://sisn.pagepress.org/index.php/rio/about/editorialPolicies#focusAndScope	http://sisn.pagepress.org/index.php/rio/about/submissions#authorGuidelines	Yes	http://sisn.pagepress.org/index.php/rio/pages/view/plagiarism	12	http://www.pagepress.org/open-access.html		http://www.pagepress.org/open-access.html	CC BY-NC		http://www.pagepress.org/open-access.html	Yes	Sherpa/Romeo	True
Rivista Italiana di Paleontologia e Stratigrafia	http://riviste.unimi.it/index.php/RIPS/index		0035-6883	2039-4942	Università degli Studi di Milano		OJS	Italy	No	http://riviste.unimi.it/index.php/RIPS/about/editorialPolicies#focusAndScope				http://riviste.unimi.it/index.php/RIPS/about/editorialPolicies#focusAndScope								Biblioteca Nazionale Centrale di Firenze		http://nbn.depositolegale.it/urn%3Anbn%3Ait%3Aunimi-15255	Yes	DOI			2016	PDF	paleontology, stratigraphy, geology	English	http://riviste.unimi.it/index.php/RIPS/index	Peer review	http://riviste.unimi.it/index.php/RIPS/about/editorialPolicies#peerReviewProcess	http://riviste.unimi.it/index.php/RIPS/about/editorialPolicies#focusAndScope	http://riviste.unimi.it/index.php/RIPS/about/submissions#authorGuidelines			16	http://riviste.unimi.it/index.php/RIPS/about/editorialPolicies#openAccessPolicy	Yes	http://riviste.unimi.it/index.php/RIPS/rt/metadata/6518/0	CC BY-NC-ND		http://riviste.unimi.it/index.php/RIPS/about/editorialPolicies#openAccessPolicy	Yes	Sherpa/Romeo	True
Roczniki Panstwowego Zakladu Higieny	http://wydawnictwa.pzh.gov.pl/roczniki_pzh/en	Annals of the National Institute of Hygiene	0035-7715	2451-2311	National Institute of Public Health - National Institute of Hygiene	National Institute of Public Health - National Institute of Hygiene		Poland	Yes	http://wydawnictwa.pzh.gov.pl/roczniki_pzh/for-authors	150	EUR - Euro		http://wydawnictwa.pzh.gov.pl/roczniki_pzh/for-authors													Yes		1995	PDF	nutrition, public health, food safety, general medicine, health sciences, environmental hygiene	English	http://wydawnictwa.pzh.gov.pl/roczniki_pzh/editorial-staff	Double blind peer review	http://wydawnictwa.pzh.gov.pl/roczniki_pzh/for-reviewers	http://wydawnictwa.pzh.gov.pl/roczniki_pzh/en	http://wydawnictwa.pzh.gov.pl/roczniki_pzh/for-authors			16	http://wydawnictwa.pzh.gov.pl/roczniki_pzh/en	Yes	http://wydawnictwa.pzh.gov.pl/roczniki_pzh/download-article?id=1216	CC BY-NC		http://wydawnictwa.pzh.gov.pl/roczniki_pzh/en	Yes		False
The Journal of the Rutgers University Library	http://jrul.libraries.rutgers.edu/index.php/jrul/index		0036-0473	2331-3781	Rutgers University Libraries		Rutgers University	United States	No	http://jrul.libraries.rutgers.edu/index.php/jrul/about/submissions#onlineSubmissions				http://jrul.libraries.rutgers.edu/index.php/jrul/about/submissions#onlineSubmissions										https://rucore.libraries.rutgers.edu	Yes	DOI			2005	PDF	New Jersey history, History of libraries, History of books	English	http://jrul.libraries.rutgers.edu/index.php/jrul/about/editorialTeam	Editorial review	http://jrul.libraries.rutgers.edu/index.php/jrul/about/editorialPolicies#custom-0	http://jrul.libraries.rutgers.edu/index.php/jrul/about/editorialPolicies#focusAndScope	http://jrul.libraries.rutgers.edu/index.php/jrul/about/submissions#authorGuidelines			20	http://jrul.libraries.rutgers.edu/index.php/jrul/about/editorialPolicies#openAccessPolicy	Yes	http://jrul.libraries.rutgers.edu/index.php/jrul/about/submissions#copyrightNotice	CC BY-NC		http://jrul.libraries.rutgers.edu/index.php/jrul/about/submissions#privacyStatement	Yes	Sherpa/Romeo	True
Salud Pública de México	http://saludpublica.mx		0036-3634		Instituto Nacional de Salud Pública	Instituto Nacional de Salud Pública	OJS	Mexico	No	http://saludpublica.mx/index.php/spm/about/editorialPolicies#custom-0				http://saludpublica.mx/index.php/spm/about/editorialPolicies#custom-0							CLOCKSS			http://saludpublica.mx/index.php/spm/about/editorialPolicies#custom-1	Yes	DOI			1997	PDF, HTML	health sciences, epidemiology, nutrition, public health, health systems, environmental health	English, Spanish; Castilian	http://saludpublica.mx/index.php/spm/about/editorialTeam	Double blind peer review	http://saludpublica.mx/index.php/spm/about/editorialPolicies#peerReviewProcess	http://saludpublica.mx/index.php/spm/about/editorialPolicies#focusAndScope	http://saludpublica.mx/index.php/spm/about/submissions#authorGuidelines			34	http://saludpublica.mx/index.php/spm/about/editorialPolicies#custom-2			CC BY-NC-SA		http://saludpublica.mx/index.php/spm/about/editorialPolicies#custom-2	Yes		False
Revista do Instituto de Medicina Tropical de São Paulo	http://www.scielo.br/rimtsp		0036-4665	1678-9946	Universidade de São Paulo	Instituto de Medicina Tropical	SciELO Brazil	Brazil	Yes	http://www.scielo.br/revistas/rimtsp/iinstruc.htm	400	USD - US Dollar		http://www.scielo.br/revistas/rimtsp/iinstruc.htm										http://www.scielo.br/revistas/rimtsp/iinstruc.htm	Yes		Yes	http://www.scielo.br/scielo.php?script=sci_arttext&pid=S0036-46652015000200111&lng=en&nrm=iso&tlng=en	1987	PDF, HTML, XML	biological sciences, health sciences	English, Portuguese	http://www.scielo.br/revistas/rimtsp/iedboard.htm	Peer review	http://www.scielo.br/revistas/rimtsp/iinstruc.htm#Scope	http://www.scielo.br/revistas/rimtsp/iinstruc.htm	http://www.scielo.br/revistas/rimtsp/iinstruc.htm			8	http://www.scielo.br/revistas/rimtsp/isubscrp.htm	Yes	http://www.scielo.br/scielo.php?script=sci_arttext&pid=S0036-46652015000200111&lng=en&nrm=iso&tlng=en	CC BY-NC		http://www.scielo.br/revistas/rimtsp/iaboutj.htm	Yes		False
Scientia Pharmaceutica	http://www.mdpi.com/journal/scipharm		0036-8709	2218-0532	Österreichische Apotheker-Verlagsgesellschaft m. b. H.		MDPI AG	Austria	Yes	http://www.mdpi.com/journal/scipharm/apc	600	CHF - Swiss Franc		http://www.mdpi.com/journal/scipharm/apc								Swiss National Library		https://thekeepers.org/journals?query=0036-8709	Yes	DOI	Yes	http://www.mdpi.com/2218-0532/85/1/8	2006	PDF, XML	pharmacy, chemistry, pharmacology, medicine, pharmaceutical technology	English	http://www.mdpi.com/journal/scipharm/editors	Blind peer review	http://www.mdpi.com/journal/scipharm/instructions#editorial_procedure	http://www.mdpi.com/journal/scipharm/about	http://www.mdpi.com/journal/scipharm/instructions	Yes	http://www.mdpi.com/journal/scipharm/about	10	http://www.mdpi.com/journal/scipharm	Yes	http://www.mdpi.com/2218-0532/85/1/8	CC BY		http://www.mdpi.com/about/openaccess	Yes	Sherpa/Romeo	True
Sefarad : Revista de Estudios Hebraicos y Sefardíes	http://sefarad.revistas.csic.es		0037-0894	1988-320X	Consejo Superior de Investigaciones Científicas		OJS	Spain	No	http://sefarad.revistas.csic.es/index.php/sefarad/about/editorialPolicies#openAccessPolicy				http://sefarad.revistas.csic.es/index.php/sefarad/about/editorialPolicies												DOI			2001	PDF	jews in Spain, Sephardim, Judaism, cultural studies, philology, Hebrew	English, Portuguese, Spanish; Castilian	http://sefarad.revistas.csic.es/index.php/sefarad/about/editorialTeam	Double blind peer review	http://sefarad.revistas.csic.es/index.php/sefarad/about/editorialPolicies#peerReviewProcess	http://sefarad.revistas.csic.es/index.php/sefarad/about/editorialPolicies#focusAndScope	http://sefarad.revistas.csic.es/index.php/sefarad/about/submissions#authorGuidelines			48	http://sefarad.revistas.csic.es/index.php/sefarad/about/editorialPolicies#openAccessPolicy			CC BY-NC		http://sefarad.revistas.csic.es/index.php/sefarad/index	Yes		False
Služba Božja	http://hrcak.srce.hr/sluzba-bozja?lang=en		0037-7074	1849-1057	Catholic faculty of theology Split		Hrcak	Croatia	No	http://hrcak.srce.hr/sluzba-bozja?lang=en				http://hrcak.srce.hr/sluzba-bozja?lang=en													Yes	http://hrcak.srce.hr/index.php?show=clanak&id_clanak_jezik=228964	2000	PDF	liturgy, pastoral theology, ecumenical theology, canon law, moral theology, catechetics	Croatian, English, German, Italian	http://hrcak.srce.hr/sluzba-bozja?lang=en	Double blind peer review	http://hrcak.srce.hr/sluzba-bozja?lang=en	http://hrcak.srce.hr/sluzba-bozja?lang=en	http://hrcak.srce.hr/sluzba-bozja?lang=en			24	http://hrcak.srce.hr/sluzba-bozja?lang=en			CC BY		http://hrcak.srce.hr/sluzba-bozja?lang=en	Yes		False
Social Work/Maatskaplike Werk	http://socialwork.journals.ac.za/pub/index		0037-8054	2312-7198	Stellenbosch University		OJS	South Africa	Yes	http://socialwork.journals.ac.za/pub/about/editorialPolicies#custom-3	3000	ZAR - Rand		http://socialwork.journals.ac.za/pub/about/editorialPolicies#custom-3							CLOCKSS, Portico			http://socialwork.journals.ac.za/pub/about/editorialPolicies#custom-4	Yes	DOI			2014	PDF	welfare organizations, social work, social welfare, family and child care, community work, welfare policy	Afrikaans, English	http://socialwork.journals.ac.za/pub/about/editorialTeam	Double blind peer review	http://socialwork.journals.ac.za/pub/about/editorialPolicies#peerReviewProcess	http://socialwork.journals.ac.za/pub/about/editorialPolicies#focusAndScope	http://socialwork.journals.ac.za/pub/about/submissions#authorGuidelines			6	http://socialwork.journals.ac.za/pub/about/editorialPolicies#openAccessPolicy			CC BY-SA		http://socialwork.journals.ac.za/pub/about/submissions#copyrightNotice	Yes		False
Revista da Sociedade Brasileira de Medicina Tropical	http://www.scielo.br/scielo.php/script_sci_serial/pid_0037-8682/lng_pt/nrm_iso	Jornal Brasileiro de Medicina Tropical	0037-8682	1678-9849	Sociedade Brasileira de Medicina Tropical (SBMT)		SciELO Brazil	Brazil	No	http://www.scielo.br/revistas/rsbmt/iinstruc.htm#002				http://www.scielo.br/revistas/rsbmt/iinstruc.htm#002										http://www.scielo.br/revistas/rsbmt/iinstruc.htm	Yes	DOI	Yes		1997	PDF, HTML, XML	health sciences	English, Portuguese, Spanish; Castilian	http://www.scielo.br/revistas/rsbmt/iedboard.htm	Peer review	http://www.scielo.br/revistas/rsbmt/iinstruc.htm	http://www.scielo.br/revistas/rsbmt/iinstruc.htm	http://www.scielo.br/revistas/rsbmt/iinstruc.htm			8	http://www.scielo.br/revistas/rsbmt/iinstruc.htm	Yes	http://www.scielo.br/scielo.php?script=sci_arttext&pid=S0037-86822015000300258&lng=en&nrm=iso&tlng=en	CC BY		http://www.scielo.br/scielo.php/script_sci_serial/pid_0037-8682/lng_pt/nrm_iso	Yes		False
Boletim da Sociedade Paranaense de Matemática	http://www.periodicos.uem.br/ojs/index.php/BSocParanMat/index		0037-8712	2175-1188	Sociedade Brasileira de Matemática		OJS	Brazil	No	http://www.periodicos.uem.br/ojs/index.php/BSocParanMat/about/submissions#onlineSubmissions				http://www.periodicos.uem.br/ojs/index.php/BSocParanMat/about/submissions#onlineSubmissions											Yes	DOI			2002	PDF	pure mathematics, applied mathematics	English, Portuguese	http://www.periodicos.uem.br/ojs/index.php/BSocParanMat/about/editorialTeam	Double blind peer review	http://www.periodicos.uem.br/ojs/index.php/BSocParanMat/about/editorialPolicies#peerReviewProcess	http://www.periodicos.uem.br/ojs/index.php/BSocParanMat/about/editorialPolicies#focusAndScope	http://www.periodicos.uem.br/ojs/index.php/BSocParanMat/about/submissions#authorGuidelines			25	http://www.periodicos.uem.br/ojs/index.php/BSocParanMat/about/editorialPolicies#openAccessPolicy			CC BY		http://www.periodicos.uem.br/ojs/index.php/BSocParanMat/about/editorialPolicies#sectionPolicies	Yes	Diadorim	False
South African Journal of Obstetrics and Gynaecology	http://www.sajog.org.za	SAJOG	0038-2329	2305-8862	Health and Medical Publishing Group		OJS	South Africa	No	http://www.sajog.org.za/index.php/SAJOG/about/editorialPolicies#custom-3				http://www.sajog.org.za/index.php/SAJOG/about/editorialPolicies#custom-3											Yes	DOI	Yes	http://www.sajog.org.za/index.php/SAJOG/article/view/906	2006	PDF	Gynaecology, Maternal Health, obstetrics	English	http://www.sajog.org.za/index.php/SAJOG/about/editorialTeam	Blind peer review	http://www.sajog.org.za/index.php/SAJOG/about/editorialPolicies#peerReviewProcess	http://www.sajog.org.za/index.php/SAJOG/about/editorialPolicies#focusAndScope	http://www.sajog.org.za/index.php/SAJOG/about/submissions#authorGuidelines	Yes	http://www.sajog.org.za/index.php/SAJOG/about/editorialPolicies#custom-2	15	http://sajog.org.za/index.php/SAJOG/about/editorialPolicies#openAccessPolicy	Yes	http://www.sajog.org.za/index.php/SAJOG/article/view/1050/496	CC BY-NC		http://sajog.org.za/index.php/SAJOG/about/editorialPolicies#custom-4	Yes		False
South African Journal of Science	http://www.sajs.co.za		0038-2353	1996-7489	Academy of Science of South Africa		OJS	South Africa	No	http://sajs.co.za/guidelines-authors#fees				http://sajs.co.za/guidelines-authors#fees							Portico			http://www.sajs.co.za/digital-archiving-and-preservation-policy	Yes	DOI	Yes	http://sajs.co.za/osteogenic-tumour-australopithecus-sediba-earliest-hominin-evidence-neoplastic-disease/patrick-s-randolph-quinney-scott-williams-maryna-steyn-marc-r-meyer-jacqueline-s-smilg-steven-e	2009	PDF, ePUB, XML	life sciences, social sciences, physical sciences, technology	English	http://www.sajs.co.za/about/editorial-team	Double blind peer review	http://www.sajs.co.za/peer-review-process	http://www.sajs.co.za/about/focus-and-scope	http://www.sajs.co.za/guidelines-authors	Yes	http://www.sajs.co.za/plagiarism-policy	52	http://www.sajs.co.za/open-access-and-copyright	Yes	http://www.sajs.co.za/qualification-coal-degradation-aid-micro-focus-computed-tomography/jacob-viljoen-quentin-p-campbell-marco-le-roux-jakobus-hoffman	CC BY		http://www.sajs.co.za/open-access-and-copyright	Yes	Sherpa/Romeo	True
Stanovništvo	http://www.doiserbia.nb.rs/journal.aspx?issn=0038-982X		0038-982X	2217-3986	Institute of Social Science, Belgrade		doiSerbia	Serbia	No	http://doiserbia.nb.rs/journal.aspx?issn=0038-982X&pg=editorialpolicy#Open access policy				http://doiserbia.nb.rs/journal.aspx?issn=0038-982X&pg=editorialpolicy#Open access policy									National Library of Serbia	http://www.doiserbia.nb.rs/journal.aspx?issn=0038-982X	Yes	DOI			2002	PDF	demographic research	English, Serbian	http://www.doiserbia.nb.rs/journal.aspx?issn=0038-982X	Peer review	http://doiserbia.nb.rs/journal.aspx?issn=0038-982X&pg=editorialpolicy#Peer review	http://doiserbia.nb.rs/journal.aspx?issn=0038-982X&pg=editorialpolicy#Editorial policy	http://doiserbia.nb.rs/journal.aspx?issn=0038-982X&pg=instructionsforauthors			15	http://doiserbia.nb.rs/journal.aspx?issn=0038-982X&pg=editorialpolicy#Open access policy			CC BY-NC-ND		http://doiserbia.nb.rs/journal.aspx?issn=0038-982X&pg=editorialpolicy#Open access policy	Yes		False
Stomatološki glasnik Srbije	https://scindeks.ceon.rs/journaldetails.aspx?issn=0039-1743		0039-1743	1452-3701	Serbian Medical Society - Dental Section, Belgrade		SCIndeks: Serbian Citation Index	Serbia	No	https://scindeks.ceon.rs/PublicationPolicy.aspx?issn=0039-1743&amp;lang=en#ppAC				https://scindeks.ceon.rs/PublicationPolicy.aspx?issn=0039-1743&amp;lang=en#ppAC								National Library of Serbia		https://scindeks.ceon.rs/journaldetails.aspx?issn=0039-1743	Yes	DOI	Yes	https://scindeks.ceon.rs/article.aspx?query=ISSID%26and%2613523&page=1&sort=8&stype=0&backurl=%2fissue.aspx%3fissue%3d13523	2013	PDF	dentistry, endodontics, prosthodontics, orthodontics, oral surgery	English, Serbian	https://scindeks.ceon.rs/EditorialBoard.aspx?issn=0039-1743&amp;lang=en	Double blind peer review	https://scindeks.ceon.rs/PublicationPolicy.aspx?issn=0039-1743&amp;lang=en#ppRT	https://scindeks.ceon.rs/Portrait.aspx?issn=0039-1743	https://scindeks-clanci.ceon.rs/data/uputstva/0039-1743ue.pdf			12	https://scindeks.ceon.rs/PublicationPolicy.aspx?issn=0039-1743&amp;lang=en#ppOA			CC BY-SA		https://scindeks.ceon.rs/PublicationPolicy.aspx?issn=0039-1743&amp;lang=en#ppLC	Yes		True
Studia Psychologica	http://www.studiapsychologica.com/		0039-3320	2585-8815	Slovak Academy of Sciences, Centre of Social and Psychological Sciences	Institute of Experimental Psychology		Slovakia	No	http://www.studiapsychologica.com/				http://www.studiapsychologica.com/											Yes				2016	PDF	cognition, emotions, personality, social psychology	English	http://www.studiapsychologica.com/	Double blind peer review	http://www.studiapsychologica.com/	http://www.studiapsychologica.com/	http://www.studiapsychologica.com/			43	http://www.studiapsychologica.com/			CC BY		http://www.studiapsychologica.com/	Yes		True
Studii si Cercetari de Istoria Artei : Teatru, Muzica, Cinematografie	http://www.scia.istoria-artei.ro/		0039-3991	2067-5119	Publishing House of the Romanian Academy	G. Oprescu Institute of Art History		Romania	No	http://www.scia.istoria-artei.ro/submissions.php				http://www.scia.istoria-artei.ro/submissions.php											Yes				2007	PDF	theatre history, music history, film history	English, French, German, Romanian; Moldavian; Moldovan	http://www.scia.istoria-artei.ro/editorial-team.php	Blind peer review	http://www.scia.istoria-artei.ro/submissions.php	http://www.scia.istoria-artei.ro/about-the-journal.php	http://www.scia.istoria-artei.ro/guidelines-for-authors.php			40	http://www.scia.istoria-artei.ro/			Publisher's own license	Attribution, No Commercial Usage, No Derivatives	http://www.scia.istoria-artei.ro/copyright-and-permissions-info.php	Yes		False
Taal en Tongval: Language Variation in the Low Countries	http://www.taalentongval.eu/		0039-8691	2215-1214	Amsterdam University Press		IngentaConnect	Netherlands	Yes	http://en.aup.nl/en/journals/taal-en-tongval-language-variation-in-the-low-countries.html	200	EUR - Euro		http://en.aup.nl/en/journals/taal-en-tongval-language-variation-in-the-low-countries.html					Yes	http://en.aup.nl/en/journals/taal-en-tongval-language-variation-in-the-low-countries.html					Yes	DOI			2009	PDF, HTML	linguistics, language variation, Dutch, Flemish, low countries	Dutch; Flemish, English, German	http://en.aup.nl/en/journals/taal-en-tongval-language-variation-in-the-low-countries.html	Double blind peer review	http://en.aup.nl/en/journals/taal-en-tongval-language-variation-in-the-low-countries.html	http://en.aup.nl/en/journals/taal-en-tongval-language-variation-in-the-low-countries.html	http://en.aup.nl/wosmedia/1262/instructions_for_authors_journal_articles.pdf			53	http://www.taalentongval.eu/			CC BY-NC-ND		http://www.taalentongval.eu/	Yes		False
Tehnika	http://scindeks.ceon.rs/journalDetails.aspx?issn=0040-2176&lang=en		0040-2176	2560-3086	Savez inženjera i tehnicara Srbije	string	SCIndeks: Serbian Citation Index	Serbia	No	http://scindeks.ceon.rs/PublicationPolicy.aspx?issn=0040-2176&lang=en#ppAC				http://scindeks.ceon.rs/PublicationPolicy.aspx?issn=0040-2176&lang=en#ppAC								National Library of Serbia		http://scindeks.ceon.rs/PublicationPolicy.aspx?issn=0040-2176	Yes	DOI			2014	PDF	geology, mining, electrical engineering, mechanical engineering, civil engineering, new materials	English, Serbian	http://scindeks.ceon.rs/EditorialBoard.aspx?issn=0040-2176&lang=en	Blind peer review	http://scindeks.ceon.rs/PublicationPolicy.aspx?issn=0040-2176&lang=en#ppRT	http://scindeks.ceon.rs/Portrait.aspx?issn=0040-2176	http://scindeks-clanci.ceon.rs/data/uputstva/0040-2176us.pdf		http://scindeks.ceon.rs/PublicationPolicy.aspx?issn=0040-2176&lang=en#ppSP	4	http://scindeks.ceon.rs/PublicationPolicy.aspx?issn=0040-2176&lang=en#ppOA	Yes	http://scindeks.ceon.rs/article.aspx?artid=0040-21761601016M	CC BY		http://scindeks.ceon.rs/PublicationPolicy.aspx?issn=0040-2176&lang=en#ppLC	Yes		True
Tidsskrift for Samfunnsforskning	http://www.idunn.no/tfs	Norwegian Journal of Social Research	0040-716X	1504-291X	Scandinavian University Press/Universitetsforlaget	Institutt for Samfunnsforskning	Idunn	Norway	No	https://www.idunn.no/tfs#about				https://www.idunn.no/tfs#about											Yes	DOI			2017	PDF, HTML, XML	political science, sociology, social anthropology, economy, history, media	Bokmål, Norwegian; Norwegian Bokmål	https://www.idunn.no/tfs#editors	Double blind peer review	https://www.idunn.no/tfs#about	https://www.idunn.no/tfs#about	https://www.idunn.no/tfs#authors			52	https://www.idunn.no/tfs#rights	Yes	https://www.idunn.no/tfs/2017/02/hoeyreklikk_en_analyse_av_ytre_hoeyre_paa_sosiale_medier_i_no	CC BY-NC		https://www.idunn.no/tfs#rights	Yes	Sherpa/Romeo	True
El Trimestre Económico	http://www.eltrimestreeconomico.com.mx/index.php/te/index		0041-3011	2448-718X	Fondo de Cultura Económica	Fondo de Cultura Económica	Redalyc	Mexico	No	http://www.eltrimestreeconomico.com.mx/index.php/te/index				http://www.eltrimestreeconomico.com.mx/index.php/te/index										http://www.eltrimestreeconomico.com.mx/index.php/te/about/editorialPolicies#custom-6		DOI			2011	PDF	latin america, development, economics	Spanish; Castilian	http://www.eltrimestreeconomico.com.mx/index.php/te/about/displayMembership/4	Peer review	http://www.eltrimestreeconomico.com.mx/index.php/te/about/editorialPolicies#peerReviewProcess	http://www.eltrimestreeconomico.com.mx/index.php/te/about/editorialPolicies#focusAndScope	http://www.eltrimestreeconomico.com.mx/index.php/te/about/submissions#onlineSubmissions	Yes	http://www.eltrimestreeconomico.com.mx/index.php/te/about/editorialPolicies#custom-6	40	http://www.eltrimestreeconomico.com.mx/index.php/te/about/editorialPolicies#openAccessPolicy			CC BY-NC-ND		http://www.eltrimestreeconomico.com.mx/index.php/te/about/submissions#copyrightNotice	Yes		False
Tydskrif vir Letterkunde	http://journals.assaf.org.za/index.php/tvl	Journal for Literature	0041-476X	2309-9070	Tydskrif vir Letterkunde Association	University of Pretoria	OJS	South Africa	Yes	http://journals.assaf.org.za/index.php/tvl/about/editorialPolicies#custom-5	6000	ZAR - Rand		http://journals.assaf.org.za/index.php/tvl/about/editorialPolicies#custom-5					Yes	http://journals.assaf.org.za/index.php/tvl/about/editorialPolicies#custom-5	LOCKSS, CLOCKSS, Portico			http://journals.assaf.org.za/index.php/tvl/about/editorialPolicies#custom-3	Yes	DOI	Yes	http://journals.assaf.org.za/index.php/tvl/about/editorialPolicies#custom-4	2015	PDF	African literature, cultural practices, Francophone literature	Afrikaans, Dutch; Flemish, English, French	http://journals.assaf.org.za/index.php/tvl/about/editorialTeam	Double blind peer review	http://journals.assaf.org.za/index.php/tvl/about/editorialPolicies#peerReviewProcess	http://journals.assaf.org.za/index.php/tvl/about/editorialPolicies#focusAndScope	http://journals.assaf.org.za/index.php/tvl/about/submissions#authorGuidelines	Yes	http://journals.assaf.org.za/index.php/tvl/about/editorialPolicies#custom-0	16	http://journals.assaf.org.za/index.php/tvl/about/editorialPolicies#openAccessPolicy	Yes	http://journals.assaf.org.za/tvl/article/view/1173/1028	CC BY-SA		http://journals.assaf.org.za/index.php/tvl/about/editorialPolicies#custom-2	Yes		False
Tecnología Química	http://revistas.uo.edu.cu/index.php/tq		0041-8420	2224-6185	Universidad de Oriente	Universidad de Oriente	OJS	Cuba	No	http://revistas.uo.edu.cu/index.php/tq/about/editorialPolicies#custom-0				http://revistas.uo.edu.cu/index.php/tq/about/editorialPolicies#custom-0							CLOCKSS			https://thekeepers.org/journals?query=0041-8420					2008	PDF	chemistry industry, chemistry of materials	Spanish; Castilian	http://revistas.uo.edu.cu/index.php/tq/about/editorialTeam	Double blind peer review	http://revistas.uo.edu.cu/index.php/tq/about/editorialPolicies#peerReviewProcess	http://revistas.uo.edu.cu/index.php/tq/about/editorialPolicies#focusAndScope	http://revistas.uo.edu.cu/index.php/tq/about/submissions#authorGuidelines			12	http://revistas.uo.edu.cu/index.php/tq/about/editorialPolicies#openAccessPolicy			CC BY-NC		http://revistas.uo.edu.cu/index.php/tq/about/editorialPolicies#openAccessPolicy	Yes		False
Revista do Hospital das Clínicas	http://www.scielo.br/rhc		0041-8781	1678-9903	Universidade de São Paulo - FM/USP		SciELO Brazil		No Information																				1999		health sciences
Revista de Ciências Sociais	http://www.rcs.ufc.br		0041-8862	2318-4620	Universidade Federal do Ceará	Universidade Federal do Ceará, Departamento de Ciências Sociais	OJS	Brazil	No	http://www.periodicos.ufc.br/revcienso/about/editorialPolicies#openAccessPolicy				http://www.periodicos.ufc.br/revcienso/about/editorialPolicies#openAccessPolicy											Yes				2005	PDF	social science, anthropology, sociology, political science	Portuguese	http://www.periodicos.ufc.br/revcienso/about/editorialTeam	Double blind peer review	http://www.periodicos.ufc.br/revcienso/about/editorialPolicies#peerReviewProcess	http://www.periodicos.ufc.br/revcienso/about/editorialPolicies#focusAndScope	http://www.periodicos.ufc.br/revcienso/about/submissions#authorGuidelines			50	http://www.periodicos.ufc.br/revcienso/about/editorialPolicies#openAccessPolicy			CC BY		http://www.periodicos.ufc.br/revcienso/about/submissions#copyrightNotice	Yes	Diadorim	True
Veritas	http://revistaseletronicas.pucrs.br/ojs/index.php/veritas	Verita: Revista trimestral de filosofia da PUCRS	0042-3955	1984-6746	Editora da Pontifícia Universidade Católica do Rio Grande do Sul (EDIPUCRS)	Pontifícia Universidade Católica do Rio Grande do Sul	OJS	Brazil	No	http://revistaseletronicas.pucrs.br/ojs/index.php/veritas/about/editorialPolicies#custom-7				http://revistaseletronicas.pucrs.br/ojs/index.php/veritas/about/editorialPolicies#custom-7								Biblioteca Nacional do Brasil		http://revistaseletronicas.pucrs.br/ojs/index.php/veritas/about/editorialPolicies#archiving	Yes	DOI			2005	PDF	religion	English, French, German, Italian, Latin, Portuguese, Spanish; Castilian	http://revistaseletronicas.pucrs.br/ojs/index.php/veritas/about/editorialPolicies#custom-1	Double blind peer review	http://revistaseletronicas.pucrs.br/ojs/index.php/veritas/about/editorialPolicies#peerReviewProcess	http://revistaseletronicas.pucrs.br/ojs/index.php/veritas/about/editorialPolicies#focusAndScope	http://revistaseletronicas.pucrs.br/ojs/index.php/veritas/about/submissions#authorGuidelines			10	http://revistaseletronicas.pucrs.br/ojs/index.php/veritas/about/editorialPolicies#openAccessPolicy	Yes	http://revistaseletronicas.pucrs.br/ojs/index.php/veritas/article/view/15317/11345	CC BY		http://revistaseletronicas.pucrs.br/ojs/index.php/veritas/index	Yes	Sherpa/Romeo, Diadorim	True
Vestnik Dermatologii i Venerologii	http://www.vestnikdv.ru		0042-4609	2313-6294	State Scientific Center of Dermatovenereology and Cosmetology	Russian Society of Dermatovenereology and Cosmetology	Elpub.ru	Russian Federation	No	http://www.vestnikdv.ru/jour/about/editorialPolicies#custom-4				http://www.vestnikdv.ru/jour/about/editorialPolicies#custom-4									elibrary.ru	https://elibrary.ru/title_about.asp?id=7685	Yes	DOI			2014	PDF	cosmetology, dermatology, sexually-transmitted infections	Russian	http://www.vestnikdv.ru/index.php/jour/pages/view/EditorialS	Peer review	http://www.vestnikdv.ru/jour/about/editorialPolicies#custom-0	http://www.vestnikdv.ru/jour/about/editorialPolicies#focusAndScope	http://www.vestnikdv.ru/jour/about/submissions	Yes	http://www.vestnikdv.ru/jour/about/editorialPolicies#custom-6	8	http://www.vestnikdv.ru/jour/about/editorialPolicies#openAccessPolicy			CC BY		http://www.vestnikdv.ru/jour/about/submissions#copyrightNotice	Yes		True
Journal of Hydrology and Hydromechanics	http://www.degruyter.com/view/j/johh	Vodohospodársky Casopis	0042-790X		Sciendo	The Institute of Hydrology of the Slovak Academy of Sciences, Bratislava, Slovakia and the Institute of Hydrodynamics of the Academy of Sciences of the Czech Republic, v. v. i., Prague, Czech Republic	Sciendo	Poland	No	http://www.degruyter.com/view/supplement/s0042790X_Instructions_for_Authors.pdf				http://www.degruyter.com/view/supplement/s0042790X_Instructions_for_Authors.pdf							Portico			http://www.degruyter.com/page/860	Yes	DOI			2009	PDF	Biohydrology, Catchment hydrology, Vadose zone hydrology, hydromechanics	English	http://www.degruyter.com/view/j/johh	Blind peer review	http://www.degruyter.com/view/j/johh	http://www.degruyter.com/view/j/johh	http://www.degruyter.com/view/j/johh	Yes	http://degruyteropen.com/versita-takes-a-further-step-to-ward-off-plagiarism/	8	http://degruyteropen.com/you/journal-author/open-access-statement/	Yes	http://www.degruyter.com/view/j/johh.2015.63.issue-1/johh-2015-0005/johh-2015-0005.xml?format=INT	CC BY-NC-ND		http://degruyteropen.com/you/journal-author/copyright-and-license-statement/	Yes	Sherpa/Romeo	False
Vojnosanitetski Pregled	http://www.doiserbia.nb.rs/journal.aspx?issn=0042-8450		0042-8450	2406-0720	Military Health Department, Ministry of Defance, Serbia		doiSerbia	Serbia	Yes	http://doiserbia.nb.rs/journal.aspx?issn=0042-8450&pg=editorialpolicy#Open access policy	150	EUR - Euro		http://doiserbia.nb.rs/journal.aspx?issn=0042-8450&pg=editorialpolicy#Open access policy								National Library of Serbia		http://www.doiserbia.nb.rs/journal.aspx?issn=0042-8450	Yes	DOI			2002	PDF	medical sciences	English, Serbian	http://www.doiserbia.nb.rs/journal.aspx?issn=0042-8450	Double blind peer review	http://doiserbia.nb.rs/journal.aspx?issn=0042-8450&pg=editorialpolicy#Peer review	http://doiserbia.nb.rs/journal.aspx?issn=0042-8450&pg=editorialpolicy#Editorial policy	http://doiserbia.nb.rs/journal.aspx?issn=0042-8450	Yes	http://doiserbia.nb.rs/journal.aspx?issn=0042-8450&pg=editorialpolicy#Plagiarism	16	http://doiserbia.nb.rs/journal.aspx?issn=0042-8450&pg=editorialpolicy#Open access policy			CC BY-SA		http://doiserbia.nb.rs/journal.aspx?issn=0042-8450&pg=editorialpolicy#Copyright	Yes		True
Vojnotehnicki Glasnik	http://www.vtg.mod.gov.rs/index-e.html	Military Technical Courier	0042-8469	2217-4753	University of Defence in Belgrade	Ministry of Defence of the Republic of Serbia	Military Technical Courier ONLINE	Serbia	No	http://www.vtg.mod.gov.rs/publication-ethics-statement.html				http://www.vtg.mod.gov.rs/publication-ethics-statement.html								of Serbia		http://scindeks-repozitorijum.ceon.rs/default.aspx?issn=0042-8469	Yes	DOI	Yes	http://scindeks.ceon.rs/article.aspx?query=ISSID%26and%2613261&page=3&sort=8&stype=0&backurl=%2fissue.aspx%3fissue%3d13261	2011	PDF	contemporary weapon systems, modern military technologies, military equipment	English, Russian, Serbian	http://www.vtg.mod.gov.rs/editorial-board.html	Double blind peer review	http://www.vtg.mod.gov.rs/peer-review-process.html#.V3OjSbiLTNM	http://www.vtg.mod.gov.rs/about-journal.html#.U81Mfvl_v4A	http://www.vtg.mod.gov.rs/call-for-papers.html	Yes	http://www.vtg.mod.gov.rs/index-e.html#.VL0jwUfF9pI	12	http://www.vtg.mod.gov.rs/contents-of-the-current-issue.html	Yes	http://aseestant.ceon.rs/index.php/vtg/article/view/5368	CC BY		http://aseestant.ceon.rs/index.php/vtg/issue/current	Yes	Sherpa/Romeo	True
Zapiski Historyczne	http://www.zapiskihistoryczne.pl	Historical Records	0044-1791	2449-8637	Towarzystwo Naukowe w Toruniu	Towarzystwo Naukowe w Toruniu		Poland	No	http://www.zapiskihistoryczne.pl/pl/page/test				http://www.zapiskihistoryczne.pl/pl/page/test										http://www.zapiskihistoryczne.pl/en/issues	Yes	DOI	Yes	http://www.zapiskihistoryczne.pl/en/issues/	2010	PDF	history, Baltic region, archeology	English, German, Polish	http://www.zapiskihistoryczne.pl/en/page/the-editorial-committee	Double blind peer review	http://www.zapiskihistoryczne.pl/en/page/reviews	http://www.zapiskihistoryczne.pl/en/page/editorial	http://www.zapiskihistoryczne.pl/en/page/editorial-guidelines	Yes	http://www.zapiskihistoryczne.pl/en/page/editorial-guidelines	15	http://www.zapiskihistoryczne.pl/pl/page/test			CC BY-NC		http://www.zapiskihistoryczne.pl/en/page/copyright-policy	Yes		False
Životné prostredie	http://147.213.211.222/taxonomy/term/370		0044-4863	2585-7800	Institute of Landscape Ecology of the Slovak Academy of Sciences			Slovakia	No	http://147.213.211.222/taxonomy/term/370				http://147.213.211.222/taxonomy/term/370															2014	PDF	landscape ecology, environmental sciences	Slovak	http://147.213.211.222/node/112	Peer review	http://147.213.211.222/node/4980	http://147.213.211.222/taxonomy/term/370	http://147.213.211.222/node/111			9	http://147.213.211.222/node/6106			CC BY		http://147.213.211.222/taxonomy/term/370	Yes		True
Acta Amazonica	http://www.scielo.br/scielo.php/script_sci_serial/pid_0044-5967/lng_en/nrm_iso/lng_en		0044-5967		Instituto Nacional de Pesquisas da Amazônia		SciELO Brazil	Brazil	No	http://www.scielo.br/revistas/aa/iinstruc.htm				http://www.scielo.br/revistas/aa/iinstruc.htm											Yes	DOI	Yes	http://www.scielo.br/statjournal.php?lang=en&issn=0044-5967	2003	PDF, HTML, XML	floristics, the Amazon, botany, agronomy, forest science, zoology	English, Portuguese, Spanish; Castilian	http://www.scielo.br/revistas/aa/iedboard.htm	Peer review	http://www.scielo.br/revistas/aa/iinstruc.htm	http://www.scielo.br/revistas/aa/iaboutj.htm	http://www.scielo.br/revistas/aa/iinstruc.htm			22	http://www.scielo.br/revistas/aa/isubscrp.htm			CC BY-NC		http://www.scielo.br/revistas/aa/iaboutj.htm	Yes		False
Acta Medica Iranica	http://acta.tums.ac.ir/		0044-6025	1735-9694	Tehran University of Medical Sciences		Tehran University of Medical Sciences	Iran, Islamic Republic of	No	http://acta.tums.ac.ir/index.php/acta/about/editorialPolicies#custom-0				http://acta.tums.ac.ir/index.php/acta/about/editorialPolicies#custom-0											Yes		Yes	http://acta.tums.ac.ir/index.php/acta/article/view/5964	1956	PDF, XML	medical sciences	English	http://acta.tums.ac.ir/index.php/acta/pages/view/editorial_board	Blind peer review	http://acta.tums.ac.ir/index.php/acta/about/editorialPolicies#sectionPolicies	http://acta.tums.ac.ir/index.php/acta/about/editorialPolicies#focusAndScope	http://acta.tums.ac.ir/index.php/acta/about/submissions#authorGuidelines			18	http://acta.tums.ac.ir/index.php/acta/about/editorialPolicies#openAccessPolicy	Yes	http://acta.tums.ac.ir/index.php/acta/article/view/6159/5115	CC BY-NC		http://acta.tums.ac.ir/index.php/acta/about	Yes		True
Archivum Mathematicum	http://www.emis.de/journals/AM/		0044-8753	1212-5059	Masarykova Universita		EMIS, DML-CZ	Czech Republic	No	http://www.emis.de/journals/AM/				http://www.emis.de/journals/AM/								DML-CZ (The Czech Digital Mathematics Library)	EMIS (The European Mathematical Information Service)	http://www.emis.de/journals/AM/volumes.html	Yes				1965	PDF	mathematics	English	http://www.emis.de/journals/AM/ed_board.html	Peer review	http://www.emis.de/journals/AM/	http://www.emis.de/journals/AM/	http://www.emis.de/journals/AM/submission.html			35	http://www.emis.de/journals/AM/			CC BY-NC-ND		http://www.emis.de/journals/AM/	Yes		True
Revista Ciência Agronômica	http://www.scielo.br/scielo.php?script=sci_serial&pid=1806-6690&lng=en&nrm=iso		0045-6888	1806-6690	Universidade Federal do Ceará			Brazil	Yes	http://www.scielo.br/revistas/rca/iinstruc.htm	360	BRL - Brazilian Real	Yes	http://www.scielo.br/revistas/rca/iinstruc.htm	100	BRL - Brazilian Real								http://www.scielo.br/revistas/rca/iinstruc.htm	Yes				2010	PDF, HTML, XML	animal culture, plant culture, aquaculture, forestry	English, Portuguese, Spanish; Castilian	http://www.scielo.br/revistas/rca/iedboard.htm	Peer review	http://www.scielo.br/revistas/rca/iinstruc.htm	http://www.scielo.br/revistas/rca/iinstruc.htm	http://www.scielo.br/revistas/rca/iinstruc.htm	Yes	http://www.scielo.br/revistas/rca/iinstruc.htm	14	http://www.scielo.br/revistas/rca/isubscrp.htm	Yes	http://www.scielo.br/scielo.php?script=sci_arttext&pid=S1806-66902015000300460&lng=en&nrm=iso&tlng=pt	CC BY		http://www.scielo.br/revistas/rca/isubscrp.htm	Yes		False
Egyptian Journal of Genetics and Cytology	http://journal.esg.net.eg/index.php/EJGC	EJGC	0046-161X		The Egyptian Society of Genetics		OJS	Egypt	Yes	http://journal.esg.net.eg/index.php/EJGC/about/submissions#authorFees	750	EGP - Egyptian Pound	Yes	http://journal.esg.net.eg/index.php/EJGC/about/submissions#authorFees	25	USD - US Dollar													2008	PDF	genetics, cytology, cell biology, biotechnology	English	http://journal.esg.net.eg/index.php/EJGC/about/editorialTeam	Peer review	http://journal.esg.net.eg/index.php/EJGC/about/editorialPolicies#peerReviewProcess	http://journal.esg.net.eg/index.php/EJGC/about/editorialPolicies#focusAndScope	http://journal.esg.net.eg/index.php/EJGC/about/submissions#authorGuidelines			12	http://journal.esg.net.eg/index.php/EJGC/about/editorialPolicies#openAccessPolicy			CC BY		http://journal.esg.net.eg/index.php/EJGC/about/editorialPolicies#openAccessPolicy	Yes		False
Fontes Linguae Vasconum	http://www.culturanavarra.es/en/fontes-linguae-vasconum	FLV, Fontes Linguae Vasconum. Studia et Documenta	0046-435X	2530-5832	Gobierno de Navarra	Gobierno de Navarra, Departamento de Cultura, Deporte y Juventud Dirección General de Cultura-Institución Príncipe de Viana		Spain	No	http://www.culturanavarra.es/es/fontes-linguae-vasconum				http://www.culturanavarra.es/es/fontes-linguae-vasconum											Yes				2007	PDF	basque, linguistics, literature, philology, basque language	Basque, English, Spanish; Castilian	http://www.culturanavarra.es/en/fontes-linguae-vasconum	Double blind peer review	http://www.culturanavarra.es/en/fontes-linguae-vasconum	http://www.culturanavarra.es/en/fontes-linguae-vasconum	http://www.culturanavarra.es/uploads/files/FLV_rules.pdf			15	http://www.culturanavarra.es/en/fontes-linguae-vasconum			CC BY-NC		http://www.culturanavarra.es/en/fontes-linguae-vasconum	Yes	Dulcinea	False
Jornal Brasileiro de Psiquiatria	http://www.scielo.br/scielo.php/script_sci_serial/pid_0047-2085/lng_en/nrm_iso		0047-2085	1982-0208	Universidade Federal do Rio de Janeiro		SciELO Brazil	Brazil	No	http://www.scielo.br/revistas/jbpsiq/iinstruc.htm#03				http://www.scielo.br/revistas/jbpsiq/iinstruc.htm#03											Yes	DOI	Yes	http://www.scielo.br/statjournal.php?lang=en&issn=0047-2085	2006	PDF, HTML, XML	psychiatry, mental health	English, Portuguese	http://www.scielo.br/revistas/jbpsiq/iedboard.htm	Blind peer review	http://www.scielo.br/revistas/jbpsiq/iinstruc.htm	http://www.scielo.br/revistas/jbpsiq/iinstruc.htm	http://www.scielo.br/revistas/jbpsiq/iinstruc.htm			20	http://www.scielo.br/revistas/jbpsiq/isubscrp.htm	Yes	http://www.scielo.br/scielo.php?script=sci_arttext&pid=S0047-20852014000400290&lng=en&nrm=iso&tlng=pt	CC BY		http://www.scielo.br/scielo.php/script_sci_serial/pid_0047-2085/lng_en/nrm_iso	Yes		False
New Zealand Journal of Forestry Science	http://www.nzjforestryscience.com/	NZJFS	0048-0134	1179-5395	SpringerOpen	Scion	SpringerOpen	United Kingdom	No	http://nzjforestryscience.springeropen.com/about				http://nzjforestryscience.springeropen.com/about							CLOCKSS, LOCKSS, Portico			http://www.springeropen.com/get-published/indexing-archiving-and-access-to-data/journal-archiving	Yes	DOI	Yes	http://nzjforestryscience.springeropen.com/articles/10.1186/s40490-016-0072-0	2013	PDF, HTML	forestry, climate change, forestry species	English	http://nzjforestryscience.springeropen.com/about/editorial-board	Blind peer review	http://nzjforestryscience.springeropen.com/about	http://nzjforestryscience.springeropen.com/about	http://nzjforestryscience.springeropen.com/submission-guidelines	Yes	http://nzjforestryscience.springeropen.com/submission-guidelines/editorial-policies	39	http://nzjforestryscience.springeropen.com/about	Yes	http://nzjforestryscience.springeropen.com/articles/10.1186/s40490-016-0072-0	CC BY		http://nzjforestryscience.springeropen.com/submission-guidelines/copyright	Yes	Sherpa/Romeo	True
Pakistan Heart Journal	http://www.pkheartjournal.com		0048-2706	2227-9199	Pakistan Cardiac Society	Pakistan Cardiac Society	OJS	Pakistan	No	http://www.pkheartjournal.com/index.php/pkheart/about/submissions#authorGuidelines				http://www.pkheartjournal.com/index.php/pkheart/about/submissions#authorGuidelines										http://www.pkheartjournal.com/index.php/pkheart/about/editorialPolicies#archiving					2011	PDF	cardiology	English	http://www.pkheartjournal.com/index.php/pkheart/about/editorialTeam	Blind peer review	http://www.pkheartjournal.com/index.php/pkheart/about/editorialPolicies#peerReviewProcess	http://www.pkheartjournal.com/index.php/pkheart/about/editorialPolicies#focusAndScope	http://www.pkheartjournal.com/index.php/pkheart/about/submissions#authorGuidelines	Yes	http://www.pkheartjournal.com/index.php/pkheart/about/submissions#authorGuidelines	6	http://www.pkheartjournal.com/index.php/pkheart/about/editorialPolicies#openAccessPolicy			CC BY		http://www.pkheartjournal.com/index.php/pkheart	Yes		False
Psihologija	http://www.doiserbia.nb.rs/Journal.aspx?ISSN=0048-5705		0048-5705	1451-9283	Drustvo Psihologa Srbije		doiSerbia	Serbia	No	http://doiserbia.nb.rs/journal.aspx?issn=0048-5705&pg=editorialpolicy#Open access policy				http://doiserbia.nb.rs/journal.aspx?issn=0048-5705&pg=editorialpolicy#Open access policy								National Library od Serbia	Scindeks	http://doiserbia.nb.rs/journal.aspx?issn=0048-5705&pg=editorialpolicy#Editorial policy	Yes	DOI			2002	PDF	psychology	English	http://doiserbia.nb.rs/journal.aspx?issn=0048-5705	Double blind peer review	http://doiserbia.nb.rs/journal.aspx?issn=0048-5705&pg=editorialpolicy#Peer review	http://doiserbia.nb.rs/journal.aspx?issn=0048-5705&pg=editorialpolicy	http://doiserbia.nb.rs/journal.aspx?issn=0048-5705&pg=instructionsforauthors	Yes	http://doiserbia.nb.rs/journal.aspx?issn=0048-5705&pg=editorialpolicy#Plagiarism	24	http://doiserbia.nb.rs/journal.aspx?issn=0048-5705&pg=editorialpolicy#Open access policy			CC BY-SA		http://doiserbia.nb.rs/journal.aspx?issn=0048-5705&pg=editorialpolicy#Copyright	Yes		True
Reumatismo	http://www.reumatismo.org	Reumatismo	0048-7449	2240-2683	PAGEPress Publications	SIR	OJS	Italy	No	http://reumatismo.org/index.php/reuma/pages/view/payments				http://reumatismo.org/index.php/reuma/pages/view/payments							Portico			http://www.pagepress.org/publishing-services/digital-preservation.html	Yes	DOI	Yes	http://reumatismo.org/index.php/reuma/article/view/914	2001	PDF	rheumatic diseases	English, Italian	http://www.reumatismo.org/index.php/reuma/pages/view/board	Blind peer review	http://www.reumatismo.org/index.php/reuma/about/editorialPolicies#peerReviewProcess	http://www.reumatismo.org/index.php/reuma/about/editorialPolicies#focusAndScope	http://www.reumatismo.org/index.php/reuma/about/submissions#authorGuidelines	Yes	http://www.reumatismo.org/index.php/reuma/pages/view/plagiarism	10	http://www.reumatismo.org/index.php/reuma/about/editorialPolicies#openAccessPolicy	Yes	http://www.reumatismo.org/index.php/reuma/article/view/914	CC BY-NC		http://www.reumatismo.org/index.php/reuma/about/submissions#copyrightNotice	Yes	Sherpa/Romeo	True
The Review of Regional Studies	http://journal.srsa.org/ojs/index.php/RRS/index		0048-749X	1553-0892	Southern Regional Science Association		OJS	United States	No	http://journal.srsa.org/ojs/index.php/RRS/index				http://journal.srsa.org/ojs/index.php/RRS/index							LOCKSS			http://journal.srsa.org/ojs/index.php/RRS/about/editorialPolicies#archiving	Yes				2011	PDF	regional science, economics	English	http://journal.srsa.org/ojs/index.php/RRS/about/editorialTeam	Double blind peer review	http://journal.srsa.org/ojs/index.php/RRS/about/editorialPolicies#peerReviewProcess	http://journal.srsa.org/ojs/index.php/RRS/about/editorialPolicies#focusAndScope	http://journal.srsa.org/ojs/index.php/RRS/about/submissions#authorGuidelines		http://journal.srsa.org/ojs/index.php/RRS/about/submissions#authorGuidelines	26	http://journal.srsa.org/ojs/index.php/RRS/about/editorialPolicies#openAccessPolicy			CC BY-NC-ND		http://journal.srsa.org/ojs/index.php/RRS/about/editorialPolicies#openAccessPolicy	Yes		False
Revista Chilena de Literatura	http://www.revistaliteratura.uchile.cl/		0048-7651	0718-2295	Universidad de Chile	Departamento de Literatura	OJS	Chile	No	http://www.revistaliteratura.uchile.cl/index.php/RCL/about/submissions#authorGuidelines				http://www.revistaliteratura.uchile.cl/index.php/RCL/about/submissions#authorGuidelines							CLOCKSS			http://www.revistaliteratura.uchile.cl/index.php/RCL/about/editorialPolicies#archiving					2004	PDF, HTML, ePUB	literature	Spanish; Castilian	http://www.revistaliteratura.uchile.cl/index.php/RCL/about/displayMembership/91	Double blind peer review	http://www.revistaliteratura.uchile.cl/index.php/RCL/about/editorialPolicies#peerReviewProcess	http://www.revistaliteratura.uchile.cl/index.php/RCL/about/editorialPolicies#focusAndScope	http://www.revistaliteratura.uchile.cl/index.php/RCL/about/submissions#authorGuidelines			24	http://www.revistaliteratura.uchile.cl/index.php/RCL/about/editorialPolicies#openAccessPolicy			CC BY-NC-ND		http://www.revistaliteratura.uchile.cl/index.php/RCL/about/submissions#copyrightNotice	Yes		True
Santiago	http://revistas.uo.edu.cu/index.php/stgo		0048-9115	2227-6513	Universidad de Oriente			Cuba	No	http://revistas.uo.edu.cu/index.php/stgo/about/editorialPolicies#custom-0				http://revistas.uo.edu.cu/index.php/stgo/about/editorialPolicies#custom-0										http://revistas.uo.edu.cu/index.php/stgo/about/editorialPolicies#openAccessPolicy					1998	PDF	sociology, history, linguistics, philosophy, law	Spanish; Castilian	http://revistas.uo.edu.cu/index.php/stgo/about/editorialTeam	Double blind peer review	http://revistas.uo.edu.cu/index.php/stgo/about/editorialPolicies#peerReviewProcess	http://revistas.uo.edu.cu/index.php/stgo/about/editorialPolicies#focusAndScope	http://revistas.uo.edu.cu/index.php/stgo/about/submissions#authorGuidelines			12	http://revistas.uo.edu.cu/index.php/stgo/about/editorialPolicies#openAccessPolicy			CC BY		http://revistas.uo.edu.cu/index.php/stgo/about/editorialPolicies#openAccessPolicy	Yes		False
Teología y Vida	http://www.scielo.cl/scielo.php?script=sci_serial&pid=0049-3449&lng=en&nrm=iso		0049-3449	0717-6295	Pontificia Universidad Católica de Chile		SciELO Chile	Chile	No																				2000		human sciences
Acta Agrobotanica	https://pbsociety.org.pl/journals/index.php/aa/index		0065-0951	2300-357X	Polish Botanical Society		OJS	Poland	Yes	https://pbsociety.org.pl/journals/index.php/aa/about/submissions#authorFees	100	EUR - Euro		https://pbsociety.org.pl/journals/index.php/aa/about/submissions#authorFees										https://pbsociety.org.pl/journals/index.php/aa/about/editorialPolicies#custom-8	Yes	DOI			2012	PDF	crops, weeds, urban plants, melliferous plants, nectar, pollination	English	https://pbsociety.org.pl/journals/index.php/aa/about/editorialTeam	Blind peer review	https://pbsociety.org.pl/journals/index.php/aa/about/editorialPolicies#peerReviewProcess	https://pbsociety.org.pl/journals/index.php/aa/about/editorialPolicies#focusAndScope	https://pbsociety.org.pl/journals/index.php/aa/about/submissions#authorGuidelines	Yes	https://pbsociety.org.pl/journals/index.php/aa/about/submissions#authorGuidelines	16	https://pbsociety.org.pl/journals/index.php/aa/about/editorialPolicies#openAccessPolicy			CC BY		https://pbsociety.org.pl/journals/index.php/aa/about/submissions#copyrightNotice	Yes	Sherpa/Romeo	True
Acta Baltico-Slavica	https://ispan.waw.pl/journals/index.php/abs/index		0065-1044	2392-2389	Institute of Slavic Studies, Polish Academy of Sciences	Institute of Slavic Studies, Polish Academy of Sciences	OJS	Poland	No	https://ispan.waw.pl/journals/index.php/abs/index				https://ispan.waw.pl/journals/index.php/abs/index											Yes	DOI			2014	PDF	language contact, multilingualism, Balto-Slavic borderland, multiculturalism	Belarusian, English, Lithuanian, Polish, Russian, Ukrainian	https://ispan.waw.pl/journals/index.php/abs/about/editorialTeam	Double blind peer review	https://ispan.waw.pl/journals/index.php/abs/about/editorialPolicies#peerReviewProcess	https://ispan.waw.pl/journals/index.php/abs/about/editorialPolicies#focusAndScope	https://ispan.waw.pl/journals/index.php/abs/about/submissions#authorGuidelines	Yes	https://ispan.waw.pl/journals/index.php/abs/about/editorialPolicies#custom-0	24	https://ispan.waw.pl/journals/index.php/abs/about/editorialPolicies#openAccessPolicy	Yes	https://ispan.waw.pl/journals/index.php/abs/article/view/abs.2014.008	CC BY		https://ispan.waw.pl/journals/index.php/abs/about/submissions#copyrightNotice	Yes		True
Anuario de Estudios Medievales	http://estudiosmedievales.revistas.csic.es		0066-5061	1988-4230	Consejo Superior de Investigaciones Científicas		OJS	Spain	No	http://estudiosmedievales.revistas.csic.es/index.php/estudiosmedievales/about/editorialPolicies				http://estudiosmedievales.revistas.csic.es/index.php/estudiosmedievales/about/editorialPolicies												DOI			1996	PDF	medieval history, medieval culture, medieval thought, medieval Spain, middle ages	Catalan; Valencian, English, French, Italian, Portuguese, Spanish; Castilian	http://estudiosmedievales.revistas.csic.es/index.php/estudiosmedievales/about/editorialTeam	Double blind peer review	http://estudiosmedievales.revistas.csic.es/index.php/estudiosmedievales/about/editorialPolicies#peerReviewProcess	http://estudiosmedievales.revistas.csic.es/index.php/estudiosmedievales/about/editorialPolicies#focusAndScope	http://estudiosmedievales.revistas.csic.es/index.php/estudiosmedievales/about/submissions#authorGuidelines			48	http://estudiosmedievales.revistas.csic.es/index.php/estudiosmedievales/about/editorialPolicies#openAccessPolicy			CC BY-NC		http://estudiosmedievales.revistas.csic.es/index.php/estudiosmedievales/about/submissions#copyrightNotice	Yes		False
Archivo Español de Arqueología	http://aespa.revistas.csic.es/		0066-6742	1988-3110	Consejo Superior de Investigaciones Científicas		OJS	Spain	No	http://aespa.revistas.csic.es/index.php/aespa/about/editorialPolicies#openAccessPolicy				http://aespa.revistas.csic.es/index.php/aespa/about/editorialPolicies												DOI			1996	PDF	archeology	English, Spanish; Castilian	http://aespa.revistas.csic.es/index.php/aespa/about/editorialTeam	Double blind peer review	http://aespa.revistas.csic.es/index.php/aespa/about/editorialPolicies#peerReviewProcess	http://aespa.revistas.csic.es/index.php/aespa/about/editorialPolicies#focusAndScope	http://aespa.revistas.csic.es/index.php/aespa/about/submissions#authorGuidelines			48	http://aespa.revistas.csic.es/index.php/aespa/about/editorialPolicies#openAccessPolicy			CC BY-NC		http://aespa.revistas.csic.es/index.php/aespa/index	Yes		False
Arheologia Moldovei	http://www.arheo.ro/arheologia-moldovei	Arheologia Moldovei	0066-7358		Romanian Academy	Institute of Archaeology Iasi	ERIH Plus	Romania	No	http://www.arheo.ro/arheologia-moldovei				http://www.arheo.ro/arheologia-moldovei										http://www.arheo.ro/arheologia-moldovei					2013	PDF	archaeology, history, Moldavia, ancient history, Byzantine, antiquity	English, French, German, Romanian; Moldavian; Moldovan	http://www.arheo.ro/arheologia-moldovei	Double blind peer review	http://www.arheo.ro/arheologia-moldovei	http://www.arheo.ro/arheologia-moldovei	http://arheo.ro/images/evenimente/AM%202015%20Instructions%20for%20authors.pdf	Yes	http://www.arheo.ro/arheologia-moldovei	12	http://www.arheo.ro/arheologia-moldovei			CC BY-NC-ND		http://www.arheo.ro/arheologia-moldovei	Yes		True
Arquivos Brasileiros de Cardiologia	http://www.scielo.br/scielo.php?script=sci_serial&pid=0066-782X&lng=en&nrm=iso		0066-782X	1678-4170	Sociedade Brasileira de Cardiologia (SBC)	Sociedade Brasileira de Cardiologia	SciELO Brazil	Brazil	No	http://www.scielo.br/revistas/abc/iinstruc.htm				http://www.scielo.br/revistas/abc/iinstruc.htm										http://www.scielo.br/revistas/abc/iaboutj.htm	Yes	DOI	Yes	http://www.scielo.br/statjournal.php?lang=en&issn=0066-782X	1997	PDF, HTML, XML	health sciences, cardiovascular disease	English, Portuguese	http://www.scielo.br/revistas/abc/iedboard.htm	Peer review	http://www.scielo.br/revistas/abc/iinstruc.htm	http://www.scielo.br/revistas/abc/iaboutj.htm	http://www.scielo.br/revistas/abc/iinstruc.htm		http://www.scielo.br/revistas/abc/iinstruc.htm	10	http://www.scielo.br/revistas/abc/isubscrp.htm	Yes	http://www.scielo.br/scielo.php?script=sci_arttext&pid=S0066-782X2015000600004&lng=en&nrm=iso&tlng=en	CC BY-NC		http://www.scielo.br/revistas/abc/iaboutj.htm	Yes		False
Boletim de Indústria Animal	http://revistas.bvs-vet.org.br/bia		0067-9615	1981-4100	Instituto de Zootecnia	Instituto de Zootecnia	OJS	Brazil	No	http://revistas.bvs-vet.org.br/bia/about/submissions#onlineSubmissions				http://revistas.bvs-vet.org.br/bia/about/submissions#onlineSubmissions										http://revistas.bvs-vet.org.br/bia/about/editorialPolicies#publicationFrequency	Yes	DOI			1974	PDF	genetical enhancement, animal science, animal health, forage, nutrition	English, Portuguese, Spanish; Castilian	http://revistas.bvs-vet.org.br/bia/about/editorialTeam	Peer review	http://revistas.bvs-vet.org.br/bia/about/editorialPolicies#peerReviewProcess	http://revistas.bvs-vet.org.br/bia/about/editorialPolicies#focusAndScope	http://revistas.bvs-vet.org.br/bia/about/submissions#authorGuidelines	Yes	http://revistas.bvs-vet.org.br/bia/about/editorialPolicies#peerReviewProcess	8	http://revistas.bvs-vet.org.br/bia/about/editorialPolicies#openAccessPolicy	Yes	http://revistas.bvs-vet.org.br/bia/article/view/26251	CC BY-NC		http://revistas.bvs-vet.org.br/bia/about/submissions#copyrightNotice	Yes	Diadorim	True
Boletín de Filología	https://boletinfilologia.uchile.cl/		0067-9674	0718-9303	Universidad de Chile	Universidad de Chile, Facultad de Filosofía y Humanidades	Open Journal System/OJS	Chile	No	https://boletinfilologia.uchile.cl/index.php/BDF/politicas				https://boletinfilologia.uchile.cl/index.php/BDF/politicas					Yes	https://boletinfilologia.uchile.cl/index.php/BDF/politicas	CLOCKSS			https://boletinfilologia.uchile.cl/index.php/BDF/politicas					1934	PDF	linguistics, language, philology, spanish language	Spanish; Castilian	https://boletinfilologia.uchile.cl/index.php/BDF/about/editorialTeam	Double blind peer review	https://boletinfilologia.uchile.cl/index.php/BDF/politicas	https://boletinfilologia.uchile.cl/index.php/BDF/about	https://boletinfilologia.uchile.cl/index.php/BDF/about/submissions			8	https://boletinfilologia.uchile.cl/index.php/BDF/politicas			CC BY-NC-ND		https://boletinfilologia.uchile.cl/index.php/BDF/about/submissions	Yes		True
Folia Forestalia Polonica: Series A - Forestry	http://www.degruyter.com/view/j/ffp		0071-6677	2199-5907	Sciendo	Forest Research Institute	Sciendo	Poland	No	http://www.degruyter.com/view/supplement/s00716677_Instruction_for_Authors.pdf				http://www.degruyter.com/view/supplement/s00716677_Instruction_for_Authors.pdf							Portico			http://www.degruyter.com/page/859	Yes	DOI			2008	PDF	forestry, agroforestry, ecology, environment and resource management	English	http://www.degruyter.com/view/j/ffp	Double blind peer review	http://www.degruyter.com/view/supplement/s00716677_Instruction_for_Authors.pdf	http://www.degruyter.com/view/j/ffp	http://www.degruyter.com/view/supplement/s00716677_Instruction_for_Authors.pdf	Yes	http://degruyteropen.com/dgopen-takes-a-further-step-to-ward-off-plagiarism/	8	http://degruyteropen.com/you/journal-author/open-access-statement/	Yes	http://www.degruyter.com/view/j/ffp.2014.56.issue-3/ffp-2014-0013/ffp-2014-0013.xml?format=INT	CC BY-NC-ND		http://www.degruyter.com/view/supplement/s00716677_Open_Access_License.pdf	Yes	Sherpa/Romeo	True
Historia (Santiago)	http://revistahistoria.uc.cl	Historia-UC	0073-2435	0717-7194	Instituto de Historia	Pontificia Universidad Católica de Chile		Chile	No	http://revistahistoria.uc.cl/sobre-la-revista/instrucciones-a-los-autores/				http://revistahistoria.uc.cl/sobre-la-revista/instrucciones-a-los-autores/															2000	PDF	social sciences, history, latin america, chile, politics	English, Portuguese, Spanish; Castilian	http://revistahistoria.uc.cl/sobre-la-revista/equipo/	Double blind peer review	http://revistahistoria.uc.cl/sobre-la-revista/instrucciones-a-los-autores/	http://revistahistoria.uc.cl/sobre-la-revista/	http://revistahistoria.uc.cl/sobre-la-revista/instrucciones-a-los-autores/			24	http://revistahistoria.uc.cl			Publisher's own license					False
Hoehnea	http://www.scielo.br/scielo.php?script=sci_serial&pid=2236-8906&nrm=iso&rep=&lng=pt		0073-2877	2236-8906	Instituto de Botânica	Instituto de Botânica	SciELO Brazil	Brazil	No	http://www.scielo.br/revistas/hoehnea/paboutj.htm				http://www.scielo.br/revistas/hoehnea/paboutj.htm											Yes	DOI	Yes	http://www.scielo.br/statjournal.php?lang=pt&issn=2236-8906&collection=scl	2007	PDF, HTML, ePDF	plant taxonomy, structural botany, plant physiology, biochemistry, plant ecology, ecological restoration	English, Portuguese, Spanish; Castilian	http://www.scielo.br/revistas/hoehnea/iedboard.htm	Peer review	http://www.scielo.br/revistas/hoehnea/iinstruc.htm	http://www.scielo.br/revistas/hoehnea/iaboutj.htm	http://www.scielo.br/revistas/hoehnea/iinstruc.htm	Yes	http://www.scielo.br/revistas/hoehnea/iinstruc.htm	52	http://www.scielo.br/revistas/hoehnea/iaboutj.htm	Yes	http://www.scielo.br/scielo.php?script=sci_arttext&pid=S2236-89062016000200159&lng=en&nrm=iso&tlng=pt	CC BY		http://www.scielo.br/scielo.php?script=sci_serial&pid=2236-8906&lng=en&nrm=iso	Yes		False
Iheringia: Série Botânica	http://isb.emnuvens.com.br/iheringia/index		0073-4705		Fundação Zoobotânica do Rio Grande do Sul	Museu de Ciências Naturais da Fundação Zoobotânica		Brazil	No	https://isb.emnuvens.com.br/iheringia/about/submissions#privacyStatement				https://isb.emnuvens.com.br/iheringia/about/submissions#privacyStatement											Yes				2004	PDF	biology, botany	English, Portuguese	http://isb.emnuvens.com.br/iheringia/about/editorialTeam	Blind peer review	http://isb.emnuvens.com.br/iheringia/about/editorialPolicies#peerReviewProcess	http://isb.emnuvens.com.br/iheringia/about/editorialPolicies#focusAndScope	http://isb.emnuvens.com.br/iheringia/about/submissions#authorGuidelines			30	http://isb.emnuvens.com.br/iheringia/about/editorialPolicies#openAccessPolicy			Publisher's own license	Attribution	http://isb.emnuvens.com.br/iheringia/about/editorialPolicies#openAccessPolicy	Yes	Diadorim	False
Iheringia: Série Zoologia	http://www.scielo.br/isz		0073-4721	1678-4766	Fundação Zoobotânica do Rio Grande do Sul		SciELO Brazil	Brazil	No	http://www.scielo.br/revistas/isz/iinstruc.htm#02				http://www.scielo.br/revistas/isz/iinstruc.htm#02											Yes	DOI	Yes	http://www.scielo.br/statjournal.php?lang=en&issn=0073-4721	2000	PDF, HTML	biological sciences	English, Portuguese, Spanish; Castilian	http://www.scielo.br/revistas/isz/iedboard.htm	Peer review	http://www.scielo.br/revistas/isz/iinstruc.htm	http://www.scielo.br/revistas/isz/iinstruc.htm	http://www.scielo.br/revistas/isz/iinstruc.htm			40	http://www.scielo.br/revistas/isz/isubscrp.htm	Yes	http://www.scielo.br/scielo.php?script=sci_arttext&pid=S0073-47212014000400001&lng=en&nrm=iso&tlng=en	CC BY		http://www.scielo.br/revistas/isz/iaboutj.htm	Yes		False
Memórias do Instituto Oswaldo Cruz.	http://www.scielo.br/scielo.php?pid=0074-0276&script=sci_serial	An International Journal of Biological and Biomedical Research	0074-0276	1678-8060	Instituto Oswaldo Cruz, Ministério da Saúde	Instituto Oswaldo Cruz, Ministério da Saúde	SciELO Brazil	Brazil	No	http://www.scielo.br/revistas/mioc/isubscrp.htm				http://www.scielo.br/revistas/mioc/isubscrp.htm											Yes	DOI	Yes	http://www.scielo.br/statjournal.php?lang=en&issn=0074-0276	1909	PDF, HTML, XML	biological sciences, health sciences	English	http://www.scielo.br/revistas/mioc/iedboard.htm	Peer review	http://www.scielo.br/revistas/mioc/iinstruc.htm	http://www.scielo.br/revistas/mioc/iinstruc.htm	http://www.scielo.br/revistas/mioc/iinstruc.htm	Yes	http://www.scielo.br/revistas/mioc/iinstruc.htm	16	http://www.scielo.br/revistas/mioc/isubscrp.htm	Yes	http://www.scielo.br/scielo.php?script=sci_arttext&pid=S0074-02762015000100056&lng=en&nrm=iso&tlng=en	CC BY		http://www.scielo.br/scielo.php?pid=0074-0276&script=sci_serial	Yes		False
The Iraqi Journal of Agricultural science	http://jcoagri.uobaghdad.edu.iq/	???? ?????? ???????? ????????	0075-0530	2410-0862	Baghdad University	College of Agriculture – University of Baghdad.		Iraq	Yes	http://jcoagri.uobaghdad.edu.iq/index.php/intro/ethics3	75	USD - US Dollar	Yes	http://jcoagri.uobaghdad.edu.iq/index.php/intro/ethics3	25000	IQD - Iraqi Dinar						Iraqi Academic Scientific Journals		http://www.iasj.net/iasj?func=issues&jId=4&uiLanguage=en	Yes				2005	PDF	plant sciences, animal sciences, agricultural economics, basic sciences	Arabic, English	http://jcoagri.uobaghdad.edu.iq/index.php/intro/about/editorialTeam	Peer review	http://jcoagri.uobaghdad.edu.iq/index.php/intro/ethics3	http://jcoagri.uobaghdad.edu.iq/index.php/intro/about	http://jcoagri.uobaghdad.edu.iq/index.php/intro/ethics3			6	http://jcoagri.uobaghdad.edu.iq/			CC BY		http://jcoagri.uobaghdad.edu.iq/index.php/intro/ethics1	Yes		False
Koedoe: African Protected Area Conservation and Science	http://www.koedoe.co.za		0075-6458	2071-0771	AOSIS	SANParks	OJS	South Africa	Yes	http://koedoe.co.za/index.php/koedoe/pages/view/authors#6	1091	ZAR - Rand		http://koedoe.co.za/index.php/koedoe/pages/view/authors#3					Yes	http://koedoe.co.za/index.php/koedoe/pages/view/authors#6	Portico	South African Government Libraries		http://koedoe.co.za/index.php/koedoe/pages/view/about#7	Yes	DOI	Yes	http://koedoe.co.za/index.php/koedoe/article/view/1233	1958	PDF, HTML, ePUB, XML	conservation, protected areas, resource management, policy, zoology	English	http://koedoe.co.za/index.php/koedoe/pages/view/editorial-team	Double blind peer review	http://koedoe.co.za/index.php/koedoe/pages/view/about#5	http://koedoe.co.za/index.php/koedoe/pages/view/about#2	http://koedoe.co.za/index.php/koedoe/pages/view/authors	Yes	http://koedoe.co.za/index.php/koedoe/pages/view/newsubmission#4	20	http://koedoe.co.za/index.php/koedoe/pages/view/about#4	Yes	http://koedoe.co.za/index.php/koedoe/article/view/1246/1737	CC BY		http://koedoe.co.za/index.php/koedoe/pages/view/authors#4	Yes	Sherpa/Romeo	True
Lódzkie Studia Etnograficzne	http://apcz.umk.pl/czasopisma/index.php/LSE		0076-0382	2450-5544	Polskie Towarzystwo Ludoznawcze	Polskie Towarzystwo Ludoznawcze	OJS	Poland	No	http://apcz.umk.pl/czasopisma/index.php/LSE/about/submissions#authorGuidelines				http://apcz.umk.pl/czasopisma/index.php/LSE/about/submissions#authorGuidelines								https://do.bn.org.pl/		http://apcz.umk.pl/czasopisma/index.php/LSE	Yes	DOI			2015	PDF	ethnology, anthropology, culture, folklore, heritage, field studies	English, Polish	http://apcz.umk.pl/czasopisma/index.php/LSE/about/editorialPolicies#custom-1	Double blind peer review	http://apcz.umk.pl/czasopisma/index.php/LSE/about/editorialPolicies#peerReviewProcess	http://apcz.umk.pl/czasopisma/index.php/LSE/about/editorialPolicies#focusAndScope	http://apcz.umk.pl/czasopisma/index.php/LSE/about/submissions#authorGuidelines			8	http://apcz.umk.pl/czasopisma/index.php/LSE/about/editorialPolicies#openAccessPolicy			CC BY-ND		http://apcz.umk.pl/czasopisma/index.php/LSE/about/editorialPolicies#openAccessPolicy	Yes		True
Mélanges CRAPEL	http://www.atilf.fr/spip.php?rubrique217		0077-2712		Centre National de la Recherche Scientifique	Analyse et Traitement Informatique de la Langue Française		France	No	http://atilf.fr/spip.php?rubrique217&idfirst=4069				http://atilf.fr/spip.php?rubrique217&idfirst=4069											Yes				1970	PDF	self-directed learning, multilingualism, crosscultural issues, language learning, language teaching, ITC	English, French, Portuguese, Spanish; Castilian	http://atilf.fr/spip.php?rubrique217&idfirst=802	Double blind peer review	http://atilf.fr/spip.php?rubrique217&idfirst=4025	http://atilf.fr/spip.php?rubrique217&idfirst=4024	http://atilf.fr/spip.php?rubrique217&idfirst=4025	Yes	http://atilf.fr/spip.php?rubrique217&idfirst=4069	32	http://atilf.fr/spip.php?rubrique217&idfirst=4069			CC BY-NC-ND		http://atilf.fr/spip.php?rubrique217&idfirst=4069	Yes		True
Oceanologia	http://www.journals.elsevier.com/oceanologia/		0078-3234		Elsevier	Institute of Oceanology of the Polish Academy of Sciences	www.sciencedirect.com	Netherlands	No	https://www.elsevier.com/journals/oceanologia/0078-3234/guide-for-authors				https://www.elsevier.com/journals/oceanologia/0078-3234/guide-for-authors					Yes	http://www.elsevier.com/about/corporate-responsibility/research-4-life/research-4-life-programs	CLOCKSS, Portico	Koninklijke Bibliotheek		http://www.elsevier.com/editors/policies/independent-digital-archives		DOI			2011	PDF, HTML	oceanography, earth science	English	http://www.journals.elsevier.com/oceanologia/editorial-board	Open peer review	https://www.elsevier.com/journals/oceanologia/0078-3234/guide-for-authors	http://www.journals.elsevier.com/oceanologia/	https://www.elsevier.com/journals/oceanologia/0078-3234/guide-for-authors	Yes	http://www.elsevier.com/editors/perk/plagiarism-detection	24	https://www.elsevier.com/journals/oceanologia/0078-3234/guide-for-authors	Yes	http://www.sciencedirect.com/science/article/pii/S0078323415000895	CC BY-NC-ND		https://www.elsevier.com/journals/oceanologia/0078-3234/guide-for-authors	Yes	Sherpa/Romeo	False
RAUSP: Revista de Administração da Universidade de São Paulo	http://www.scielo.br/scielo.php?script=sci_serial&pid=0080-2107&lng=en&nrm=iso		0080-2107	1984-6142	Universidade de São Paulo		SciELO	Brazil	No	http://www.scielo.br/revistas/rausp/iinstruc.htm#022				http://www.scielo.br/revistas/rausp/iinstruc.htm#022										http://www.scielo.br/revistas/rausp/iinstruc.htm	Yes	DOI			2011	PDF, HTML, XML	business administration, management, social entrepreneurship	English, Portuguese, Spanish; Castilian	http://www.scielo.br/revistas/rausp/iedboard.htm	Double blind peer review	http://www.scielo.br/revistas/rausp/iinstruc.htm	http://www.scielo.br/revistas/rausp/iinstruc.htm	http://www.scielo.br/revistas/rausp/iinstruc.htm			16	http://www.scielo.br/revistas/rausp/iinstruc.htm#022	Yes	http://www.scielo.br/scielo.php?script=sci_arttext&pid=S0080-21072015000300277&lng=en&nrm=iso&tlng=pt	CC BY		http://www.scielo.br/scielo.php?script=sci_serial&pid=0080-2107&lng=en&nrm=iso	Yes		False
Revista da Escola de Enfermagem da USP	http://www.scielo.br/scielo.php?script=sci_serial&pid=0080-6234&lng=en&nrm=iso		0080-6234	1980-220X	Universidade de São Paulo		SciELO Brazil	Brazil	Yes	http://www.scielo.br/revistas/reeusp/iinstruc.htm#01	360	USD - US Dollar	Yes	http://www.scielo.br/revistas/reeusp/iinstruc.htm#01	50	USD - US Dollar								http://www.scielo.br/revistas/reeusp/iinstruc.htm	Yes				1996	PDF, HTML, XML	nursing	English, Portuguese, Spanish; Castilian	http://www.scielo.br/revistas/reeusp/iedboard.htm	Blind peer review	http://www.scielo.br/revistas/reeusp/iinstruc.htm	http://www.scielo.br/revistas/reeusp/iinstruc.htm	http://www.scielo.br/revistas/reeusp/iinstruc.htm	Yes	http://www.scielo.br/revistas/reeusp/iinstruc.htm	9	http://www.scielo.br/revistas/reeusp/isubscrp.htm	Yes	http://www.scielo.br/scielo.php?script=sci_arttext&pid=S0080-62342015000400540&lng=en&nrm=iso&tlng=en	CC BY		http://www.scielo.br/revistas/reeusp/isubscrp.htm	Yes		False
Studia Anglica Posnaniensia	http://www.degruyter.com/view/j/stap		0081-6272	2082-5102	Sciendo	Adam Mickiewicz University, Poznan, Poland	Sciendo	Poland	No	http://www.degruyter.com/view/supplement/s00816272_Advice_to_Authors.pdf				http://www.degruyter.com/view/supplement/s00816272_Advice_to_Authors.pdf							Portico			http://www.degruyter.com/page/860	Yes	DOI			2009	PDF	linguistics, literary studies, English language studies	English	http://www.degruyter.com/view/j/stap	Double blind peer review	http://www.degruyter.com/view/j/stap	http://www.degruyter.com/view/j/stap	http://www.degruyter.com/view/j/stap	Yes	http://degruyteropen.com/versita-takes-a-further-step-to-ward-off-plagiarism/	15	http://degruyteropen.com/you/journal-author/open-access-statement/	Yes	http://www.degruyter.com/view/j/stap.2014.49.issue-2/stap-2014-0007/stap-2014-0007.xml?format=INT	CC BY-NC-ND		http://degruyteropen.com/you/journal-author/copyright-and-license-statement/	Yes	Sherpa/Romeo	True
Studia Historiae Oeconomicae	https://www.degruyter.com/view/j/sho		0081-6485		Sciendo	Adam Mickiewicz University, Institute of History	Sciendo	Poland	No	https://www.degruyter.com/view/supplement/s00816485_Instructions_for_Authors_and_Editorial_Policy.pdf				https://www.degruyter.com/view/supplement/s00816485_Instructions_for_Authors_and_Editorial_Policy.pdf							Portico			http://www.degruyter.com/page/859	Yes	DOI			2013	PDF	economic history, social history, history of economic thought, economic crime, economic privileges, industry	English	https://www.degruyter.com/view/j/sho	Double blind peer review	https://www.degruyter.com/view/supplement/s00816485_Instructions_for_Authors_and_Editorial_Policy.pdf	https://www.degruyter.com/view/j/sho	https://www.degruyter.com/view/supplement/s00816485_Instructions_for_Authors_and_Editorial_Policy.pdf	Yes	http://www.degruyter.com/page/859	15	http://www.degruyter.com/page/943	Yes	https://www.degruyter.com/view/j/sho.2016.34.issue-1/sho-2016-0001/sho-2016-0001.xml?format=INT	CC BY-NC-ND		https://www.degruyter.com/view/supplement/s00816485_Open_Access_License.pdf	Yes	Sherpa/Romeo	False
Studia z Filologii Polskiej i Slowianskiej	https://ispan.waw.pl/journals/index.php/sfps/index		0081-7090	2392-2435	Institute of Slavic Studies, Polish Academy of Sciences	Institute of Slavic Studies, Polish Academy of Sciences	OJS	Poland	No	https://ispan.waw.pl/journals/index.php/sfps/index				https://ispan.waw.pl/journals/index.php/sfps/index											Yes	DOI			2014	PDF	Slavic philology, Slavic languages, contrastive studies, linguistics, synchrony, diachrony	Belarusian, English, Polish, Russian, Ukrainian	https://ispan.waw.pl/journals/index.php/sfps/about/editorialTeam	Double blind peer review	https://ispan.waw.pl/journals/index.php/sfps/about/editorialPolicies#peerReviewProcess	https://ispan.waw.pl/journals/index.php/sfps/about/editorialPolicies#focusAndScope	https://ispan.waw.pl/journals/index.php/sfps/about/submissions#authorGuidelines	Yes	https://ispan.waw.pl/journals/index.php/sfps/about/editorialPolicies#custom-0	48	https://ispan.waw.pl/journals/index.php/sfps/about/editorialPolicies#openAccessPolicy		https://ispan.waw.pl/journals/index.php/sfps/article/view/sfps.2014.005	CC BY		https://ispan.waw.pl/journals/index.php/sfps/about/submissions#copyrightNotice	Yes	Sherpa/Romeo	True
Trabajos de Prehistoria	http://tp.revistas.csic.es		0082-5638	1988-3218	Consejo Superior de Investigaciones Científicas		OJS	Spain	No	http://tp.revistas.csic.es/index.php/tp/about/editorialPolicies#openAccessPolicy				http://tp.revistas.csic.es/index.php/tp/about/editorialPolicies												DOI			1988	PDF	prehistoric archaeology, cultural heritage management, Iberian Peninsula	English, French, Spanish; Castilian	http://tp.revistas.csic.es/index.php/tp/about/editorialTeam	Double blind peer review	http://tp.revistas.csic.es/index.php/tp/about/editorialPolicies#peerReviewProcess	http://tp.revistas.csic.es/index.php/tp/about/editorialPolicies#focusAndScope	http://tp.revistas.csic.es/index.php/tp/about/submissions#authorGuidelines			48	http://tp.revistas.csic.es/index.php/tp/about/editorialPolicies#openAccessPolicy			CC BY-NC		http://tp.revistas.csic.es/index.php/tp	Yes		False
Natalia	http://natalia.org.za/natalia.html	NATALIA Journal of the Natal Society Foundation	0085-3674		The Natal Society Foundation	The Natal Society Foundation Trust		South Africa	No	http://natalia.org.za/natalia.html				http://natalia.org.za/natalia.html											Yes				2012	PDF	natal, colonial natal, history, victoriana	English	http://natalia.org.za/editorial_board.html	Double blind peer review	http://natalia.org.za/information_authors.html	http://natalia.org.za/natalia.html	http://natalia.org.za/Files/Style-guide.pdf			47	http://natalia.org.za/natalia.html			CC BY-NC-SA		http://natalia.org.za/natalia.html	Yes		False
Revista Brasileira de Entomologia	https://www.journals.elsevier.com/revista-brasileira-de-entomologia/		0085-5626	1806-9665	Elsevier	Sociedade Brasileira de Entomologia	www.sciencedirect.com	Netherlands	No	https://www.elsevier.com/journals/revista-brasileira-de-entomologia/0085-5626/open-access-journal				https://www.elsevier.com/journals/revista-brasileira-de-entomologia/0085-5626/open-access-journal					Yes	http://www.elsevier.com/about/corporate-responsibility/research-4-life/research-4-life-programs	CLOCKSS, Portico	Koninklijke Bibliotheek		https://www.elsevier.com/about/our-business/policies/digital-archive	Yes	DOI			2015	PDF, HTML	entomology, systematics, diversity, evolution of insects	English	https://www.journals.elsevier.com/revista-brasileira-de-entomologia/editorial-board	Blind peer review	https://www.elsevier.com/journals/revista-brasileira-de-entomologia/0085-5626/guide-for-authors	https://www.journals.elsevier.com/revista-brasileira-de-entomologia/	https://www.elsevier.com/journals/revista-brasileira-de-entomologia/0085-5626/guide-for-authors	Yes	https://www.elsevier.com/editors/perk/plagiarism-complaints/plagiarism-detection	16	https://www.elsevier.com/journals/revista-brasileira-de-entomologia/0085-5626/open-access-journal	Yes	http://www.sciencedirect.com/science/article/pii/S0085562617300031	CC BY-NC-ND		https://www.elsevier.com/journals/revista-brasileira-de-entomologia/0085-5626/open-access-journal	Yes		False
Sociološki Pregled	http://scindeks.ceon.rs/journalDetails.aspx?issn=0085-6320&lang=en		0085-6320	2560-4880	Sociological Society of Serbia, Belgrade		SCIndeks: Serbian Citation Index	Serbia	No	http://scindeks.ceon.rs/PublicationPolicy.aspx?issn=0085-6320&lang=en#ppAC			Yes	http://scindeks.ceon.rs/PublicationPolicy.aspx?issn=0085-6320&lang=en#ppAC	5000	RSD - Serbian Dinar			Yes	http://scindeks.ceon.rs/PublicationPolicy.aspx?issn=0085-6320&lang=en#ppAC		National Library of Serbia		http://scindeks.ceon.rs/journalDetails.aspx?issn=0085-6320	Yes	DOI	Yes	http://scindeks.ceon.rs/article.aspx?query=ISSID%26and%2613550&page=2&sort=8&stype=0&backurl=%2fissue.aspx%3fissue%3d13550	2000	PDF	sociology, sociological research	English	http://scindeks.ceon.rs/EditorialBoard.aspx?issn=0085-6320&lang=en	Double blind peer review	http://scindeks.ceon.rs/PublicationPolicy.aspx?issn=0085-6320&lang=en#ppRT	http://scindeks.ceon.rs/Portrait.aspx?issn=0085-6320	http://scindeks.ceon.rs/InstructionForAuthors.aspx?issn=0085-6320			4	http://scindeks.ceon.rs/PublicationPolicy.aspx?issn=0085-6320&lang=en#ppOA			CC BY-SA		http://scindeks.ceon.rs/PublicationPolicy.aspx?issn=0085-6320&lang=en#ppLC	Yes		True
Antarctic Record	http://www.nipr.ac.jp/library/en/ar/index.html	Nankyoku Shiryo	0085-7289	2432-079X	National Institute of Polar Research		JAIRO Cloud	Japan	No	http://www.nipr.ac.jp/library/en/ar/guide.html				http://www.nipr.ac.jp/library/en/ar/guide.html											Yes	DOI	Yes	http://doi.org/10.15094/00011003	2002	PDF	Japanese Antarctic research expedition, Antarctic, Arctic, polar region	English, Japanese	http://www.nipr.ac.jp/library/en/ar/editorial_board.html	Blind peer review	http://www.nipr.ac.jp/library/en/ar/reviewers.html	http://www.nipr.ac.jp/library/en/ar/index.html	http://www.nipr.ac.jp/library/en/ar/guide.html			12	http://www.nipr.ac.jp/library/en/ar/kitei.html	Yes	http://doi.org/10.15094/00011003	CC BY		http://www.nipr.ac.jp/library/en/ar/kitei.html	Yes		False
Fishery Bulletin	https://spo.nmfs.noaa.gov/fb.htm		0090-0656	1937-4518	National Marine Fisheries Service			United States	No	https://spo.nmfs.noaa.gov/fb.htm				https://spo.nmfs.noaa.gov/fb.htm											Yes	DOI			1881	PDF	marine mammals, fisheries, marine fisheries, ichthyology	English	https://spo.nmfs.noaa.gov/sites/default/files/fbmasthead.pdf	Double blind peer review	https://spo.nmfs.noaa.gov/sites/default/files/guidelines.pdf	https://spo.nmfs.noaa.gov/fb.htm	https://spo.nmfs.noaa.gov/sites/default/files/guidelines.pdf	Yes	https://spo.nmfs.noaa.gov/sites/default/files/guidelines.pdf	30	https://spo.nmfs.noaa.gov/fb.htm			public domain	Share Alike	https://spo.nmfs.noaa.gov/sites/default/files/guidelines.pdf	Yes		False
Environmental Health Perspectives	http://ehp.niehs.nih.gov/	EHP online	0091-6765		The National Institute of Environmental Health Sciences (NIEHS)			United States	No	http://ehp.niehs.nih.gov/open-access/				http://ehp.niehs.nih.gov/open-access/							PMC/Europe PMC/PMC Canada			http://ehp.niehs.nih.gov/wp-content/uploads/2015/06/EHP_Overview_06_2015.pdf	Yes	DOI			1972	PDF, HTML	public health and safety, environmental studies, toxicology, environmental sciences	English	http://ehp.niehs.nih.gov/editorial-board/	Peer review	http://ehp.niehs.nih.gov/instructions-to-authors/#submit	http://ehp.niehs.nih.gov/journal-information/	http://ehp.niehs.nih.gov/instructions-to-authors/	Yes	http://ehp.niehs.nih.gov/instructions-to-authors/#integ	24	http://ehp.niehs.nih.gov/open-access/			Publisher's own license	Attribution	http://ehp.niehs.nih.gov/journal-information/	Yes		False
Revista Brasileira de Ciência do Solo	http://www.scielo.br/scielo.php/script_sci_serial/pid_0100-0683/lng_en/nrm_iso		0100-0683	1806-9657	Sociedade Brasileira de Ciência do Solo	Sociedade Brasileira de Ciência do Solo	SciELO Brazil	Brazil	Yes	http://www.scielo.br/revistas/rbcs/iinstruc.htm#fees	1200	USD - US Dollar		http://www.scielo.br/revistas/rbcs/iinstruc.htm#fees											Yes	DOI	Yes	http://www.scielo.br/statjournal.php?lang=en&issn=0100-0683	2003	PDF, HTML, XML	agricultural sciences	English, Portuguese	http://www.scielo.br/revistas/rbcs/iedboard.htm	Peer review	http://www.scielo.br/revistas/rbcs/iinstruc.htm	http://www.scielo.br/revistas/rbcs/iinstruc.htm	http://www.scielo.br/revistas/rbcs/iinstruc.htm			32	http://www.scielo.br/revistas/rbcs/isubscrp.htm	Yes	http://www.scielo.br/scielo.php?script=sci_arttext&pid=S0100-06832015000100040&lng=en&nrm=iso&tlng=en	CC BY		http://www.scielo.br/revistas/rbcs/isubscrp.htm	Yes		False
Revista de Medicina da UFC	http://periodicos.ufc.br/revistademedicinadaufc/index		0100-1302	2447-6595	Universidade Federal do Ceará	Universidade Federal do Ceará, Faculdade de Medicina	OJS	Brazil	No	http://periodicos.ufc.br/revistademedicinadaufc/about/submissions#authorGuidelines				http://periodicos.ufc.br/revistademedicinadaufc/about/submissions#authorGuidelines										http://periodicos.ufc.br/revistademedicinadaufc/about/editorialPolicies#archiving		DOI			2015	PDF	health sciences, medicine	English, Portuguese	http://periodicos.ufc.br/revistademedicinadaufc/about/editorialTeam	Peer review	http://periodicos.ufc.br/revistademedicinadaufc/about/editorialPolicies#peerReviewProcess	http://periodicos.ufc.br/revistademedicinadaufc/about/editorialPolicies#focusAndScope	http://periodicos.ufc.br/revistademedicinadaufc/about/submissions#authorGuidelines	Yes	http://periodicos.ufc.br/revistademedicinadaufc/about/submissions#authorGuidelines	16	http://periodicos.ufc.br/revistademedicinadaufc/about/editorialPolicies#openAccessPolicy	Yes	http://periodicos.ufc.br/revistademedicinadaufc/article/view/19823	CC BY		http://periodicos.ufc.br/revistademedicinadaufc/index	Yes	Diadorim	False
Cadernos de Pesquisa	http://www.scielo.br/scielo.php/script_sci_serial/pid_0100-1574/lng_en/nrm_iso	CP	0100-1574		Fundação Carlos Chagas		SciELO Brazil	Brazil	No	http://www.scielo.br/revistas/cp/iinstruc.htm#01				http://www.scielo.br/revistas/cp/iinstruc.htm#01											Yes	DOI			1999	PDF, HTML, XML	gender, race	English, Portuguese, Spanish; Castilian	http://www.scielo.br/revistas/cp/iedboard.htm	Editorial review	http://www.scielo.br/revistas/cp/iinstruc.htm	http://www.scielo.br/revistas/cp/iaboutj.htm	http://www.scielo.br/revistas/cp/iinstruc.htm			14	http://www.scielo.br/revistas/cp/isubscrp.htm	Yes	http://www.scielo.br/scielo.php?script=sci_arttext&pid=S0100-15742015000100056&lng=en&nrm=iso&tlng=pt	CC BY-NC		http://www.scielo.br/revistas/cp/iaboutj.htm	Yes		False
Pesquisa Agropecuária Brasileira	http://www.scielo.br/scielo.php?pid=0100-204X&script=sci_serial		0100-204X	1678-3921	Embrapa Informação Tecnológica		SciELO Brazil	Brazil	No	http://www.scielo.br/revistas/pab/iinstruc.htm				http://www.scielo.br/revistas/pab/iinstruc.htm							CLOCKSS			http://seer.sct.embrapa.br/index.php/pab/about/editorialPolicies#archiving	Yes	DOI	Yes	http://www.scielo.br/statjournal.php?lang=en&issn=0100-204X	1999	PDF, HTML, XML	agricultural sciences	English, Portuguese, Spanish; Castilian	http://www.scielo.br/revistas/pab/iedboard.htm	Peer review	http://www.scielo.br/revistas/pab/iinstruc.htm	http://www.scielo.br/revistas/pab/iinstruc.htm	http://www.scielo.br/revistas/pab/iinstruc.htm			28	http://www.scielo.br/revistas/pab/isubscrp.htm	Yes	http://www.scielo.br/scielo.php?script=sci_arttext&pid=S0100-204X2015000200115&lng=en&nrm=iso&tlng=pt	CC BY		http://www.scielo.br/scielo.php?pid=0100-204X&script=sci_serial	Yes		False
Brazilian Journal of Veterinary Medicine	http://rbmv.org/index.php/BJVM	Revista Brasileira de Medicina Veterinária	0100-2430	2527-2179	Sociedade de Medicina Veterinária do Estado do Rio de Janeiro	Sociedade de Medicina Veterinária do Estado do Rio de Janeiro	OJS	Brazil	Yes	http://rbmv.org/index.php/BJVM/about	100	USD - US Dollar		http://rbmv.org/index.php/BJVM/about											Yes				2014	PDF	animal reproduction, animal pathology, preventive veterinary medicine, veterinary medicine, clinic and surgery veterinary	English, Portuguese	http://rbmv.org/index.php/BJVM/about/editorialTeam	Double blind peer review	http://rbmv.org/index.php/BJVM/about/submissions	http://rbmv.org/index.php/BJVM/about	http://rbmv.org/index.php/BJVM/about/submissions			16	http://rbmv.org/index.php/BJVM/about			CC BY		http://rbmv.org/index.php/BJVM/about	Yes	Diadorim	True
Revista Brasileira de Fruticultura	http://www.scielo.br/scielo.php/script_sci_serial/pid_0100-2945/lng_pt/nrm_iso		0100-2945	1806-9967	Sociedade Brasileira de Fruticultura		SciELO Brazil	Brazil	Yes	http://www.scielo.br/revistas/rbf/iinstruc.htm#001	1400	BRL - Brazilian Real		http://www.scielo.br/revistas/rbf/iinstruc.htm#001										http://www.scielo.br/revistas/rbf/iinstruc.htm	Yes				2001	PDF, HTML, XML	agricultural sciences, horticulture	English, Portuguese, Spanish; Castilian	http://www.scielo.br/revistas/rbf/iedboard.htm	Double blind peer review	http://www.scielo.br/revistas/rbf/iinstruc.htm	http://www.scielo.br/revistas/rbf/iinstruc.htm	http://www.scielo.br/revistas/rbf/iinstruc.htm	Yes	http://www.scielo.br/revistas/rbf/iinstruc.htm	14	http://www.scielo.br/revistas/rbf/isubscrp.htm	Yes	http://www.scielo.br/scielo.php?script=sci_arttext&pid=S0100-29452001000200004&lng=en&nrm=iso&tlng=pt	CC BY		http://www.scielo.br/revistas/rbf/iaboutj.htm	Yes		False
Educação & Realidade	http://seer.ufrgs.br/educacaoerealidade		0100-3143	2175-6236	Universidade Federal do Rio Grande do Sul	Universidade Federal do Rio Grande do Sul, Faculdade de Educação	OJS	Brazil	No	http://seer.ufrgs.br/index.php/educacaoerealidade/about/submissions#authorGuidelines				http://seer.ufrgs.br/index.php/educacaoerealidade/about/submissions#authorGuidelines							CLOCKSS			http://seer.ufrgs.br/index.php/educacaoerealidade/about/editorialPolicies#archiving	Yes				1999	PDF	education, social sciences, humanities	English, Portuguese, Spanish; Castilian	http://seer.ufrgs.br/index.php/educacaoerealidade/about/editorialTeam	Double blind peer review	http://seer.ufrgs.br/index.php/educacaoerealidade/about/editorialPolicies#peerReviewProcess	http://seer.ufrgs.br/index.php/educacaoerealidade/about/editorialPolicies#focusAndScope	http://seer.ufrgs.br/index.php/educacaoerealidade/about/submissions#authorGuidelines			17	http://seer.ufrgs.br/index.php/educacaoerealidade/about/editorialPolicies#openAccessPolicy	Yes	http://seer.ufrgs.br/index.php/educacaoerealidade/article/view/41601	CC BY		http://seer.ufrgs.br/index.php/educacaoerealidade/about/submissions#copyrightNotice	Yes		False
Revista Caatinga	http://periodicos.ufersa.edu.br/revistas/index.php/sistema		0100-316X	1983-2125	Universidade Federal Rural do Semi-Árido	Universidade Federal Rural do Semi-Árido	OJS	Brazil	Yes	http://proppg.ufersa.edu.br/wp-content/uploads/sites/11/2016/03/RevistaCaatinga_TAXAS-e-ORIENTACOES-PARA-PAGAMENTO.pdf	300	BRL - Brazilian Real	Yes	http://proppg.ufersa.edu.br/wp-content/uploads/sites/11/2016/03/RevistaCaatinga_TAXAS-e-ORIENTACOES-PARA-PAGAMENTO.pdf	100	BRL - Brazilian Real					LOCKSS			https://thekeepers.org/journals?query=1983-2125					2006	PDF, XML	Biology, Agriculture, Natural resources, Plant Sciences	English	http://periodicos.ufersa.edu.br/revistas/index.php/sistema/about/editorialTeam	Blind peer review	http://periodicos.ufersa.edu.br/revistas/index.php/sistema/about/editorialPolicies#peerReviewProcess	http://periodicos.ufersa.edu.br/revistas/index.php/sistema/about/editorialPolicies#focusAndScope	http://periodicos.ufersa.edu.br/revistas/index.php/sistema/about/submissions#onlineSubmissions			48	http://periodicos.ufersa.edu.br/revistas/index.php/sistema/about/editorialPolicies#openAccessPolicy			CC BY		http://periodicos.ufersa.edu.br/revistas/index.php/sistema/about/editorialPolicies#openAccessPolicy	Yes	Sherpa/Romeo	False
Revista do Instituto de Latícinios Cândido Tostes	http://www.revistadoilct.com.br/rilct/index	Journal of Candido Tostes Dairy Institute	0100-3674	2238-6416	Empresa de Pesquisa Agropecuária de Minas Gerais (EPAMIG)	Candido Tostes Dairy	OJS	Brazil	No															http://www.revistadoilct.com.br/rilct/about/editorialPolicies#archiving	Yes	DOI		http://www.revistadoilct.com.br/rilct/manager/statistics	2008	PDF, HTML	milk, dairy products, technology	English, Portuguese	http://www.revistadoilct.com.br/rilct/about/editorialTeam	Blind peer review	http://www.revistadoilct.com.br/rilct/about/editorialPolicies#peerReviewProcess	http://www.revistadoilct.com.br/rilct/about/editorialPolicies#peerReviewProcess	http://www.revistadoilct.com.br/rilct/about/submissions#onlineSubmissions			4	http://www.revistadoilct.com.br/rilct/about/editorialPolicies#openAccessPolicy			CC BY		http://www.revistadoilct.com.br/rilct/index	Yes		False
Radiologia Brasileira	http://www.scielo.br/scielo.php/script_sci_serial/pid_0100-3984/lng_en/nrm_iso		0100-3984	1678-7099	Colégio Brasileiro de Radiologia e Diagnóstico por Imagem		SciELO Brazil	Brazil	No	http://www.scielo.br/revistas/rb/iinstruc.htm#005				http://www.scielo.br/revistas/rb/iinstruc.htm#005											Yes	DOI	Yes	http://www.scielo.br/statjournal.php?lang=en&issn=0100-3984	2001	PDF, HTML, XML	health sciences	English, Portuguese	http://www.scielo.br/revistas/rb/iedboard.htm	Peer review	http://www.scielo.br/revistas/rb/iinstruc.htm	http://www.scielo.br/revistas/rb/iinstruc.htm	http://www.scielo.br/revistas/rb/iinstruc.htm			28	http://www.scielo.br/revistas/rb/iaboutj.htm	Yes	http://www.scielo.br/scielo.php?script=sci_arttext&pid=S0100-39842015000100012&lng=en&nrm=iso&tlng=en	CC BY		http://www.scielo.br/scielo.php/script_sci_serial/pid_0100-3984/lng_en/nrm_iso	Yes		False
Química Nova	http://www.scielo.br/scielo.php/script_sci_serial/pid_0100-4042/lng_en/nrm_iso		0100-4042	1678-7064	Sociedade Brasileira de Química	Sociedade Brasileira de Química	SciELO Brazil	Brazil	Yes	http://www.scielo.br/revistas/qn/iinstruc.htm#01	330	USD - US Dollar		http://www.scielo.br/revistas/qn/iinstruc.htm#01										http://www.scielo.br/statjournal.php?lang=en&issn=0100-4042	Yes	DOI	Yes	http://www.scielo.br/statjournal.php?lang=en&issn=0100-4042	1997	PDF, HTML, XML	exact and earth sciences	English, Portuguese, Spanish; Castilian	http://www.scielo.br/revistas/qn/iedboard.htm	Peer review	http://www.scielo.br/revistas/qn/iinstruc.htm	http://www.scielo.br/revistas/qn/iinstruc.htm	http://www.scielo.br/revistas/qn/iinstruc.htm			12	http://www.scielo.br/revistas/qn/isubscrp.htm	Yes	http://www.scielo.br/scielo.php?script=sci_arttext&pid=S0100-40422015000200202&lng=en&nrm=iso&tlng=pt	CC BY-NC		http://www.scielo.br/scielo.php/script_sci_serial/pid_0100-4042/lng_en/nrm_iso	Yes		False
Kriterion	http://www.scielo.br/scielo.php/script_sci_serial/pid_0100-512X/lng_en/nrm_iso		0100-512X		Universidade Federal de Minas Gerais		SciELO Brazil	Brazil	No	http://www.scielo.br/revistas/kr/iinstruc.htm#002				http://www.scielo.br/revistas/kr/iinstruc.htm#002											Yes	DOI	Yes	http://www.scielo.br/statjournal.php?lang=en&issn=0100-512	2001	PDF, HTML	philosophical theory	English, French, German, Italian, Portuguese, Spanish; Castilian	http://www.scielo.br/revistas/kr/iedboard.htm	Blind peer review	http://www.scielo.br/revistas/kr/iinstruc.htm	http://www.scielo.br/revistas/kr/iinstruc.htm	http://www.scielo.br/revistas/kr/iinstruc.htm			28	http://www.scielo.br/revistas/kr/isubscrp.htm	Yes	http://www.scielo.br/scielo.php?script=sci_arttext&pid=S0100-512X2014000200001&lng=en&nrm=iso&tlng=pt	CC BY		http://www.scielo.br/scielo.php/script_sci_serial/pid_0100-512X/lng_en/nrm_iso	Yes		False
Summa Phytopathologica	http://www.scielo.br/scielo.php/script_sci_serial/pid_0100-5405/lng_en/nrm_iso		0100-5405		Grupo Paulista de Fitopatologia		SciELO Brazil	Brazil	Yes	http://www.scielo.br/revistas/sp/iinstruc.htm	100	BRL - Brazilian Real		http://www.scielo.br/revistas/sp/iinstruc.htm										http://www.scielo.br/revistas/sp/iinstruc.htm	Yes	DOI	Yes	http://www.scielo.br/statjournal.php?lang=en&issn=0100-5405	2006	PDF, HTML, XML	plant pathology, phytopathology	English, Portuguese, Spanish; Castilian	http://www.scielo.br/revistas/sp/iedboard.htm	Peer review	http://www.scielo.br/revistas/sp/iinstruc.htm	http://www.scielo.br/revistas/sp/iinstruc.htm	http://www.scielo.br/revistas/sp/iinstruc.htm	Yes	http://www.scielo.br/revistas/sp/iinstruc.htm	12	http://www.scielo.br/revistas/sp/isubscrp.htm	Yes	http://www.scielo.br/scielo.php?script=sci_arttext&pid=S0100-54052015000400256&lng=en&nrm=iso&tlng=en	CC BY		http://www.scielo.br/revistas/sp/isubscrp.htm	Yes		False
Manuscrito	http://www.scielo.br/scielo.php?script=sci_serial&pid=0100-6045&lng=en&nrm=iso		0100-6045	2317-630X	Universidade Estadual de Campinas	Centro de Lógica, Epistemologia e História da Ciência	SciELO Brazil	Brazil	No	http://www.scielo.br/revistas/man/iinstruc.htm				http://www.scielo.br/revistas/man/iinstruc.htm							CLOCKSS			http://www.scielo.br/revistas/man/pinstruc.htm	Yes		Yes	http://www.scielo.br/statjournal.php?lang=en&issn=0100-6045	2011	PDF, HTML, XML	philosophy, history of philosophy, epistemology, aesthetics, logic, philosophy of language	English, Portuguese, Spanish; Castilian	http://www.scielo.br/revistas/man/iedboard.htm	Blind peer review	http://www.scielo.br/revistas/man/iinstruc.htm	http://www.scielo.br/revistas/man/iinstruc.htm	http://www.scielo.br/revistas/man/iinstruc.htm			32	http://www.scielo.br/revistas/man/paboutj.htm	Yes	http://www.scielo.br/scielo.php?script=sci_arttext&pid=S0100-60452014000100001&lng=en&nrm=iso&tlng=en	CC BY		http://www.scielo.br/revistas/man/iaboutj.htm	Yes		False
Revista Árvore	http://www.scielo.br/scielo.php?script=sci_serial&pid=0100-6762&lng=en&nrm=iso		0100-6762	1806-9088	Sociedade de Investigações Florestais	Sociedade de Investigações Florestais	SciELO Brazil	Brazil	No	http://www.scielo.br/revistas/rarv/iinstruc.htm#003				http://www.scielo.br/revistas/rarv/iinstruc.htm#003											Yes	DOI	Yes	http://www.scielo.br/statjournal.php?lang=en&issn=0100-6762	2002	PDF, HTML, XML	agricultural sciences	English, Portuguese, Spanish; Castilian	http://www.scielo.br/revistas/rarv/iedboard.htm	Peer review	http://www.scielo.br/revistas/rarv/iinstruc.htm	http://www.scielo.br/revistas/rarv/iinstruc.htm	http://www.scielo.br/revistas/rarv/iinstruc.htm			32	http://www.scielo.br/revistas/rarv/isubscrp.htm	Yes	http://www.scielo.br/scielo.php?script=sci_arttext&pid=S0100-67622015000100008&lng=en&nrm=iso&tlng=pt	CC BY		http://www.scielo.br/revistas/rarv/isubscrp.htm	Yes		False
Engenharia Agrícola	http://www.scielo.br/scielo.php/script_sci_serial/pid_0100-6916/lng_en/nrm_iso		0100-6916		Sociedade Brasileira de Engenharia Agrícola		SciELO Brazil	Brazil	Yes	http://www.scielo.br/revistas/eagri/iinstruc.htm	110	BRL - Brazilian Real	Yes	http://www.scielo.br/revistas/eagri/iinstruc.htm	310	BRL - Brazilian Real									Yes	DOI			2004	PDF, HTML, XML	agricultural engineering	English, Portuguese, Spanish; Castilian	http://www.scielo.br/revistas/eagri/iedboard.htm	Blind peer review	http://www.scielo.br/revistas/eagri/iinstruc.htm	http://www.scielo.br/scielo.php?script=sci_serial&pid=0100-6916&lng=en&nrm=iso	http://www.scielo.br/revistas/eagri/iinstruc.htm			52	http://www.scielo.br/revistas/eagri/isubscrp.htm	Yes	http://www.scielo.br/scielo.php?script=sci_arttext&pid=S0100-69162015000300406&lng=en&nrm=iso&tlng=pt	CC BY		http://www.scielo.br/revistas/eagri/iaboutj.htm	Yes		False
Revista do Colégio Brasileiro de Cirurgiões	http://www.scielo.br/scielo.php/script_sci_serial/pid_0100-6991/lng_en/nrm_iso		0100-6991	1809-4546	Colégio Brasileiro de Cirurgiões		SciELO Brazil	Brazil	Yes	http://www.scielo.br/revistas/rcbc/iinstruc.htm	1000	BRL - Brazilian Real		http://www.scielo.br/revistas/rcbc/iinstruc.htm										http://www.scielo.br/revistas/rcbc/iinstruc.htm	Yes				1998	PDF, HTML, XML	surgery	English, Portuguese, Spanish; Castilian	http://www.scielo.br/revistas/rcbc/iedboard.htm	Double blind peer review	http://www.scielo.br/revistas/rcbc/iinstruc.htm#001	http://www.scielo.br/revistas/rcbc/iinstruc.htm	http://www.scielo.br/revistas/rcbc/iinstruc.htm			12	http://www.scielo.br/revistas/rcbc/isubscrp.htm	Yes	http://www.scielo.br/scielo.php?script=sci_arttext&pid=S0100-69912015000400143&lng=en&nrm=iso&tlng=en	CC BY		http://www.scielo.br/scielo.php/script_sci_serial/pid_0100-6991/lng_en/nrm_iso			False
Revista Brasileira de Ginecologia e Obstetrícia	http://www.scielo.br/scielo.php/script_sci_serial/pid_0100-7203/lng_pt/nrm_iso	Revista da Federação Brasileira das Sociedades de Ginecologia e Obstetrícia	0100-7203		Federação Brasileira das Sociedades de Ginecologia e Obstetrícia		SciELO Brazil	Brazil	No	http://www.scielo.br/revistas/rbgo/iinstruc.htm				http://www.scielo.br/revistas/rbgo/iinstruc.htm										http://www.scielo.br/revistas/rbgo/iinstruc.htm	Yes				1998	PDF, HTML, XML	health sciences	English, Portuguese	http://www.scielo.br/revistas/rbgo/iedboard.htm	Peer review	http://www.scielo.br/revistas/rbgo/iinstruc.htm	http://www.scielo.br/revistas/rbgo/iinstruc.htm	http://www.scielo.br/revistas/rbgo/iinstruc.htm			12	http://www.scielo.br/revistas/rbgo/isubscrp.htm	Yes	http://www.scielo.br/scielo.php?script=sci_arttext&pid=S0100-72032015000900402&lng=en&nrm=iso&tlng=pt	CC BY		http://www.scielo.br/revistas/rbgo/isubscrp.htm	Yes		False
Pesquisa Veterinária Brasileira	http://www.scielo.br/scielo.php/script_sci_serial/pid_0100-736X/lng_pt/nrm_iso	Brazilian Journal of Veterinary Research	0100-736X	1678-5150	Colégio Brasileiro de Patologia Animal (CBPA)		SciELO Brazil	Brazil	Yes	http://www.scielo.br/revistas/pvb/iinstruc.htm	480	USD - US Dollar		http://www.scielo.br/revistas/pvb/iinstruc.htm											Yes	DOI	Yes	http://www.scielo.br/statjournal.php?lang=en&issn=0100-736X	1997	PDF, HTML, XML	agricultural sciences	English, Portuguese	http://www.scielo.br/revistas/pvb/iedboard.htm	Peer review	http://www.scielo.br/revistas/pvb/iinstruc.htm	http://www.scielo.br/revistas/pvb/iinstruc.htm	http://www.scielo.br/revistas/pvb/iinstruc.htm			12	http://www.scielo.br/revistas/pvb/isubscrp.htm	Yes	http://www.scielo.br/scielo.php?script=sci_arttext&pid=S0100-736X2014001200006&lng=pt&nrm=iso&tlng=pt	CC BY-NC		http://www.scielo.br/scielo.php/script_sci_serial/pid_0100-736X/lng_pt/nrm_iso	Yes		False
Planta Daninha	http://www.scielo.br/scielo.php?script=sci_serial&pid=0100-8358&nrm=iso&lng=en		0100-8358		Sociedade Brasileira da Ciência das Plantas Daninhas	Sociedade Brasileira da Ciência das Plantas Daninhas	SciELO Brazil	Brazil	Yes	http://www.scielo.br/revistas/pd/iinstruc.htm	300	BRL - Brazilian Real		http://www.scielo.br/revistas/pd/iinstruc.htm											Yes	DOI			1994	PDF, HTML, XML	biology, physiology, plant-decontaminating values, herbicides, growth regulators, defoliants	English, Portuguese, Spanish; Castilian	http://www.scielo.br/revistas/pd/iedboard.htm	Peer review	http://www.scielo.br/revistas/pd/iinstruc.htm	http://www.scielo.br/scielo.php?script=sci_serial&pid=0100-8358&nrm=iso&lng=en	http://www.scielo.br/revistas/pd/iinstruc.htm			16	http://www.scielo.br/revistas/pd/isubscrp.htm	Yes	http://www.scielo.br/scielo.php?script=sci_arttext&pid=S0100-83582015000100067&lng=en&nrm=iso&tlng=en	CC BY-NC		http://www.scielo.br/scielo.php?script=sci_serial&pid=0100-8358&nrm=iso&lng=en	Yes		False
Religião e Sociedade	http://www.scielo.br/scielo.php?script=sci_serial&pid=0100-8587&lng=en&nrm=iso		0100-8587	1984-0438	Instituto de Estudos da Religião	Instituto de Estudos da Religião	SciELO Brazil	Brazil	No	http://www.scielo.br/revistas/rs/iinstruc.htm#003				http://www.scielo.br/revistas/rs/iinstruc.htm#003											Yes	DOI	Yes	http://www.scielo.br/statjournal.php?lang=en&issn=0100-8587	2007	PDF, HTML, XML	humanities, history, theology	Portuguese, Spanish; Castilian	http://www.scielo.br/revistas/rs/iedboard.htm	Double blind peer review	http://www.scielo.br/revistas/rs/iinstruc.htm	http://www.scielo.br/scielo.php?script=sci_serial&pid=0100-8587&lng=en&nrm=iso	http://www.scielo.br/revistas/rs/iinstruc.htm			16	http://www.scielo.br/revistas/rs/isubscrp.htm	Yes	http://www.scielo.br/scielo.php?script=sci_arttext&pid=S0100-85872015000100087&lng=en&nrm=iso&tlng=pt	CC BY-NC		http://www.scielo.br/scielo.php?script=sci_serial&pid=0100-8587&lng=en&nrm=iso	Yes		False
Arquivos Brasileiros de Psicologia	http://pepsic.bvsalud.org/scielo.php?script=sci_serial&pid=1809-5267&nrm=iso&rep=&lng=pt		0100-8692	1809-5267	Universidade Federal do Rio de Janeiro		PEPSIC Brazil	Brazil	No																		Yes	http://pepsic.bvsalud.org/scielo.php?script=sci_serial&pid=1809-5267&lng=pt&nrm=iso	2003	PDF, HTML	society, mental health, children and adolescents	English, Portuguese, Spanish; Castilian	http://pepsic.bvsalud.org/revistas/arbp/pedboard.htm	Double blind peer review	http://pepsic.bvsalud.org/revistas/arbp/pinstruc.htm	http://pepsic.bvsalud.org/revistas/arbp/paboutj.htm	http://pepsic.bvsalud.org/revistas/arbp/pinstruc.htm			16	http://pepsic.bvsalud.org/scielo.php?script=sci_serial&pid=1809-5267&lng=pt&nrm=iso			CC BY-NC		http://pepsic.bvsalud.org/scielo.php?lng=pt	Yes	Sherpa/Romeo, Diadorim	True
Brazilian Journal of Medical and Biological Research	http://www.scielo.br/scielo.php?script=sci_serial&pid=0100-879X&lng=en&nrm=iso		0100-879X	1414-431X	Associação Brasileira de Divulgação Científica	Associação Brasileira de Divulgação Científica	SciELO Brazil	Brazil	Yes	http://www.scielo.br/revistas/bjmbr/iinstruc.htm	1400	USD - US Dollar	Yes	http://www.scielo.br/revistas/bjmbr/iinstruc.htm	50	BRL - Brazilian Real									Yes	DOI	Yes	http://www.scielo.br/statjournal.php?lang=en&issn=0100-879X	1997	PDF, HTML, XML	medicine, biology	English	http://www.scielo.br/revistas/bjmbr/iedboard.htm	Peer review	http://www.scielo.br/revistas/bjmbr/iinstruc.htm	http://www.scielo.br/scielo.php?script=sci_serial&pid=0100-879X&lng=en&nrm=iso	http://www.scielo.br/revistas/bjmbr/iinstruc.htm			22	http://www.scielo.br/revistas/bjmbr/isubscrp.htm	Yes	http://www.scielo.br/scielo.php?script=sci_arttext&pid=S0100-879X2015000900777&lng=en&nrm=iso&tlng=en	CC BY		http://www.scielo.br/revistas/bjmbr/iaboutj.htm	Yes		False
Revista de Odontologia da UNESP	http://www.revodontolunesp.com.br		0101-1774	1807-2577	Universidade Estadual Paulista	Universidade Estadual Paulista		Brazil	Yes	http://www.revodontolunesp.com.br/submission	450	BRL - Brazilian Real		http://www.revodontolunesp.com.br/submission											Yes				1990	PDF	dentistry, dental studies	English, Portuguese	http://www.revodontolunesp.com.br/board	Blind peer review	http://www.revodontolunesp.com.br/submission	http://www.revodontolunesp.com.br/index	http://www.revodontolunesp.com.br/submission			15	http://www.revodontolunesp.com.br/submission			CC BY		http://www.revodontolunesp.com.br/submission	Yes		False
Signo	http://online.unisc.br/seer/index.php/signo/index		0101-1812	1982-2014	Universidade de Santa Cruz do Sul		OJS	Brazil	No	https://online.unisc.br/seer/index.php/signo/about/editorialPolicies#peerReviewProcess				https://online.unisc.br/seer/index.php/signo/about/editorialPolicies#peerReviewProcess											Yes				2007	PDF	literature, linguistics, education	Portuguese	http://online.unisc.br/seer/index.php/signo/about/editorialTeam	Peer review	http://online.unisc.br/seer/index.php/signo/about/editorialPolicies#peerReviewProcess	http://online.unisc.br/seer/index.php/signo/about/editorialPolicies#focusAndScope	http://online.unisc.br/seer/index.php/signo/about/submissions#authorGuidelines			24	http://online.unisc.br/seer/index.php/signo/about/editorialPolicies#openAccessPolicy	Yes	https://online.unisc.br/seer/index.php/signo/article/view/4669	CC BY		https://online.unisc.br/seer/index.php/signo/about/editorialPolicies#openAccessPolicy	Yes	Diadorim	False
Food Science and Technology	http://www.scielo.br/cta	Ciência e Tecnologia de Alimentos	0101-2061	1678-457X	Sociedade Brasileira de Ciência e Tecnologia de Alimentos	Sociedade Brasileira de Ciência e Tecnologia de Alimentos	SciELO Brazil	Brazil	Yes	http://www.scielo.br/revistas/cta/iinstruc.htm	220	USD - US Dollar		http://www.scielo.br/revistas/cta/iinstruc.htm													Yes	http://www.scielo.br/statjournal.php?lang=en&issn=0101-2061	1997	PDF, HTML	agricultural sciences, exact and earth sciences	English	http://www.scielo.br/revistas/cta/iedboard.htm	Double blind peer review	http://www.scielo.br/revistas/cta/iinstruc.htm	http://www.scielo.br/revistas/cta/iaboutj.htm	http://www.scielo.br/revistas/cta/iinstruc.htm			12	http://www.scielo.br/revistas/cta/isubscrp.htm	Yes	http://www.scielo.br/scielo.php?script=sci_arttext&pid=S0101-20612014000400015&lng=en&nrm=iso&tlng=en	CC BY-NC		http://www.scielo.br/scielo.php?script=sci_serial&pid=0101-2061&lng=en&nrm=iso	Yes		False
Comunicação & Sociedade	https://www.metodista.br/revistas/revistas-ims/index.php/CSO		0101-2657	2175-7755	Universidade Metodista de São Paulo		OJS	Brazil	No	https://www.metodista.br/revistas/revistas-metodista/index.php/CSO/about/submissions#onlineSubmissions				https://www.metodista.br/revistas/revistas-metodista/index.php/CSO/about/submissions#onlineSubmissions											Yes	DOI			2009	PDF	communication, communitarian communication, communication technology, media	Portuguese	https://www.metodista.br/revistas/revistas-ims/index.php/CSO/about/editorialTeam	Peer review	https://www.metodista.br/revistas/revistas-ims/index.php/CSO/about/editorialPolicies#peerReviewProcess	https://www.metodista.br/revistas/revistas-ims/index.php/CSO/about/editorialPolicies#focusAndScope	https://www.metodista.br/revistas/revistas-ims/index.php/CSO/about/submissions#authorGuidelines			24	https://www.metodista.br/revistas/revistas-ims/index.php/CSO/about/editorialPolicies#openAccessPolicy	Yes	https://www.metodista.br/revistas/revistas-ims/index.php/CSO/article/view/4880	CC BY-NC		https://www.metodista.br/revistas/revistas-ims/index.php/CSO/about/submissions#copyrightNotice	Yes	Diadorim	False
Brazilian Journal of Nephrology	http://www.scielo.br/scielo.php?script=sci_serial&pid=0101-2800&lng=en&nrm=iso	Jornal Brasileiro de Nefrologia	0101-2800	2175-8239	Sociedade Brasileira de Nefrologia		SciELO Brazil	Brazil	No	http://www.scielo.br/revistas/jbn/iinstruc.htm#01				http://www.scielo.br/revistas/jbn/iinstruc.htm#01											Yes	DOI	Yes	http://www.scielo.br/statjournal.php?lang=en&issn=0101-2800	2009	PDF, HTML, XML	nephrology, kidney diseases	English, Portuguese	http://www.scielo.br/revistas/jbn/iedboard.htm	Blind peer review	http://www.scielo.br/revistas/jbn/iinstruc.htm	http://www.scielo.br/revistas/jbn/iinstruc.htm	http://www.scielo.br/revistas/jbn/iinstruc.htm			16	http://www.scielo.br/revistas/jbn/isubscrp.htm	Yes	http://www.scielo.br/scielo.php?script=sci_arttext&pid=S0101-28002015000100019&lng=en&nrm=iso&tlng=en	CC BY		http://www.scielo.br/revistas/jbn/isubscrp.htm	Yes		False
Estudos Teológicos	http://www.est.edu.br/periodicos/index.php/estudos_teologicos		0101-3130	2237-6461	Escola Superior de Teologia	Escola Superior de Teologia	OJS	Brazil	No	http://periodicos.est.edu.br/index.php/estudos_teologicos				http://periodicos.est.edu.br/index.php/estudos_teologicos							LOCKSS			http://periodicos.est.edu.br/index.php/estudos_teologicos/about/editorialPolicies#archiving					2003	PDF	christianity, theology, religion studies	English, German, Portuguese, Spanish; Castilian	http://periodicos.est.edu.br/index.php/estudos_teologicos/about/editorialTeam	Blind peer review	http://periodicos.est.edu.br/index.php/estudos_teologicos/about/editorialPolicies#peerReviewProcess	http://periodicos.est.edu.br/index.php/estudos_teologicos/about/editorialPolicies#focusAndScope	http://periodicos.est.edu.br/index.php/estudos_teologicos/about/submissions#authorGuidelines			12	http://periodicos.est.edu.br/index.php/estudos_teologicos/about/editorialPolicies#openAccessPolicy	Yes	http://periodicos.est.edu.br/index.php/estudos_teologicos/article/view/2542/2401	CC BY-NC-ND		http://periodicos.est.edu.br/index.php/estudos_teologicos/index	Yes		False
Brazilian Journal of Political Economy	http://www.scielo.br/scielo.php/script_sci_serial/pid_0101-3157/lng_en/nrm_iso	Revista de Economia Política	0101-3157	1809-4538	Editora 34		SciELO Brazil	Brazil	No	http://www.scielo.br/revistas/rep/iinstruc.htm				http://www.scielo.br/revistas/rep/iinstruc.htm										http://www.scielo.br/revistas/rep/iinstruc.htm	Yes				2005	PDF, HTML, XML	economic theory, political science	English, Portuguese	http://www.scielo.br/revistas/rep/iedboard.htm	Peer review	http://www.scielo.br/revistas/rep/iinstruc.htm#002	http://www.scielo.br/revistas/rep/iinstruc.htm	http://www.scielo.br/revistas/rep/iinstruc.htm			21	http://www.scielo.br/revistas/rep/isubscrp.htm	Yes	http://www.scielo.br/scielo.php?script=sci_arttext&pid=S0101-31572015000200247&lng=en&nrm=iso&tlng=en	CC BY		http://www.scielo.br/revistas/rep/isubscrp.htm	Yes		False
Trans/Form/Ação	http://www.scielo.br/scielo.php/script_sci_serial/pid_0101-3173/lng_en/nrm_iso		0101-3173	1980-539X	Universidade Estadual Paulista		SciELO Brazil	Brazil	No	http://www.scielo.br/revistas/trans/iinstruc.htm#001				http://www.scielo.br/revistas/trans/iinstruc.htm#001										http://www.scielo.br/revistas/trans/iinstruc.htm	Yes				1974	PDF, HTML, XML	philosophical theory	English, Portuguese	http://www.scielo.br/revistas/trans/iedboard.htm	Blind peer review	http://www.scielo.br/revistas/trans/iinstruc.htm	http://www.scielo.br/revistas/trans/iinstruc.htm	http://www.scielo.br/revistas/trans/iinstruc.htm			17	http://www.scielo.br/revistas/trans/isubscrp.htm	Yes	http://www.scielo.br/scielo.php?script=sci_arttext&pid=S0101-31732015000200053&lng=en&nrm=iso&tlng=es	CC BY		http://www.scielo.br/scielo.php/script_sci_serial/pid_0101-3173/lng_en/nrm_iso	Yes		False
Cadernos Cedes	http://www.scielo.br/scielo.php?script=sci_serial&pid=0101-3262&lng=en&nrm=iso		0101-3262	1678-7110	Centro de Estudos Educação e Sociedade, CEDES		SciELO Brazil	Brazil	No	http://www.scielo.br/revistas/ccedes/iinstruc.htm				http://www.scielo.br/revistas/ccedes/iinstruc.htm											Yes	DOI			1999	PDF, HTML, XML	society	English, Portuguese	http://www.scielo.br/revistas/ccedes/iedboard.htm	Double blind peer review	http://www.scielo.br/revistas/ccedes/iinstruc.htm	http://www.scielo.br/revistas/ccedes/iaboutj.htm	http://www.scielo.br/revistas/ccedes/iinstruc.htm			15	http://www.scielo.br/revistas/ccedes/isubscrp.htm	Yes	http://www.scielo.br/scielo.php?script=sci_arttext&pid=S0101-32622015000100057&lng=en&nrm=iso&tlng=pt	CC BY-NC		http://www.scielo.br/revistas/ccedes/iaboutj.htm	Yes		False
Revista Brasileira de Ciências do Esporte	http://www.scielo.br/scielo.php?script=sci_serial&pid=0101-3289&lng=en&nrm=iso		0101-3289	2179-3255	Colégio Brasileiro de Ciências do Esporte		SciELO Brazil	Brazil	No	http://www.scielo.br/revistas/rbce/iinstruc.htm#01				http://www.scielo.br/revistas/rbce/iinstruc.htm#01											Yes	DOI	Yes	http://www.scielo.br/statjournal.php?lang=en&issn=0101-3289	2011	PDF, HTML, XML	physical education, sport science	English, Portuguese, Spanish; Castilian	http://www.scielo.br/revistas/rbce/iedboard.htm	Blind peer review	http://www.scielo.br/revistas/rbce/iinstruc.htm	http://www.scielo.br/revistas/rbce/iaboutj.htm	http://www.scielo.br/revistas/rbce/iinstruc.htm			20	http://www.scielo.br/revistas/rbce/isubscrp.htm	Yes	http://www.scielo.br/scielo.php?script=sci_arttext&pid=S0101-32892015000200119&lng=en&nrm=iso&tlng=en	CC BY-NC-ND		http://www.scielo.br/scielo.php?script=sci_serial&pid=0101-3289&lng=en&nrm=iso	Yes		False
Novos Estudos CEBRAP	http://novosestudos.uol.com.br/	Novos Estudos	0101-3300	1980-5403	Centro Brasileiro de Análise e Planejamento	Centro Brasileiro de Análise e Planejamento	OJS	Brazil	No	http://novosestudos.uol.com.br/submissoes/				http://novosestudos.uol.com.br/submissoes/												DOI			1981	PDF	social sciences, human sciences, sociology	Portuguese	http://novosestudos.uol.com.br/sobre/	Peer review	http://novosestudos.uol.com.br/submissoes/	http://novosestudos.uol.com.br/sobre/	http://novosestudos.uol.com.br/submissoes/			20	http://novosestudos.uol.com.br/submissoes/			CC BY		http://novosestudos.uol.com.br/submissoes/	Yes		False
Letras de Hoje	http://www.scielo.br/scielo.php?script=sci_serial&pid=1984-7726	Letras de Hoje: Estudos e Debates em Linguística, Literatura e Língua Portuguesa	0101-3335	1984-7726	Pontifícia Universidade Católica do Rio Grande do Sul	Pontifícia Universidade Católica do Rio Grande do Sul	OJS	Brazil	No	http://revistaseletronicas.pucrs.br/ojs/index.php/fale/about/editorialPolicies#custom-8				http://revistaseletronicas.pucrs.br/ojs/index.php/fale/about/editorialPolicies#custom-8										http://revistaseletronicas.pucrs.br/ojs/index.php/fale/about/editorialPolicies#archiving	Yes				1967	PDF	linguistics, literature, literary theory	Portuguese, Spanish; Castilian	http://revistaseletronicas.pucrs.br/ojs/index.php/fale/about/editorialTeam	Double blind peer review	http://revistaseletronicas.pucrs.br/ojs/index.php/fale/about/editorialPolicies#peerReviewProcess	http://revistaseletronicas.pucrs.br/ojs/index.php/fale/about/editorialPolicies#focusAndScope	http://revistaseletronicas.pucrs.br/ojs/index.php/fale/about/submissions#authorGuidelines			10	http://revistaseletronicas.pucrs.br/ojs/index.php/fale/about/editorialPolicies#openAccessPolicy	Yes	http://revistaseletronicas.pucrs.br/ojs/index.php/fale/article/view/18475/12371	CC BY		http://revistaseletronicas.pucrs.br/ojs/index.php/fale/index	Yes	Sherpa/Romeo, Diadorim	True
Estudos Ibero Americanos	http://revistaseletronicas.pucrs.br/iberoamericana/ojs/index.php/iberoamericana		0101-4064	1980-864X	Editora da Pontifícia Universidade Católica do Rio Grande do Sul (EDIPUCRS)	Pontifícia Universidade Católica do Rio Grande do Sul	OJS	Brazil	No	http://revistaseletronicas.pucrs.br/ojs/index.php/iberoamericana/about/editorialPolicies#custom-6				http://revistaseletronicas.pucrs.br/ojs/index.php/iberoamericana/about/editorialPolicies#custom-6								Biblioteca Nacional do Brasil		http://revistaseletronicas.pucrs.br/ojs/index.php/iberoamericana/about/editorialPolicies#archiving	Yes	DOI			2004	PDF	history, Ibero-America, Latin America	Portuguese, Spanish; Castilian	http://revistaseletronicas.pucrs.br/ojs/index.php/iberoamericana/about/editorialTeam	Double blind peer review	http://revistaseletronicas.pucrs.br/ojs/index.php/iberoamericana/about/editorialPolicies#peerReviewProcess	http://revistaseletronicas.pucrs.br/ojs/index.php/iberoamericana/about/editorialPolicies#focusAndScope	http://revistaseletronicas.pucrs.br/ojs/index.php/iberoamericana/about/submissions#authorGuidelines			10	http://revistaseletronicas.pucrs.br/ojs/index.php/iberoamericana/about/editorialPolicies#openAccessPolicy	Yes	http://revistaseletronicas.pucrs.br/ojs/index.php/iberoamericana/article/view/14023/12461	CC BY		http://revistaseletronicas.pucrs.br/ojs/index.php/iberoamericana/index	Yes	Sherpa/Romeo, Diadorim	True
Estudos Econômicos	http://www.scielo.br/scielo.php/script_sci_serial/pid_0101-4161/lng_en/nrm_iso		0101-4161	1980-5357	Universidade de São Paulo	Instituto de Pesquisas Econômicas da FEA-USP	SciELO Brazil	Brazil	No	http://www.scielo.br/revistas/ee/iinstruc.htm#001				http://www.scielo.br/revistas/ee/iinstruc.htm#001											Yes	DOI			2003	PDF, HTML, XML	economics	English, Portuguese	http://www.scielo.br/revistas/ee/iedboard.htm	Double blind peer review	http://www.scielo.br/revistas/ee/iinstruc.htm	http://www.scielo.br/revistas/ee/iaboutj.htm	http://www.scielo.br/revistas/ee/iinstruc.htm			41	http://www.scielo.br/revistas/ee/isubscrp.htm	Yes	http://www.scielo.br/scielo.php?script=sci_arttext&pid=S0101-41612015000200347&lng=en&nrm=iso&tlng=pt	CC BY-NC		http://www.scielo.br/revistas/ee/iaboutj.htm	Yes		False
Educação	http://revistaseletronicas.pucrs.br/faced/ojs/index.php/faced		0101-465X	1981-2582	Editora da Pontifícia Universidade Católica do Rio Grande do Sul - EDIPUCRS	Pontifícia Universidade Católica do Rio Grande do Sul	OJS	Brazil	No	http://revistaseletronicas.pucrs.br/ojs/index.php/faced/about/editorialPolicies#custom-7				http://revistaseletronicas.pucrs.br/ojs/index.php/faced/about/editorialPolicies#custom-7								Biblioteca Nacional do Brasil		http://revistaseletronicas.pucrs.br/faced/ojs/index.php/faced/about/editorialPolicies#archiving	Yes	DOI			2004	PDF	pedagogy	Portuguese, Spanish; Castilian	http://revistaseletronicas.pucrs.br/faced/ojs/index.php/faced/about/displayMembership/84	Double blind peer review	http://revistaseletronicas.pucrs.br/faced/ojs/index.php/faced/about/submissions#authorGuidelines	http://revistaseletronicas.pucrs.br/faced/ojs/index.php/faced/about/editorialPolicies#focusAndScope	http://revistaseletronicas.pucrs.br/faced/ojs/index.php/faced/about/submissions#authorGuidelines			10	http://revistaseletronicas.pucrs.br/faced/ojs/index.php/faced/about/editorialPolicies#openAccessPolicy	Yes	http://revistaseletronicas.pucrs.br/faced/ojs/index.php/faced/article/view/18082/12443	CC BY		http://revistaseletronicas.pucrs.br/faced/ojs/index.php/faced/index	Yes	Sherpa/Romeo, Diadorim	False
Anais do Museu Paulista: História e Cultura Material	http://www.scielo.br/scielo.php?script=sci_serial&pid=0101-4714&lng=en&nrm=iso		0101-4714	1982-0267	Universidade de São Paulo, Museu Paulista	Universidade de São Paulo (USP)	SciELO Brazil	Brazil	No	http://www.scielo.br/revistas/anaismp/iinstruc.htm#03				http://www.scielo.br/revistas/anaismp/iinstruc.htm#03										http://www.scielo.br/revistas/anaismp/iedboard.htm	Yes	DOI	Yes	http://www.scielo.br/statjournal.php?lang=en&issn=0101-4714	1993	PDF, HTML, XML	history, material culture	English, French, Italian, Portuguese, Spanish; Castilian	http://www.scielo.br/revistas/anaismp/iedboard.htm	Peer review	http://www.scielo.br/revistas/anaismp/iinstruc.htm	http://www.scielo.br/revistas/anaismp/iedboard.htm	http://www.scielo.br/revistas/anaismp/iinstruc.htm			18	http://www.scielo.br/revistas/anaismp/isubscrp.htm	Yes	http://www.scielo.br/scielo.php?script=sci_arttext&pid=S0101-47142015000100011&lng=en&nrm=iso&tlng=pt	CC BY		http://www.scielo.br/revistas/anaismp/iaboutj.htm	Yes		False
Ilha do Desterro	http://www.periodicos.ufsc.br/index.php/desterro	A Journal of English Language, Literatures in English and Cultural Studies	0101-4846	2175-8026	Universidade Federal de Santa Catarina		OJS	Brazil	No	https://periodicos.ufsc.br/index.php/desterro/about/submissions				https://periodicos.ufsc.br/index.php/desterro/about/submissions							LOCKSS			https://thekeepers.org/purl/issn/0101-4846	Yes	DOI			1979	PDF	English language, literature, cultural studies	English, Portuguese	https://periodicos.ufsc.br/index.php/desterro/about/editorialTeam	Double blind peer review	https://periodicos.ufsc.br/index.php/desterro/about/editorialPolicies#peerReviewProcess	https://periodicos.ufsc.br/index.php/desterro/about/editorialPolicies#focusAndScope	https://periodicos.ufsc.br/index.php/desterro/about/submissions#authorGuidelines			16	https://periodicos.ufsc.br/index.php/desterro/about/editorialPolicies#openAccessPolicy			CC BY		https://periodicos.ufsc.br/index.php/desterro/index	Yes	Sherpa/Romeo, Diadorim	True
Archives of Clinical Psychiatry	http://www.archivespsy.com/		0101-6083	1806-938X	Universidade de São Paulo	Universidade de São Paulo, Faculdade de Medicina		Brazil	No	http://www.archivespsy.com/about-acp/				http://www.archivespsy.com/about-acp/											Yes	DOI		http://www.scielo.br/statjournal.php?lang=es&issn=0101-6083	2002	PDF, HTML, XML	human sciences, psychiatry, clinic, neuroscience	English	http://www.archivespsy.com/editorial-board/	Peer review	http://www.archivespsy.com/submit-a-paper/	http://www.archivespsy.com/about-acp/	http://www.archivespsy.com/submit-a-paper/		http://www.scielo.br/revistas/rpc/iinstruc.htm	25	http://www.archivespsy.com/about-acp/		http://www.archivespsy.com/about-acp/	CC BY-NC		http://www.archivespsy.com/about-acp/	Yes		False
Serviço Social & Sociedade	http://www.scielo.br/scielo.php?script=sci_serial&pid=0101-6628&lng=en&nrm=iso		0101-6628		Cortez Editora Ltda		SciELO Brazil	Brazil	No	http://www.scielo.br/revistas/sssoc/iinstruc.htm#03				http://www.scielo.br/revistas/sssoc/iinstruc.htm#03										http://www.scielo.br/revistas/sssoc/iinstruc.htm	Yes				2010	PDF, HTML, XML	political science, social work, public policies, public health	English, Portuguese	http://www.scielo.br/revistas/sssoc/iedboard.htm	Peer review	http://www.scielo.br/revistas/sssoc/iinstruc.htm#02	http://www.scielo.br/revistas/sssoc/iinstruc.htm	http://www.scielo.br/revistas/sssoc/iinstruc.htm			14	http://www.scielo.br/revistas/sssoc/isubscrp.htm	Yes	http://www.scielo.br/scielo.php?script=sci_arttext&pid=S0101-66282015000300428&lng=en&nrm=iso&tlng=pt	CC BY-NC		http://www.scielo.br/scielo.php?script=sci_serial&pid=0101-6628&lng=en&nrm=iso	Yes		False
Revista Águas Subterrâneas	https://aguassubterraneas.abas.org/asubterraneas/index	Águas Subterrâneas	0101-7004	2179-9784	Associação Brasileira de Águas Subterrâneas	Associação Brasileira de Águas Subterrâneas	OJS	Brazil	No	https://aguassubterraneas.abas.org/asubterraneas/index				https://aguassubterraneas.abas.org/asubterraneas/index											Yes				1980	PDF	groundwater, hydrology	English, Portuguese	https://aguassubterraneas.abas.org/asubterraneas/about/editorialTeam	Double blind peer review	https://aguassubterraneas.abas.org/asubterraneas/about/editorialPolicies#peerReviewProcess	https://aguassubterraneas.abas.org/asubterraneas/about/editorialPolicies#focusAndScope	https://aguassubterraneas.abas.org/asubterraneas/about/submissions#authorGuidelines			20	https://aguassubterraneas.abas.org/asubterraneas/about/editorialPolicies#openAccessPolicy	Yes	https://aguassubterraneas.abas.org/asubterraneas/article/view/28497	CC BY		https://aguassubterraneas.abas.org/asubterraneas/about/submissions#copyrightNotice	Yes		True
Boletim Goiano de Geografia	http://revistas.ufg.br/index.php/bgg		0101-708X	1984-8501	Universidade Federal de Goiás		OJS	Brazil	No	https://www.revistas.ufg.br/bgg/about/editorialPolicies#custom-11				https://www.revistas.ufg.br/bgg/about/editorialPolicies#custom-11												DOI			1981	PDF	physical geography, geotechnology, human geography, regional development	English, Portuguese	http://www.revistas.ufg.br/index.php/bgg/about/editorialTeam	Blind peer review	http://www.revistas.ufg.br/bgg/about/editorialPolicies#peerReviewProcess	http://www.revistas.ufg.br/bgg/about/editorialPolicies#focusAndScope	http://www.revistas.ufg.br/bgg/about/submissions#authorGuidelines	Yes	http://www.revistas.ufg.br/index.php/bgg/about/editorialPolicies#custom-1	6	http://www.revistas.ufg.br/index.php/bgg/about/editorialPolicies#openAccessPolicy			CC BY		https://www.revistas.ufg.br/bgg/index	Yes		False
Inter-Ação	http://www.revistas.ufg.br/index.php/interacao		0101-7136	1981-8416	Universidade Federal de Goiás	Universidade Federal de Goiás, Faculdade de Educação	OJS	Brazil	No	http://revistas.ufg.emnuvens.com.br/interacao/about/submissions#authorGuidelines				http://revistas.ufg.emnuvens.com.br/interacao/about/submissions#authorGuidelines									Cariniana Network	http://www.revistas.ufg.br/index.php/interacao/about/editorialPolicies#archiving	Yes	DOI			2007	PDF	social movements, education history, education policies, culture and educational processes, educational practices	English, Portuguese, Spanish; Castilian	http://www.revistas.ufg.br/index.php/interacao/about/editorialTeam	Double blind peer review	http://revistas.ufg.emnuvens.com.br/interacao/about/editorialPolicies#peerReviewProcess	http://revistas.ufg.emnuvens.com.br/interacao/about/editorialPolicies#focusAndScope	http://www.revistas.ufg.br/index.php/interacao/about/submissions#authorGuidelines			12	http://revistas.ufg.emnuvens.com.br/interacao/about/editorialPolicies#openAccessPolicy	Yes	http://revistas.ufg.emnuvens.com.br/interacao/article/view/35869	CC BY-NC		http://revistas.ufg.emnuvens.com.br/interacao/about/submissions#copyrightNotice	Yes	Diadorim	True
Revista da Faculdade de Direito da UFG	http://www.revistas.ufg.br/index.php/revfd/index		0101-7187		Universidade Federal de Goiás			Brazil	No	https://revistas.ufg.br/index.php?journal=revfd&page=about&op=editorialPolicies#openAccessPolicy				https://revistas.ufg.br/index.php?journal=revfd&page=about&op=editorialPolicies#openAccessPolicy										http://www.revistas.ufg.br/index.php/revfd/about/editorialPolicies#archiving	Yes				1987	PDF	agrarian law, law, law school	Portuguese	https://www.revistas.ufg.br/index.php?journal=revfd&page=about&op=editorialTeam	Double blind peer review	https://www.revistas.ufg.br/index.php?journal=revfd&page=about&op=editorialPolicies#peerReviewProcess	https://www.revistas.ufg.br/index.php?journal=revfd&page=about&op=editorialPolicies#focusAndScope	https://www.revistas.ufg.br/index.php?journal=revfd&page=about&op=submissions#authorGuidelines			16	https://www.revistas.ufg.br/index.php?journal=revfd&page=about&op=editorialPolicies#openAccessPolicy			CC BY		https://www.revistas.ufg.br/index.php?journal=revfd&page=about&op=submissions#copyrightNotice	Yes		False
Educação & Sociedade	http://www.scielo.br/scielo.php/script_sci_serial/pid_0101-7330/lng_en/nrm_iso		0101-7330	1678-4626	Centro de Estudos Educação e Sociedade (CEDES)		SciELO Brazil	Brazil	No	http://www.scielo.br/revistas/es/iinstruc.htm#005				http://www.scielo.br/revistas/es/iinstruc.htm#005											Yes	DOI			1997	PDF, HTML, XML	society, education	English, French, Portuguese, Spanish; Castilian	http://www.scielo.br/revistas/es/iedboard.htm	Double blind peer review	http://www.scielo.br/revistas/es/iinstruc.htm	http://www.scielo.br/revistas/es/iaboutj.htm	http://www.scielo.br/revistas/es/iinstruc.htm			12	http://www.scielo.br/revistas/es/iaboutj.htm#03	Yes	http://www.scielo.br/scielo.php?script=sci_arttext&pid=S0101-73302015000100063&lng=en&nrm=iso&tlng=pt	CC BY-NC		http://www.scielo.br/revistas/es/iaboutj.htm	Yes		False
Pesquisa Operacional	http://www.scielo.br/scielo.php/script_sci_serial/pid_0101-7438/lng_en/nrm_iso		0101-7438	1678-5142	Sociedade Brasileira de Pesquisa Operacional	Sociedade Brasileira de Pesquisa Operacional	SciELO Brazil	Brazil	No	http://www.scielo.br/revistas/pope/iinstruc.htm				http://www.scielo.br/revistas/pope/iinstruc.htm											Yes	DOI	Yes	http://www.scielo.br/statjournal.php?lang=en&issn=0101-7438	2000	PDF, HTML, XML	engineering	English	http://www.scielo.br/revistas/pope/iedboard.htm	Blind peer review	http://www.scielo.br/revistas/pope/iinstruc.htm	http://www.scielo.br/revistas/pope/iinstruc.htm	http://www.scielo.br/revistas/pope/iinstruc.htm			8	http://www.scielo.br/revistas/pope/isubscrp.htm	Yes	http://www.scielo.br/scielo.php?script=sci_arttext&pid=S0101-74382014000300421&lng=en&nrm=iso&tlng=en	CC BY		http://www.scielo.br/scielo.php/script_sci_serial/pid_0101-7438/lng_en/nrm_iso	Yes		False
Boletim Gaùcho de Geografia	http://seer.ufrgs.br/bgg	BGG	0101-7888	2357-9447	Associação dos Geógrafos Brasileiros, Seção de Porto Alegre	Associação dos Geógrafos Brasileiros, Seção de Porto Alegre	OJS	Brazil	No	http://seer.ufrgs.br/index.php/bgg/about/editorialPolicies#focusAndScope				http://seer.ufrgs.br/index.php/bgg/about/editorialPolicies#focusAndScope										http://seer.ufrgs.br/index.php/bgg/about/editorialPolicies#archiving	Yes				2012	PDF	place, region, environment, urban space, territory, geography	Portuguese, Spanish; Castilian	http://seer.ufrgs.br/index.php/bgg/about/editorialTeam	Double blind peer review	http://seer.ufrgs.br/index.php/bgg/about/editorialPolicies#peerReviewProcess	http://seer.ufrgs.br/index.php/bgg/about/editorialPolicies#focusAndScope	http://seer.ufrgs.br/index.php/bgg/about/submissions#authorGuidelines		http://seer.ufrgs.br/index.php/bgg/about/editorialPolicies#focusAndScope	40	http://seer.ufrgs.br/index.php/bgg/about/editorialPolicies#openAccessPolicy			CC BY		http://seer.ufrgs.br/index.php/bgg/about/submissions#copyrightNotice	Yes	Diadorim	True
Revista de Letras	http://www.periodicos.ufc.br/index.php/revletras/		0101-8051	2358-4793	Universidade Federal do Ceará	Universidade Federal do Ceará, Departamento de Letras Vernáculas e de Literatura Estrangeira	OJS	Brazil	No	http://periodicos.ufc.br/index.php/revletras/about/submissions#authorGuidelines				http://periodicos.ufc.br/index.php/revletras/about/submissions#authorGuidelines										http://www.periodicos.ufc.br/index.php/index/about	Yes				1978	PDF	literature, linguistics, translation, applied linguistics	Spanish; Castilian	http://www.periodicos.ufc.br/index.php/revletras/article/view/4232/3265	Double blind peer review	http://www.periodicos.ufc.br/index.php/revletras/about/editorialPolicies#peerReviewProcess	http://www.periodicos.ufc.br/index.php/revletras/index	http://www.periodicos.ufc.br/index.php/revletras/about/submissions#onlineSubmissions			20	http://www.periodicos.ufc.br/index.php/revletras/about/editorialPolicies#openAccessPolicy	Yes	http://www.periodicos.ufc.br/index.php/revletras/article/view/3036	CC BY		http://www.periodicos.ufc.br/index.php/revletras/index	Yes		True
Revista de Psiquiatria do Rio Grande do Sul	http://www.scielo.br/rprs		0101-8108		Sociedade de Psiquiatria do Rio Grande do Sul		SciELO Brazil	Brazil	No Information																				2003		human sciences													CC BY-NC
Revista Brasileira de Zoologia	http://www.scielo.br/scielo.php/script_sci_serial/pid_0101-8175/lng_pt/nrm_iso		0101-8175		Sociedade Brasileira de Zoologia		SciELO Brazil	Brazil	No Information																				1982		biological sciences													CC BY-NC
Educação (UFSM)	http://periodicos.ufsm.br/index.php/reveducacao	Educação (UFSM)	0101-9031	1984-6444	Universidade Federal de Santa Maria		OJS	Brazil	No	https://periodicos.ufsm.br/reveducacao/about/submissions#authorGuidelines				https://periodicos.ufsm.br/reveducacao/about/submissions#authorGuidelines							LOCKSS			https://thekeepers.org/purl/issn/0101-9031		DOI			2000	PDF	education, teaching and learning	Portuguese, Spanish; Castilian	http://cascavel.ufsm.br/revistas/ojs-2.2.2/index.php/reveducacao/about	Blind peer review	http://cascavel.ufsm.br/revistas/ojs-2.2.2/index.php/reveducacao/about/editorialPolicies#peerReviewProcess	http://cascavel.ufsm.br/revistas/ojs-2.2.2/index.php/reveducacao/about/editorialPolicies#focusAndScope	https://periodicos.ufsm.br/reveducacao/about/submissions#authorGuidelines			10	https://periodicos.ufsm.br/reveducacao/about/editorialPolicies#openAccessPolicy	Yes	http://ufsm.br/revistaeducacao	CC BY-NC		https://periodicos.ufsm.br/index.php/reveducacao/about/submissions#copyrightNotice	Yes	Diadorim	False
História	http://www.scielo.br/scielo.php?script=sci_serial&pid=0101-9074&lng=en&nrm=iso		0101-9074	1980-4369	Universidade Estadual Paulista Julio de Mesquita Filho		SciELO Brazil	Brazil	No	http://www.scielo.br/revistas/his/iinstruc.htm#001				http://www.scielo.br/revistas/his/iinstruc.htm#001											Yes	DOI	Yes	http://www.scielo.br/statjournal.php?lang=en&issn=0101-9074	2003	PDF, HTML	modern history	English, Portuguese, Spanish; Castilian	http://www.scielo.br/revistas/his/iedboard.htm	Peer review	http://www.scielo.br/revistas/his/iinstruc.htm	http://www.scielo.br/revistas/his/iinstruc.htm	http://www.scielo.br/revistas/his/iinstruc.htm			8	http://www.scielo.br/revistas/his/isubscrp.htm	Yes	http://www.scielo.br/scielo.php?script=sci_arttext&pid=S0101-90742014000200057&lng=en&nrm=iso&tlng=pt	CC BY-NC		http://www.scielo.br/scielo.php?script=sci_serial&pid=0101-9074&lng=en&nrm=iso	Yes		False
Sequência: Estudos Juridicos e Politicos	http://periodicos.ufsc.br/index.php/sequencia	Seqüência	0101-9562	2177-7055	Universidade Federal de Santa Catarina	Universidade Federal de Santa Catarina	OJS	Brazil	No	https://periodicos.ufsc.br/index.php/sequencia/about/submissions#authorGuidelines				https://periodicos.ufsc.br/index.php/sequencia/about/submissions#authorGuidelines										https://periodicos.ufsc.br/index.php/sequencia/about/editorialPolicies#archiving	Yes	DOI		https://periodicos.ufsc.br/index.php/sequencia/about/editorialPolicies#custom-2	1980	PDF	law, critical theory of law, history of law, state and society, political science, international relations	English, German, Portuguese, Spanish; Castilian	https://periodicos.ufsc.br/index.php/sequencia/about/editorialTeam	Double blind peer review	https://periodicos.ufsc.br/index.php/sequencia/about/editorialPolicies#peerReviewProcess	https://periodicos.ufsc.br/index.php/sequencia/about/editorialPolicies#focusAndScope	https://periodicos.ufsc.br/index.php/sequencia/about/submissions#authorGuidelines			16	https://periodicos.ufsc.br/index.php/sequencia/about/editorialPolicies#openAccessPolicy		https://periodicos.ufsc.br/index.php/sequencia/about/submissions#privacyStatement	CC BY		https://periodicos.ufsc.br/index.php/sequencia/about/submissions#copyrightNotice	Yes		False
Anuário do Instituto de Geociências	http://www.anuario.igeo.ufrj.br	Anuário Igeo	0101-9759	1982-3908	Universidade Federal do Rio de Janeiro	Universidade Federal do Rio de Janeiro		Brazil	No	http://www.anuario.igeo.ufrj.br/ingles/normas_ingles.pdf				http://www.anuario.igeo.ufrj.br/ingles/normas_ingles.pdf										http://ppegeo.igc.usp.br/scielo.php?script=sci_alphabetic&lng=pt&nrm=iso	Yes				1977	PDF, HTML	geology, palaeontology, geography, meteorology, climate	English, French, Portuguese, Spanish; Castilian	http://www.anuario.igeo.ufrj.br/ingles/editorial.htm	Peer review	http://www.anuario.igeo.ufrj.br/ingles/normas_ingles.pdf	http://www.anuario.igeo.ufrj.br/ingles/history.htm	http://www.anuario.igeo.ufrj.br/ingles/normas_ingles.pdf			28	http://www.anuario.igeo.ufrj.br/ingles/history.htm			CC BY		http://www.anuario.igeo.ufrj.br/ingles/issues.htm	Yes		True
Revista Brasilera de Coloproctologia	http://www.scielo.br/scielo.php/script_sci_serial/pid_0101-9880/lng_en/nrm_iso		0101-9880		Cidade Editora Científica Ltda		SciELO Brazil	Brazil	No Information																				2006		coloproctology, surgery, gastroenterology													CC BY-NC
Revista Brasileira de História	http://www.scielo.br/scielo.php/script_sci_serial/pid_0102-0188/lng_pt/nrm_iso	RBH	0102-0188	1806-9347	Associação Nacional de História (ANPUH)		SciELO Brazil	Brazil	No	http://www.scielo.br/revistas/rbh/iinstruc.htm#001				http://www.scielo.br/revistas/rbh/iinstruc.htm#001															1997	PDF, HTML, XML	history	English, Portuguese, Spanish; Castilian	http://www.scielo.br/revistas/rbh/iedboard.htm	Peer review	http://www.scielo.br/revistas/rbh/iinstruc.htm	http://www.scielo.br/revistas/rbh/iinstruc.htm	http://www.scielo.br/revistas/rbh/iinstruc.htm			13	http://www.scielo.br/revistas/rbh/isubscrp.htm	Yes	http://www.scielo.br/scielo.php?script=sci_arttext&pid=S0102-01882015000100013&lng=pt&nrm=iso&tlng=pt	CC BY		http://www.scielo.br/revistas/rbh/isubscrp.htm			False
Revista de Arqueologia	http://www.revista.sabnet.com.br	Revista de Arqueologia da SAB	0102-0420	1982-1999	Sociedade de Arqueologia Brasileira	Sociedade de Arqueologia Brasileira	OJS	Brazil	No	http://revista.sabnet.com.br/revista/index.php/SAB/about				http://www.revista.sabnet.com.br/revista/index.php/SAB/about									Cariniana Network	https://thekeepers.org/purl/issn/0102-0420	Yes	DOI			1983	PDF	archeology, heritage, Brazil, history	Portuguese	http://www.revista.sabnet.com.br/revista/index.php/SAB/about/editorialTeam	Double blind peer review	http://www.revista.sabnet.com.br/revista/index.php/SAB/about	http://www.revista.sabnet.com.br/revista/index.php/SAB/about	http://www.revista.sabnet.com.br/revista/index.php/SAB/about/submissions	Yes	http://revista.sabnet.com.br/revista/index.php/SAB/about	24	http://www.revista.sabnet.com.br/revista/index.php/SAB/about			CC BY-SA		http://www.revista.sabnet.com.br/revista/index.php/SAB/about	Yes	Diadorim	True
Horticultura Brasileira	http://www.scielo.br/scielo.php/script_sci_serial/pid_0102-0536/lng_en/nrm_iso		0102-0536		Associação Brasileira de Olericultura		SciELO Brazil	Brazil	Yes	http://www.scielo.br/revistas/hb/iinstruc.htm	205	USD - US Dollar		http://www.scielo.br/revistas/hb/iinstruc.htm											Yes	DOI	Yes	http://www.scielo.br/statjournal.php?lang=en&issn=0102-0536	1999	PDF, HTML, XML	agricultural sciences, biological sciences, horticulture	English, Portuguese, Spanish; Castilian	http://www.scielo.br/revistas/hb/iedboard.htm	Peer review	http://www.scielo.br/revistas/hb/iinstruc.htm	http://www.scielo.br/revistas/hb/iinstruc.htm	http://www.scielo.br/revistas/hb/iinstruc.htm			40	http://www.scielo.br/revistas/hb/isubscrp.htm	Yes	http://www.scielo.br/scielo.php?script=sci_arttext&pid=S0102-05362015000200004&lng=en&nrm=iso&tlng=en	CC BY		http://www.scielo.br/revistas/hb/isubscrp.htm	Yes		False
Revista Brasileira de Biometria	http://www.biometria.ufla.br	Biometric Brazilian Journal	0102-0811	1983-0823	Universidade Federal de Lavras		OJS	Brazil	No	http://www.biometria.ufla.br/index.php/BBJ/about				http://www.biometria.ufla.br/index.php/BBJ/about										http://www.biometria.ufla.br/ojs/index.php/BBJ/about/editorialPolicies#focusAndScope	Yes				2007	PDF	Biometry, Statistical Methods, Data Analysis	English, Portuguese	http://www.biometria.ufla.br/index.php/BBJ/about/editorialTeam	Double blind peer review	http://www.biometria.ufla.br/index.php/BBJ/about/submissions	http://www.biometria.ufla.br/index.php/BBJ/about	http://www.biometria.ufla.br/index.php/BBJ/about/submissions			53	http://www.biometria.ufla.br/index.php/BBJ/about			CC BY		http://www.biometria.ufla.br/index.php/BBJ/about/submissions	Yes		True
Arquivo Brasileiro de Medicina Veterinária e Zootecnia	http://www.scielo.br/scielo.php?script=sci_serial&pid=0102-0935&lng=en&nrm=iso	Brazilian Journal of Veterinary and Animal Sciences	0102-0935	1678-4162	Universidade Federal de Minas Gerais	Universidade Federal de Minas Gerais, Escola de Veterinária	SciELO Brazil	Brazil	Yes	http://www.scielo.br/revistas/abmvz/iinstruc.htm	800	USD - US Dollar	Yes	http://www.scielo.br/revistas/abmvz/iinstruc.htm#008	50	USD - US Dollar								http://www.scielo.br/revistas/abmvz/iinstruc.htm	Yes	DOI	Yes	http://www.scielo.br/statjournal.php?lang=en&issn=0102-0935	1999	PDF, HTML, XML	agricultural sciences, veterinary medicine, animal science	English, Portuguese	http://www.scielo.br/revistas/abmvz/iedboard.htm	Editorial review	http://www.scielo.br/revistas/abmvz/iinstruc.htm#003	http://www.scielo.br/revistas/abmvz/iaboutj.htm	http://www.scielo.br/revistas/abmvz/iinstruc.htm		http://www.scielo.br/revistas/abmvz/iinstruc.htm	26	http://www.scielo.br/revistas/abmvz/isubscrp.htm	Yes	http://www.scielo.br/scielo.php?script=sci_arttext&pid=S0102-09352015000400984&lng=pt&nrm=iso&tlng=pt	CC BY		http://www.scielo.br/revistas/abmvz/isubscrp.htm	Yes		False
Revista Educação em Debate	http://www.periodicosfaced.ufc.br/index.php/educacaoemdebate/index	Educação em Debate (EemD)	0102-1117	2526-0847	Universidade Federal do Ceará	Universidade Federal do Ceará	OJS	Brazil	No	http://www.periodicosfaced.ufc.br/index.php/educacaoemdebate/index				http://www.periodicosfaced.ufc.br/index.php/educacaoemdebate/index											Yes				1999	PDF	education, theory of education, practice in education	Portuguese, Spanish; Castilian	http://www.periodicosfaced.ufc.br/index.php/educacaoemdebate/about/editorialTeam	Blind peer review	http://www.periodicosfaced.ufc.br/index.php/educacaoemdebate/help/view/editorial/topic/000044	http://www.periodicosfaced.ufc.br/index.php/educacaoemdebate/about/editorialPolicies#focusAndScope	http://www.periodicosfaced.ufc.br/index.php/educacaoemdebate/about/submissions#authorGuidelines	Yes	http://www.periodicosfaced.ufc.br/index.php/educacaoemdebate/about/submissions#authorGuidelines	12	http://www.periodicosfaced.ufc.br/index.php/educacaoemdebate/about/editorialPolicies#openAccessPolicy			CC BY-NC-ND		http://www.periodicosfaced.ufc.br/index.php/educacaoemdebate/about/submissions#copyrightNotice	Yes	Diadorim	True
Revista de Psicologia	http://www.periodicos.ufc.br/index.php/psicologiaufc		0102-1222	2179-1740	Universidade Federal do Ceará	Universidade Federal do Ceará, Departamento de Psicologia	OJS	Brazil	No	http://www.periodicos.ufc.br/psicologiaufc/about/editorialPolicies#openAccessPolicy				http://www.periodicos.ufc.br/psicologiaufc/about/editorialPolicies#openAccessPolicy										http://www.periodicos.ufc.br/index.php/psicologiaufc/about/editorialPolicies#archiving	Yes				2010	PDF	mental health, social sciences, psychology	English, Portuguese	http://www.periodicos.ufc.br/index.php/psicologiaufc/about/editorialTeam	Blind peer review	http://www.periodicos.ufc.br/index.php/psicologiaufc/about/editorialPolicies#peerReviewProcess	http://www.periodicos.ufc.br/index.php/psicologiaufc/about/editorialPolicies#focusAndScope	http://www.periodicos.ufc.br/index.php/psicologiaufc/about/editorialPolicies#custom-1			16	http://www.periodicos.ufc.br/index.php/psicologiaufc/about/editorialPolicies#openAccessPolicy			CC BY-NC		http://www.periodicos.ufc.br/psicologiaufc/index	Yes		False
Revista de Homeopatia	http://www.aph.org.br/revista/index.php/aph/index		0102-227X	2175-3105	Associação Paulista de Homeopatia		OJS	Brazil	No	http://aph.org.br/revista/index.php/aph/about/editorialPolicies#openAccessPolicy				http://aph.org.br/revista/index.php/aph/about/editorialPolicies#openAccessPolicy										http://www.aph.org.br/revista/index.php/aph/about/editorialPolicies#archiving	Yes				2009	PDF	alternative medicine, homeopathy	English, Portuguese	http://www.aph.org.br/revista/index.php/aph/about/editorialTeam	Peer review	http://www.aph.org.br/revista/index.php/aph/about/editorialPolicies#peerReviewProcess	http://www.aph.org.br/revista/index.php/aph/about/editorialPolicies#focusAndScope	http://www.aph.org.br/revista/index.php/aph/about/submissions#onlineSubmissions			24	http://aph.org.br/revista/index.php/aph/about/editorialPolicies#openAccessPolicy	Yes	http://aph.org.br/revista/index.php/aph/article/view/357	CC BY		http://aph.org.br/revista/index.php/aph/about/submissions#copyrightNotice	Yes	Diadorim	True
Revista da Faculdade de Educação	http://www.scielo.br/rfe		0102-2555		Universidade de São Paulo		SciELO Brazil	Brazil	No Information																				1997		human sciences	PORTUGUESE
Revista Brasileira de Estudos de População	http://www.scielo.br/scielo.php/script_sci_serial/pid_0102-3098/lng_en/nrm_iso		0102-3098		Associação Brasileira de Estudos Populacionais		SciELO Brazil	Brazil	No	http://www.scielo.br/revistas/rbepop/iinstruc.htm				http://www.scielo.br/revistas/rbepop/iinstruc.htm										http://www.scielo.br/revistas/rbepop/iinstruc.htm	Yes				2005	PDF, HTML, XML	demography, population studies	English, Portuguese, Spanish; Castilian	http://www.scielo.br/revistas/rbepop/iedboard.htm	Double blind peer review	http://www.scielo.br/revistas/rbepop/iinstruc.htm	http://www.scielo.br/scielo.php/script_sci_serial/pid_0102-3098/lng_en/nrm_iso	http://www.scielo.br/revistas/rbepop/iinstruc.htm	Yes	http://www.scielo.br/revistas/rbepop/iinstruc.htm	13	http://www.scielo.br/revistas/rbepop/isubscrp.htm	Yes	http://www.scielo.br/scielo.php?script=sci_arttext&pid=S0102-30982015000100049&lng=en&nrm=iso&tlng=es	CC BY-NC		http://www.scielo.br/revistas/rbepop/iaboutj.htm	Yes		False
Cadernos de Saúde Pública	http://www.scielo.br/scielo.php?script=sci_serial&pid=0102-311X&lng=en&nrm=iso	CSP	0102-311X	1678-4464	Escola Nacional de Saúde Pública, Fundação Oswaldo Cruz		SciELO Brazil	Brazil	No	http://www.scielo.br/revistas/csp/iinstruc.htm				http://www.scielo.br/revistas/csp/iinstruc.htm											Yes	DOI			1999	PDF, HTML, XML	biological sciences, health sciences	English, Portuguese, Spanish; Castilian	http://www.scielo.br/revistas/csp/iedboard.htm	Peer review	http://www.scielo.br/revistas/csp/iinstruc.htm	http://www.scielo.br/revistas/csp/iaboutj.htm	http://www.scielo.br/revistas/csp/iinstruc.htm			17	http://www.scielo.br/revistas/csp/isubscrp.htm		http://www.scielo.br/revistas/csp/iaboutj.htm	CC BY		http://www.scielo.br/revistas/csp/iaboutj.htm	Yes	Sherpa/Romeo	True
Acta Botânica Brasílica	http://www.scielo.br/scielo.php/script_sci_serial/lng_pt/pid_0102-3306/nrm_iso		0102-3306	1677-941X	Sociedade Botânica do Brasil	Sociedade Botânica do Brasil, SBB	SciELO Brazil	Brazil	No	http://www.scielo.br/revistas/abb/iinstruc.htm#001				http://www.scielo.br/revistas/abb/iinstruc.htm#001										http://www.scielo.br/revistas/abb/iinstruc.htm	Yes	DOI			1987	PDF, HTML, XML	biological sciences, floristics, biology	English	http://www.scielo.br/revistas/abb/iedboard.htm	Peer review	http://www.scielo.br/revistas/abb/iinstruc.htm	http://www.scielo.br/revistas/abb/iaboutj.htm	http://www.scielo.br/revistas/abb/iinstruc.htm			18	http://www.scielo.br/revistas/abb/iinstruc.htm	Yes	http://www.scielo.br/scielo.php?script=sci_arttext&pid=S0102-33062015000200190&lng=en&nrm=iso&tlng=en	CC BY-NC		http://www.scielo.br/revistas/abb/iaboutj.htm	Yes		False
Jornal de Pneumologia	http://www.scielo.br/scielo.php/script_sci_serial/pid_0102-3586/lng_en/nrm_iso		0102-3586	1678-4642	Sociedade Brasileira de Pneumologia e Tisiologia		SciELO Brazil	Brazil	No Information																				1999		health sciences	PORTUGUESE
Revista Brasileira de Ortopedia	http://www.scielo.br/scielo.php?script=sci_serial&pid=0102-3616&lng=en&nrm=iso		0102-3616	1982-4378	Sociedade Brasileira de Ortopedia e Traumatologia	Elsevier Editora Ltda	SciELO Brazil	Brazil	No	http://www.scielo.br/revistas/rbort/iaboutj.htm				http://www.scielo.br/revistas/rbort/iaboutj.htm											Yes	DOI	Yes	http://www.scielo.br/applications/scielo-org/pages/services/articleRequestGraphicPage.php?pid=S0102-36162015000200232&caller=www.scielo.br&lang=pt	2007	PDF, HTML, XML	orthopedics	English, Portuguese, Spanish; Castilian	http://www.scielo.br/revistas/rbort/iedboard.htm	Blind peer review	http://www.scielo.br/revistas/rbort/iinstruc.htm	http://www.scielo.br/revistas/rbort/iinstruc.htm	http://www.scielo.br/revistas/rbort/iinstruc.htm		http://www.scielo.br/revistas/rbort/iinstruc.htm	21	http://www.scielo.br/revistas/rbort/isubscrp.htm	Yes	http://www.scielo.br/scielo.php?script=sci_arttext&pid=S0102-36162015000500509&lng=en&nrm=iso&tlng=pt	CC BY-NC-ND		http://www.scielo.br/revistas/rbort/iaboutj.htm	Yes		False
Psicologia: Teoria e Pesquisa	http://www.scielo.br/scielo.php/script_sci_serial/pid_0102-3772/lng_en/nrm_iso		0102-3772	1806-3446	Universidade de Brasília		SciELO Brazil	Brazil	No	http://www.scielo.br/revistas/ptp/iinstruc.htm				http://www.scielo.br/revistas/ptp/iinstruc.htm											Yes	DOI	Yes	http://www.scielo.br/statjournal.php?lang=en&issn=0102-3772	2000	PDF, HTML	human sciences	English, Portuguese, Spanish; Castilian	http://www.scielo.br/revistas/ptp/iedboard.htm	Peer review	http://www.scielo.br/revistas/ptp/iinstruc.htm	http://www.scielo.br/revistas/ptp/iinstruc.htm	http://www.scielo.br/revistas/ptp/iinstruc.htm	Yes	http://www.scielo.br/revistas/ptp/iinstruc.htm	48	http://www.scielo.br/revistas/ptp/isubscrp.htm	Yes	http://www.scielo.br/scielo.php?script=sci_arttext&pid=S0102-37722014000400003&lng=en&nrm=iso&tlng=pt	CC BY-NC		http://www.scielo.br/scielo.php/script_sci_serial/pid_0102-3772/lng_en/nrm_iso	Yes		True
BIBLOS : Revista do Instituto de Ciências Humanas e da Informação	https://www.seer.furg.br/biblos/index	BIBLOS : Revista do Instituto de Ciencias Humanas & da Informacao	0102-4388	2236-7594	Universidade Federal do Rio Grande		OJS	Brazil	No	https://seer.furg.br/biblos/about/editorialPolicies#focusAndScope				https://seer.furg.br/biblos/about/editorialPolicies#focusAndScope							LOCKSS			https://thekeepers.org/purl/issn/0102-4388	Yes				2004	PDF	technology of information, library science, information science	Portuguese	http://www.seer.furg.br/biblos/about/editorialTeam	Peer review	https://www.seer.furg.br/biblos/about/editorialPolicies#peerReviewProcess	http://www.seer.furg.br/biblos/about/editorialPolicies#focusAndScope	https://www.seer.furg.br/biblos/about/submissions#authorGuidelines			10	https://www.seer.furg.br/biblos/about/editorialPolicies#openAccessPolicy			CC BY-NC		https://www.seer.furg.br/biblos/about/submissions#copyrightNotice	Yes	Diadorim	False
DELTA: Documentação de Estudos em Lingüística Teórica e Aplicada	http://www.scielo.br/scielo.php?pid=0102-4450&script=sci_serial	DELTA	0102-4450	1678-460X	Pontifícia Universidade Católica de São Paulo		SciELO Brazil	Brazil	No	http://www.scielo.br/revistas/delta/iinstruc.htm				http://www.scielo.br/revistas/delta/iinstruc.htm											Yes	DOI			1997	PDF, HTML, XML	linguistics, letters and arts	English, French, Italian, Portuguese, Spanish; Castilian	http://www.scielo.br/revistas/delta/iedboard.htm	Editorial review	http://www.scielo.br/revistas/delta/iinstruc.htm	http://www.scielo.br/revistas/delta/iaboutj.htm	http://www.scielo.br/revistas/delta/iinstruc.htm			52	http://www.scielo.br/revistas/delta/isubscrp.htm		http://www.scielo.br/scielo.php?script=sci_arttext&pid=S0102-44502015000100069&lng=en&nrm=iso&tlng=pt	CC BY		http://www.scielo.br/revistas/delta/iaboutj.htm	Yes		False
Perspectiva Teológica	http://www.perspectiva.faje.edu.br		0102-4469	2176-8757	Faculdade Jesuíta de Filosofia e Teologia		OJS	Brazil	No	http://www.faje.edu.br/periodicos/index.php/perspectiva/about/editorialPolicies#custom-14				http://www.faje.edu.br/periodicos/index.php/perspectiva/about/editorialPolicies#custom-14											Yes				1969	PDF	latin american theology	English, French, Italian, Portuguese, Spanish; Castilian	http://www.faje.edu.br/periodicos/index.php/perspectiva/about/editorialTeam	Double blind peer review	http://www.faje.edu.br/periodicos/index.php/perspectiva/about/editorialPolicies#peerReviewProcess	http://www.faje.edu.br/periodicos/index.php/perspectiva/about/editorialPolicies#focusAndScope	http://www.faje.edu.br/periodicos/index.php/perspectiva/about/submissions#authorGuidelines	Yes	http://www.faje.edu.br/periodicos/index.php/perspectiva/about/editorialPolicies#custom-1	16	http://www.faje.edu.br/periodicos/index.php/perspectiva/about/editorialPolicies#openAccessPolicy			CC BY-NC		http://www.faje.edu.br/periodicos/index.php/perspectiva/about/editorialPolicies#custom-7	Yes	Diadorim	False
Educação em Revista	http://www.scielo.br/scielo.php?script=sci_serial&lng=pt&pid=0102-4698&nrm=iso		0102-4698	1982-6621	Universidade Federal de Minas Gerais		SciELO Brazil	Brazil	No	http://www.scielo.br/revistas/edur/iinstruc.htm#02				http://www.scielo.br/revistas/edur/iinstruc.htm#02											Yes	DOI			2007	PDF, HTML, XML	teaching	English	http://www.scielo.br/revistas/edur/iedboard.htm	Double blind peer review	http://www.scielo.br/revistas/edur/iinstruc.htm	http://www.scielo.br/revistas/edur/iaboutj.htm	http://www.scielo.br/revistas/edur/iinstruc.htm			37	http://www.scielo.br/revistas/edur/isubscrp.htm	Yes	http://www.scielo.br/scielo.php?script=sci_arttext&pid=S0102-46982015000200061&lng=en&nrm=iso&tlng=pt	CC BY-NC		http://www.scielo.br/scielo.php?script=sci_serial&lng=pt&pid=0102-4698&nrm=iso	Yes		False
Revista Brasileira de Ensino de Física	http://www.scielo.br/scielo.php?script=sci_serial&lng=pt&pid=1806-1117&nrm=iso		0102-4744		Sociedade Brasileira de Física		SciELO Brazil	Brazil	No	http://www.scielo.br/revistas/rbef/pinstruc.htm				http://www.scielo.br/revistas/rbef/pinstruc.htm											Yes	DOI			2001	PDF, HTML, XML	exact and earth sciences	Portuguese	http://www.scielo.br/revistas/rbef/pedboard.htm	Peer review	http://www.scielo.br/revistas/rbef/pinstruc.htm	http://www.scielo.br/revistas/rbef/pinstruc.htm	http://www.scielo.br/revistas/rbef/pinstruc.htm	Yes	http://www.scielo.br/revistas/rbef/pinstruc.htm	16	http://www.scielo.br/revistas/rbef/psubscrp.htm		http://www.scielo.br/revistas/rbef/paboutj.htm	CC BY		http://www.scielo.br/revistas/rbef/psubscrp.htm			False
O Eixo e a Roda: Revista de Literatura Brasileira	http://www.periodicos.letras.ufmg.br/index.php/o_eixo_ea_roda/index		0102-4809	2358-9787	Universidade Federal de Minas Gerais	Universidade Federal de Minas Gerais	OJS	Brazil	No	http://www.periodicos.letras.ufmg.br/index.php/o_eixo_ea_roda/index				http://www.periodicos.letras.ufmg.br/index.php/o_eixo_ea_roda/index												DOI			1982	PDF, HTML	Brazilian literature	French, Portuguese, Spanish; Castilian	http://www.periodicos.letras.ufmg.br/index.php/o_eixo_ea_roda/about/editorialTeam	Peer review	http://www.periodicos.letras.ufmg.br/index.php/o_eixo_ea_roda/about/editorialPolicies#peerReviewProcess	http://www.periodicos.letras.ufmg.br/index.php/o_eixo_ea_roda/about/editorialPolicies#focusAndScope	http://www.periodicos.letras.ufmg.br/index.php/o_eixo_ea_roda/about/submissions#authorGuidelines	Yes	http://www.periodicos.letras.ufmg.br/index.php/o_eixo_ea_roda/about/editorialPolicies#peerReviewProcess	12	http://www.periodicos.letras.ufmg.br/index.php/o_eixo_ea_roda/about/editorialPolicies#openAccessPolicy	Yes	http://www.periodicos.letras.ufmg.br/index.php/o_eixo_ea_roda/article/view/8506	CC BY-NC-ND		http://www.periodicos.letras.ufmg.br/index.php/o_eixo_ea_roda/index	Yes		False
Boletim de Geografia	http://www.periodicos.uem.br/ojs/index.php/BolGeogr/		0102-5198	2176-4786	Universidade Estadual de Maringá	Universidade Estadual de Maringá, Departamento de Geografia	OJS	Brazil	No	http://www.periodicos.uem.br/ojs/index.php/BolGeogr/about/editorialPolicies#openAccessPolicy				http://www.periodicos.uem.br/ojs/index.php/BolGeogr/about/editorialPolicies#openAccessPolicy									Cariniana Network	http://www.periodicos.uem.br/ojs/index.php/BolGeogr/about/editorialPolicies#focusAndScope	Yes	DOI			2009	PDF	human geography, geography	Portuguese	http://www.periodicos.uem.br/ojs/index.php/BolGeogr/about/editorialTeam	Double blind peer review	http://www.periodicos.uem.br/ojs/index.php/BolGeogr/about/editorialPolicies#peerReviewProcess	http://www.periodicos.uem.br/ojs/index.php/BolGeogr/about/editorialPolicies#focusAndScope	http://www.periodicos.uem.br/ojs/index.php/BolGeogr/about/submissions#authorGuidelines	Yes	http://www.periodicos.uem.br/ojs/index.php/BolGeogr/about/editorialPolicies#peerReviewProcess	52	http://www.periodicos.uem.br/ojs/index.php/BolGeogr/about/editorialPolicies#openAccessPolicy			CC BY-NC		http://www.periodicos.uem.br/ojs/index.php/BolGeogr/about/submissions#copyrightNotice	Yes		True
Estudos Linguísticos e Literários	http://www.portalseer.ufba.br/index.php/estudos/index		0102-5465	2176-4794	Universidade Federal da Bahia		OJS	Brazil	No	http://www.portalseer.ufba.br/index.php/estudos/about/submissions#onlineSubmissions				http://www.portalseer.ufba.br/index.php/estudos/about/submissions#onlineSubmissions					Yes	http://www.portalseer.ufba.br/index.php/estudos/about/submissions#copyrightNotice	LOCKSS			http://www.portalseer.ufba.br/index.php/estudos/gateway/lockss			Yes	http://www.portalseer.ufba.br/index.php/estudos/manager/statistics	2015	PDF	Estudos Linguísticos, Estudos Literários	English, German, Italian, Portuguese, Spanish; Castilian	http://www.portalseer.ufba.br/index.php/estudos/about/editorialTeam	Double blind peer review	http://www.portalseer.ufba.br/index.php/estudos/about/editorialPolicies#peerReviewProcess	http://www.portalseer.ufba.br/index.php/estudos/about/editorialPolicies#focusAndScope	http://www.portalseer.ufba.br/index.php/estudos/about/submissions#authorGuidelines			4	http://www.portalseer.ufba.br/index.php/estudos/about/editorialPolicies#openAccessPolicy			Publisher's own license		http://www.portalseer.ufba.br/index.php/estudos/about/editorialPolicies#openAccessPolicy	Yes		False
Perspectiva	https://periodicos.ufsc.br/index.php/perspectiva	Perspectiva – Revista do Centro de Ciências da Educação	0102-5473	2175-795X	Universidade Federal de Santa Catarina	fepae	OJS	Brazil	No	https://periodicos.ufsc.br/index.php/perspectiva/about/submissions#authorGuidelines				https://periodicos.ufsc.br/index.php/perspectiva/about/submissions#authorGuidelines										https://periodicos.ufsc.br/index.php/perspectiva/about/editorialPolicies#archiving	Yes	DOI			1983	PDF	educational policy, teaching, research, teacher training, Brazil	English, Portuguese, Spanish; Castilian	https://periodicos.ufsc.br/index.php/perspectiva/about/editorialTeam	Double blind peer review	https://periodicos.ufsc.br/index.php/perspectiva/about/editorialPolicies#peerReviewProcess	https://periodicos.ufsc.br/index.php/perspectiva/about/editorialPolicies#focusAndScope	https://periodicos.ufsc.br/index.php/perspectiva/about/submissions#authorGuidelines			40	https://periodicos.ufsc.br/index.php/perspectiva/about/editorialPolicies#openAccessPolicy			CC BY-NC-ND		https://periodicos.ufsc.br/index.php/perspectiva/about/submissions#copyrightNotice	Yes	Sherpa/Romeo	True
Boletim Técnico do Senac	http://www.bts.senac.br	Boletim Técnico do Serviço Nacional de Aprendizagem Comercial	0102-549X	2448-1483	Serviço Nacional de Aprendizagem Comercial	Serviço Nacional de Aprendizagem Comercial	OJS	Brazil	No	http://www.bts.senac.br/index.php/bts/about/submissions#onlineSubmissions				http://www.bts.senac.br/index.php/bts/about/submissions#onlineSubmissions					Yes	http://www.bts.senac.br/index.php/bts/about/submissions#authorGuidelines				http://www.bts.senac.br/index.php/bts/about/editorialPolicies#archiving	Yes				2015	PDF	education, work, vocational education	Portuguese	http://www.bts.senac.br/index.php/bts/about/displayMembership/18	Peer review	http://www.bts.senac.br/index.php/bts/about/editorialPolicies#peerReviewProcess	http://www.bts.senac.br/index.php/bts/about/editorialPolicies#focusAndScope	http://www.bts.senac.br/index.php/bts/about/submissions#onlineSubmissions	Yes	http://www.bts.senac.br/index.php/bts/about/submissions#onlineSubmissions	16	http://www.bts.senac.br/index.php/bts/about/editorialPolicies#openAccessPolicy	Yes	http://www.bts.senac.br/index.php/bts/article/view/17	CC BY-NC		http://www.bts.senac.br/index.php/bts/about/submissions#copyrightNotice	Yes		False
Organon	http://seer.ufrgs.br/organon		0102-6267	2238-8915	Universidade Federal do Rio Grande do Sul	Universidade Federal do Rio Grande do Sul, Instituto de Letras	SEER	Brazil	No															http://seer.ufrgs.br/index.php/organon/about/editorialPolicies#archiving	Yes				1956	PDF	language, literature, linguistics, literary theory, cultural studies	English, French, Portuguese, Spanish; Castilian	http://seer.ufrgs.br/index.php/organon/about/editorialTeam	Double blind peer review	http://seer.ufrgs.br/index.php/organon/about/editorialPolicies#peerReviewProcess	http://seer.ufrgs.br/index.php/organon/about/editorialPolicies#focusAndScope	http://seer.ufrgs.br/index.php/organon/about/submissions#authorGuidelines		http://seer.ufrgs.br/index.php/organon/about/editorialPolicies#custom-0	24	http://seer.ufrgs.br/index.php/organon/about/editorialPolicies#openAccessPolicy			CC BY		http://seer.ufrgs.br/organon	Yes	Diadorim	False
Lua Nova: Revista de Cultura e Política	http://www.scielo.br/scielo.php?script=sci_serial&lng=en&pid=0102-6445&nrm=iso		0102-6445		Centro de Estudos de Cultura Contemporânea, CEDEC		SciELO Brazil	Brazil	No	http://www.scielo.br/revistas/ln/iinstruc.htm				http://www.scielo.br/revistas/ln/iinstruc.htm											Yes	DOI	Yes	http://www.scielo.br/statjournal.php?lang=en&issn=0102-6445	1988	PDF, HTML	democracy, citizenship, rights	Portuguese	http://www.scielo.br/revistas/ln/iedboard.htm	Blind peer review	http://www.scielo.br/revistas/ln/iinstruc.htm	http://www.scielo.br/revistas/ln/iaboutj.htm	http://www.scielo.br/revistas/ln/iinstruc.htm			20	http://www.scielo.br/revistas/ln/isubscrp.htm	Yes	http://www.scielo.br/scielo.php?script=sci_arttext&pid=S0102-64452014000300002&lng=en&nrm=iso&tlng=pt	CC BY		http://www.scielo.br/revistas/ln/iaboutj.htm	Yes		False
ABCD: Arquivos Brasileiros de Cirurgia Digestiva	http://www.scielo.br/scielo.php?script=sci_serial&pid=0102-6720&lng=en&nrm=iso	Brazilian Archives of Digestive Surgery	0102-6720		Colégio Brasileiro de Cirurgia Digestiva		SciELO Brazil	Brazil	No	http://www.scielo.br/revistas/abcd/iinstruc.htm#003				http://www.scielo.br/revistas/abcd/iinstruc.htm#003										http://www.scielo.br/revistas/abcd/iinstruc.htm	Yes	DOI	Yes	http://www.scielo.br/statjournal.php?lang=en&issn=0102-6720	2017	PDF, HTML, XML	gastroenterology, digestive system diseases, intestinal diseases	English, Portuguese	http://www.scielo.br/revistas/abcd/iedboard.htm	Peer review	http://www.scielo.br/revistas/abcd/iinstruc.htm	http://www.scielo.br/revistas/abcd/iaboutj.htm	http://www.scielo.br/revistas/abcd/iinstruc.htm			16	http://www.scielo.br/revistas/abcd/isubscrp.htm	Yes	http://www.scielo.br/scielo.php?script=sci_arttext&pid=S0102-67202015000300163&lng=en&nrm=iso&tlng=en	CC BY		http://www.scielo.br/revistas/abcd/iaboutj.htm	Yes		False
Revista Brasileira de Ciências Sociais	http://www.scielo.br/scielo.php?script=sci_serial&pid=0102-6909&lng=en&nrm=iso		0102-6909		Associação Nacional de Pós-Graduação e Pesquisa em Ciências Sociais (ANPOCS)		SciELO Brazil	Brazil	No	http://www.scielo.br/revistas/rbcsoc/iinstruc.htm				http://www.scielo.br/revistas/rbcsoc/iinstruc.htm											Yes	DOI	Yes	http://www.scielo.br/statjournal.php?lang=en&issn=0102-6909	1997	PDF, HTML, XML	Political Science, anthropology, political science, sociology	Portuguese	http://www.scielo.br/revistas/rbcsoc/iedboard.htm	Double blind peer review	http://www.scielo.br/revistas/rbcsoc/iinstruc.htm	http://www.scielo.br/revistas/rbcsoc/iinstruc.htm	http://www.scielo.br/revistas/rbcsoc/iinstruc.htm			52	http://www.scielo.br/revistas/rbcsoc/isubscrp.htm	Yes	http://www.scielo.br/scielo.php?script=sci_arttext&pid=S0102-69092015000200061&lng=en&nrm=iso&tlng=pt	CC BY		http://www.scielo.br/revistas/rbcsoc/isubscrp.htm	Yes		False
Revista Gaúcha de Enfermagem	http://www.scielo.br/scielo.php?script=sci_serial&pid=1983-1447&lng=en&nrm=iso	Revista Gaucha de Enfermagem	0102-6933	1983-1447	Universidade Federal do Rio Grande do Sul		SciELO Brazil	Brazil	Yes	http://www.scielo.br/revistas/rgenf/iinstruc.htm	500	BRL - Brazilian Real	Yes	http://www.scielo.br/revistas/rgenf/iinstruc.htm	80	BRL - Brazilian Real								http://www.scielo.br/revistas/rgenf/iinstruc.htm	Yes	DOI	Yes	http://www.scielo.br/statjournal.php?lang=en&issn=1983-1447	2009	PDF, HTML, XML	nursing	English, Portuguese, Spanish; Castilian	http://www.scielo.br/revistas/rgenf/iedboard.htm	Double blind peer review	http://www.scielo.br/revistas/rgenf/iinstruc.htm	http://www.scielo.br/revistas/rgenf/iaboutj.htm	http://www.scielo.br/revistas/rgenf/iinstruc.htm		http://www.scielo.br/revistas/rgenf/iinstruc.htm	16	http://www.scielo.br/revistas/rgenf/isubscrp.htm	Yes	http://www.scielo.br/scielo.php?script=sci_arttext&pid=S1983-14472015000300049&lng=en&nrm=iso&tlng=en	CC BY-NC		http://www.scielo.br/scielo.php?script=sci_serial&pid=1983-1447&lng=en&nrm=iso	Yes		False
Revista Brasileira de Farmacognosia	http://www.scielo.br/scielo.php/script_sci_serial/pid_0102-695X/lng_en/nrm_iso		0102-695X	1981-528X	Sociedade Brasileira de Farmacognosia		SciELO Brazil	Brazil	Yes	http://www.scielo.br/revistas/rbfar/iinstruc.htm	450	USD - US Dollar		http://www.scielo.br/revistas/rbfar/iinstruc.htm					Yes	http://www.scielo.br/revistas/rbfar/iinstruc.htm				http://www.scielo.br/revistas/rbfar/iinstruc.htm	Yes				2000	PDF, HTML, XML	pharmacognosy	English, Portuguese, Spanish; Castilian	http://www.scielo.br/revistas/rbfar/iedboard.htm	Blind peer review	http://www.scielo.br/revistas/rbfar/iinstruc.htm	http://www.scielo.br/revistas/rbfar/iinstruc.htm	http://www.scielo.br/revistas/rbfar/iinstruc.htm	Yes	http://www.scielo.br/revistas/rbfar/iinstruc.htm	16	http://www.scielo.br/revistas/rbfar/iinstruc.htm	Yes	http://www.scielo.br/scielo.php?script=sci_arttext&pid=S0102-695X2015000300212&lng=en&nrm=iso&tlng=en	CC BY-NC-ND		http://www.scielo.br/scielo.php/script_sci_serial/pid_0102-695X/lng_en/nrm_iso	Yes		False
Sociedade e Estado	http://www.scielo.br/se	Sociedade & Estado	0102-6992	1980-5462	Universidade de Brasília		SciELO Brazil	Brazil	No	http://www.scielo.br/revistas/se/iinstruc.htm#003				http://www.scielo.br/revistas/se/iinstruc.htm#003										http://www.scielo.br/revistas/se/iinstruc.htm	Yes				2000	PDF, HTML, XML	social sciences, social movements, social conditions, politics, sociology	English, Portuguese, Spanish; Castilian	http://www.scielo.br/revistas/se/iedboard.htm	Peer review	http://www.scielo.br/revistas/se/iinstruc.htm	http://www.scielo.br/revistas/se/iinstruc.htm	http://www.scielo.br/revistas/se/iinstruc.htm			13	http://www.scielo.br/revistas/se/isubscrp.htm	Yes	http://www.scielo.br/scielo.php?script=sci_arttext&pid=S0102-69922015000200313&lng=en&nrm=iso&tlng=pt	CC BY-NC		http://www.scielo.br/scielo.php/script_sci_serial/pid_0102-6992/lng_en/nrm_iso	Yes		False
Acervo	http://revista.arquivonacional.gov.br/index.php/revistaacervo		0102-700X	2237-8723	Arquivo Nacional	Arquivo Nacional	OJS	Brazil	No	http://revista.arquivonacional.gov.br/index.php/revistaacervo/about/editorialPolicies#custom-0				http://revista.arquivonacional.gov.br/index.php/revistaacervo/about/editorialPolicies#custom-0															2010	PDF	archivology, history	Portuguese	http://revista.arquivonacional.gov.br/index.php/revistaacervo/about/editorialTeam	Double blind peer review	http://revista.arquivonacional.gov.br/index.php/revistaacervo/about/editorialPolicies#peerReviewProcess	http://revista.arquivonacional.gov.br/index.php/revistaacervo/about/editorialPolicies#focusAndScope	http://revista.arquivonacional.gov.br/index.php/revistaacervo/about/submissions#authorGuidelines			15	http://revista.arquivonacional.gov.br/index.php/revistaacervo/about/editorialPolicies#openAccessPolicy	Yes	http://revista.arquivonacional.gov.br/index.php/revistaacervo/article/view/519	CC BY-NC-ND		http://revista.arquivonacional.gov.br/index.php/revistaacervo/index	Yes		False
Psicologia & Sociedade	http://www.scielo.br/scielo.php?pid=0102-7182&script=sci_serial		0102-7182	1807-0310	Associação Brasileira de Psicologia Social		SciELO Brazil	Brazil	No	http://www.scielo.br/revistas/psoc/iinstruc.htm#001				http://www.scielo.br/revistas/psoc/iinstruc.htm#001											Yes	DOI	Yes	http://www.scielo.br/statjournal.php?lang=en&issn=0102-7182	2002	PDF, HTML, XML	psychology and society, social psychology	French, Portuguese, Spanish; Castilian	http://www.scielo.br/revistas/psoc/iedboard.htm	Double blind peer review	http://www.scielo.br/revistas/psoc/iinstruc.htm	http://www.scielo.br/revistas/psoc/iinstruc.htm	http://www.scielo.br/revistas/psoc/iinstruc.htm			36	http://www.scielo.br/revistas/psoc/isubscrp.htm	Yes	http://www.scielo.br/scielo.php?script=sci_arttext&pid=S0102-71822015000100035&lng=en&nrm=iso&tlng=pt	CC BY		http://www.scielo.br/scielo.php?pid=0102-7182&script=sci_serial	Yes		False
Sinergia: Revista do Instituto de Ciências Econômicas, Administrativas e Contábeis	https://seer.furg.br/sinergia/		0102-7360	2236-7608	Universidade Federal do Rio Grande		OJS	Brazil	No	https://www.seer.furg.br/sinergia/about/editorialPolicies#peerReviewProcess				https://www.seer.furg.br/sinergia/about/editorialPolicies#peerReviewProcess													Yes	https://seer.furg.br/sinergia/article/view/3887	1985	PDF	accounting sciences, accounting	Portuguese	https://seer.furg.br/sinergia/about/editorialTeam	Blind peer review	https://seer.furg.br/sinergia/about/editorialPolicies#peerReviewProcess	https://seer.furg.br/sinergia/about/editorialPolicies#focusAndScope	https://seer.furg.br/sinergia/about/submissions#authorGuidelines			30	https://seer.furg.br/sinergia/about/editorialPolicies#openAccessPolicy			CC BY		https://seer.furg.br/sinergia/about/editorialPolicies#openAccessPolicy	Yes		False
Distúrbios da Comunicação	https://revistas.pucsp.br/index.php/dic		0102-762X	2176-2724	Pontifícia Universidade Católica de São Paulo	Pontifícia Universidade Católica de São Paulo	Open Journal System (OJS)	Brazil	No	https://revistas.pucsp.br/index.php/dic/about/editorialPolicies#custom-0				https://revistas.pucsp.br/index.php/dic/about/editorialPolicies#custom-0										https://thekeepers.org/journals?query=0102-762X					1986	PDF	language, voice, phonoaudiology	Portuguese	https://revistas.pucsp.br/index.php/dic/about/editorialTeam	Peer review	https://revistas.pucsp.br/index.php/dic/about/editorialPolicies#peerReviewProcess	https://revistas.pucsp.br/index.php/dic/index	https://revistas.pucsp.br/index.php/dic/about/submissions#authorGuidelines			32	https://revistas.pucsp.br/index.php/dic/about/editorialPolicies#openAccessPolicy			CC BY-NC-SA		https://revistas.pucsp.br/index.php/dic/index	Yes		False
Brazilian Journal of Cardiovascular Surgery	http://www.scielo.br/scielo.php?pid=0102-7638&script=sci_serial	Revista Brasileira de Cirurgia Cardiovascular	0102-7638	1678-9741	Sociedade Brasileira de Cirurgia Cardiovascular	Sociedade Brasileira de Cirurgia Cardiovascular	SciELO Brazil	Brazil	No	http://www.scielo.br/revistas/rbccv/iinstruc.htm				http://www.scielo.br/revistas/rbccv/iinstruc.htm											Yes	DOI	Yes	http://www.scielo.br/statjournal.php?lang=en&issn=0102-7638	1986	PDF, HTML, XML	cardiovascular surgery	English	http://www.scielo.br/revistas/rbccv/iedboard.htm	Peer review	http://www.scielo.br/revistas/rbccv/iinstruc.htm	http://www.scielo.br/revistas/rbccv/iinstruc.htm	http://www.scielo.br/revistas/rbccv/iinstruc.htm			20	http://www.scielo.br/revistas/rbccv/isubscrp.htm	Yes	http://www.scielo.br/scielo.php?script=sci_arttext&pid=S0102-76382015000100005&lng=en&nrm=iso&tlng=en	CC BY		http://www.scielo.br/revistas/rbccv/isubscrp.htm	Yes		False
Revista Educação em Questão	http://www.periodicos.ufrn.br/educacaoemquestao/index		0102-7735	1981-1802	Universidade Federal do Rio Grande do Norte	Universidade Federal do Rio Grande do Norte, Departamento de Educação, Programa de Pós-Graduação em Educação	OJS	Brazil	No	https://periodicos.ufrn.br/educacaoemquestao/about/submissions#onlineSubmissions				https://periodicos.ufrn.br/educacaoemquestao/about/submissions#onlineSubmissions										http://www.periodicos.ufrn.br/educacaoemquestao/about/editorialPolicies#openAccessPolicy	Yes				1996	PDF	education, didacticism	Portuguese	http://www.periodicos.ufrn.br/educacaoemquestao/about/editorialTeam	Blind peer review	https://periodicos.ufrn.br/educacaoemquestao/about/editorialPolicies#peerReviewProcess	http://www.periodicos.ufrn.br/educacaoemquestao/about/editorialPolicies#focusAndScope	https://periodicos.ufrn.br/educacaoemquestao/about/submissions#onlineSubmissions			12	http://www.periodicos.ufrn.br/educacaoemquestao/about/editorialPolicies#openAccessPolicy			CC BY-NC		https://periodicos.ufrn.br/educacaoemquestao/index	Yes	Diadorim	False
Revista Brasileira de Meteorologia	http://www.scielo.br/scielo.php?script=sci_serial&pid=0102-7786&lng=en&nrm=iso		0102-7786	1982-4351	Sociedade Brasileira de Meteorologia		SciELO Brazil	Brazil	No	http://www.scielo.br/revistas/rbmet/iinstruc.htm#01				http://www.scielo.br/revistas/rbmet/iinstruc.htm#01										http://www.scielo.br/revistas/rbmet/iinstruc.htm	Yes		Yes		2007	PDF, HTML, XML	climatology, synoptic, hydrometeorology, remote sensing of the atmosphere, atmospheric modeling, climatic modeling	English, Portuguese	http://www.scielo.br/revistas/rbmet/iedboard.htm	Peer review	http://www.scielo.br/revistas/rbmet/iinstruc.htm	http://www.scielo.br/revistas/rbmet/iinstruc.htm	http://www.scielo.br/revistas/rbmet/iinstruc.htm			16	http://www.scielo.br/revistas/rbmet/isubscrp.htm	Yes	http://www.scielo.br/scielo.php?script=sci_arttext&pid=S0102-77862015000200134&lng=en&nrm=iso&tlng=pt	CC BY		http://www.scielo.br/scielo.php?script=sci_serial&pid=0102-7786&lng=en&nrm=iso	Yes		False
Psicologia: Reflexão e Crítica	https://prc.springeropen.com	Psychology: Reflection and Criticism	0102-7972	1678-7153	SpringerOpen	Universidade Federal do Rio Grande do Sul	SpringerOpen	United Kingdom	Yes	https://prc.springeropen.com/about	660	GBP - Pound Sterling		https://prc.springeropen.com/about					Yes	https://prc.springeropen.com/about	CLOCKSS			http://www.springeropen.com/get-published/indexing-archiving-and-access-to-data/journal-archiving	Yes	DOI	Yes	https://www.springer.com/gp/authors-editors/journal-author/journal-author-helpdesk/article-level-metrics/23400	1997	PDF, HTML	psychology, human development, psychological assessment, experimental psychology	English	https://prc.springeropen.com/about/editorial-board	Blind peer review	https://prc.springeropen.com/about	https://prc.springeropen.com/about	https://prc.springeropen.com/submission-guidelines	Yes	http://www.springeropen.com/get-published/editorial-policies#duplicate+publication	24	https://prc.springeropen.com/about	Yes	https://prc.springeropen.com/articles/10.1186/s41155-016-0051-7	CC BY		https://www.springeropen.com/get-published/copyright/copyright-and-license-agreement	Yes	Sherpa/Romeo	True
Contexto Internacional	http://www.scielo.br/scielo.php?script=sci_serial&lng=pt&pid=0102-8529&nrm=iso		0102-8529	1982-0240	Pontifícia Universidade Católica do Rio de Janeiro		SciELO Brazil	Brazil	No	http://www.scielo.br/revistas/cint/iinstruc.htm#001				http://www.scielo.br/revistas/cint/iinstruc.htm#001											Yes	DOI			2006	PDF, HTML, XML	international relations	French, Portuguese, Spanish; Castilian	http://www.scielo.br/revistas/cint/iedboard.htm	Double blind peer review	http://www.scielo.br/revistas/cint/iinstruc.htm	http://www.scielo.br/scielo.php?script=sci_serial&pid=0102-8529&lng=en&nrm=iso	http://www.scielo.br/revistas/cint/iinstruc.htm			8	http://www.scielo.br/revistas/cint/isubscrp.htm	Yes	http://www.scielo.br/scielo.php?script=sci_arttext&pid=S0102-85292015000100081&lng=en&nrm=iso&tlng=pt	CC BY-NC		http://www.scielo.br/revistas/cint/iaboutj.htm	Yes		False
Acta Cirurgica Brasileira	http://www.scielo.br/scielo.php/script_sci_serial/lng_en/pid_0102-8650/nrm_iso		0102-8650		Sociedade Brasileira para o Desenvolvimento da Pesquisa em Cirurgia	Sociedade Brasileira para o Desenvolvimento da Pesquisa em Cirurgia-SOBRADPEC	SciELO Brazil	Brazil	Yes	http://www.scielo.br/revistas/acb/iinstruc.htm	800	BRL - Brazilian Real		http://www.scielo.br/revistas/acb/iinstruc.htm										http://www.scielo.br/revistas/acb/iinstruc.htm		DOI	Yes	http://www.scielo.br/statjournal.php?lang=en&issn=0102-8650	1997	PDF, HTML, XML	health sciences, surgery, laser therapy	English	http://www.scielo.br/revistas/acb/iedboard.htm	Peer review	http://www.scielo.br/revistas/acb/iinstruc.htm	http://www.scielo.br/revistas/acb/iaboutj.htm	http://www.scielo.br/revistas/acb/iinstruc.htm			5	http://www.scielo.br/revistas/acb/isubscrp.htm	Yes	http://www.scielo.br/scielo.php?script=sci_arttext&pid=S0102-86502015000600388&lng=en&nrm=iso&tlng=en	CC BY-NC		http://www.scielo.br/revistas/acb/iaboutj.htm	Yes		False
Revista Odonto Ciência	http://revistaseletronicas.pucrs.br/fo/ojs/index.php/fo	Journal of Dental Science	0102-9460	1980-6523	Editora da Pontifícia Universidade Católica do Rio Grande do Sul (EDIPUCRS)	Pontifícia Universidade Católica do Rio Grande do Sul	OJS	Brazil	No	http://revistaseletronicas.pucrs.br/ojs/index.php/fo/about/editorialPolicies#custom-8				http://revistaseletronicas.pucrs.br/ojs/index.php/fo/about/editorialPolicies#custom-8								Biblioteca Nacional do Brasil		http://revistaseletronicas.pucrs.br/fo/ojs/index.php/fo/about/editorialPolicies#archiving	Yes				2005	PDF	dentistry, dental science, dental medicine	English	http://revistaseletronicas.pucrs.br/fo/ojs/index.php/fo/about/editorialTeam	Double blind peer review	http://revistaseletronicas.pucrs.br/fo/ojs/index.php/fo/about/editorialPolicies#peerReviewProcess	http://revistaseletronicas.pucrs.br/fo/ojs/index.php/fo/about/editorialPolicies#focusAndScope	http://revistaseletronicas.pucrs.br/fo/ojs/index.php/fo/about/submissions#authorGuidelines			10	http://revistaseletronicas.pucrs.br/fo/ojs/index.php/fo/about/editorialPolicies#openAccessPolicy	Yes	http://revistaseletronicas.pucrs.br/fo/ojs/index.php/fo/article/view/11504/11777	CC BY		http://revistaseletronicas.pucrs.br/ojs/index.php/fo/about	Yes	Sherpa/Romeo	True
Caderno de Letras	https://periodicos.ufpel.edu.br/ojs2/index.php/cadernodeletras/index		0102-9576	2358-1409	Universidade Federal de Pelotas	Universidade Federal de Pelotas	OJS	Brazil	No	https://periodicos.ufpel.edu.br/ojs2/index.php/cadernodeletras/about/submissions#authorFees				https://periodicos.ufpel.edu.br/ojs2/index.php/cadernodeletras/about/submissions#authorFees										https://periodicos.ufpel.edu.br/ojs2/index.php/cadernodeletras/about/editorialPolicies#sectionPolicies					1982	PDF	literature, linguistics, translation, internationalization	Portuguese, Spanish; Castilian	https://periodicos.ufpel.edu.br/ojs2/index.php/cadernodeletras/about/editorialTeam	Double blind peer review	https://periodicos.ufpel.edu.br/ojs2/index.php/cadernodeletras/about/editorialPolicies#peerReviewProcess	https://periodicos.ufpel.edu.br/ojs2/index.php/cadernodeletras/index	https://periodicos.ufpel.edu.br/ojs2/index.php/cadernodeletras/about/submissions#authorGuidelines			8	https://periodicos.ufpel.edu.br/ojs2/index.php/cadernodeletras/about/editorialPolicies#openAccessPolicy			CC BY-NC-ND		https://periodicos.ufpel.edu.br/ojs2/index.php/cadernodeletras/about/submissions#onlineSubmissions	Yes		False
Revista Paulista de Pediatria	http://www.scielo.br/scielo.php?script=sci_serial&pid=0103-0582&lng=en&nrm=iso		0103-0582	1984-0462	Sociedade de Pediatria de São Paulo		SciELO Brazil	Brazil	No	http://www.scielo.br/revistas/rpp/iinstruc.htm#003				http://www.scielo.br/revistas/rpp/iinstruc.htm#003										http://www.scielo.br/revistas/rpp/iinstruc.htm	Yes				2007	PDF, HTML, XML	health, newborns, infants, children, adolescents	English, Portuguese, Spanish; Castilian	http://www.scielo.br/revistas/rpp/iedboard.htm	Peer review	http://www.scielo.br/revistas/rpp/iinstruc.htm	http://www.scielo.br/revistas/rpp/iinstruc.htm	http://www.scielo.br/revistas/rpp/iinstruc.htm			11	http://www.scielo.br/revistas/rpp/isubscrp.htm	Yes	http://www.scielo.br/scielo.php?script=sci_arttext&pid=S0103-05822015000300260&lng=en&nrm=iso&tlng=pt	CC BY		http://www.scielo.br/revistas/rpp/isubscrp.htm	Yes		False
Revista de Odontologia da Universidade de São Paulo	http://www.scielo.br/rousp		0103-0663		Universidade de São Paulo		SciELO Brazil	Brazil	No Information																				1997		health sciences	ENGLISH, PORTUGUESE
Saúde em Debate	http://www.scielo.br/scielo.php?script=sci_serial&pid=0103-1104&lng=en&nrm=iso		0103-1104	2358-2898	Centro Brasileiro de Estudos de Saúde			Brazil	No	http://www.scielo.br/revistas/sdeb/iinstruc.htm				http://www.scielo.br/revistas/sdeb/iinstruc.htm										http://www.scielo.br/revistas/sdeb/iinstruc.htm	Yes				2012	PDF, HTML	public health, program evaluation, policy, planning, management	English, Portuguese, Spanish; Castilian	http://www.scielo.br/revistas/sdeb/iedboard.htm	Double blind peer review	http://www.scielo.br/revistas/sdeb/iaboutj.htm	http://www.scielo.br/revistas/sdeb/iinstruc.htm	http://www.scielo.br/revistas/sdeb/iinstruc.htm	Yes	http://www.scielo.br/revistas/sdeb/iinstruc.htm	12	http://www.scielo.br/revistas/sdeb/isubscrp.htm	Yes	http://www.scielo.br/scielo.php?script=sci_arttext&pid=S0103-11042015000100030&lng=en&nrm=iso&tlng=pt	CC BY		http://www.scielo.br/scielo.php?script=sci_serial&pid=0103-1104&lng=en&nrm=iso	Yes		False
Verso e Reverso	http://revistas.unisinos.br/index.php/versoereverso/index	Verso & Reverso	0103-1414	1806-6925	Universidade do Vale do Rio dos Sinos		OJS	Brazil	No	http://revistas.unisinos.br/index.php/versoereverso/about/submissions#authorGuidelines				http://revistas.unisinos.br/index.php/versoereverso/about/submissions#authorGuidelines															2003	PDF	communication, mass media, journalism, film, new technologies	English, French, Portuguese, Spanish; Castilian	http://revistas.unisinos.br/index.php/versoereverso/about/editorialTeam	Peer review	http://revistas.unisinos.br/index.php/versoereverso/about/editorialPolicies#peerReviewProcess	http://revistas.unisinos.br/index.php/versoereverso/about/editorialPolicies#focusAndScope	http://revistas.unisinos.br/index.php/versoereverso/about/submissions#authorGuidelines			10	http://revistas.unisinos.br/index.php/versoereverso/about/editorialPolicies#openAccessPolicy	Yes	http://revistas.unisinos.br/index.php/versoereverso/article/view/ver.2013.27.64.07	CC BY		http://revistas.unisinos.br/index.php/versoereverso/index	Yes		False
Revista Sociedade & Natureza	http://www.seer.ufu.br/index.php/sociedadenatureza		0103-1570	1982-4513	Editora da Universidade Federal de Uberlândia	Universidade Federal de Uberlândia	Editora da Universidade Federal de Uberlândia	Brazil	No	http://www.seer.ufu.br/index.php/sociedadenatureza/about/editorialPolicies#focusAndScope				http://www.seer.ufu.br/index.php/sociedadenatureza/about/editorialPolicies#focusAndScope											Yes				2004	PDF, HTML	geography, nature, society	Portuguese	http://www.seer.ufu.br/index.php/sociedadenatureza/about/displayMembership/80	Double blind peer review	http://www.seer.ufu.br/index.php/sociedadenatureza/about/editorialPolicies#peerReviewProcess	http://www.seer.ufu.br/index.php/sociedadenatureza/about/editorialPolicies#focusAndScope	http://www.seer.ufu.br/index.php/sociedadenatureza/about/submissions#authorGuidelines			16	http://www.seer.ufu.br/index.php/sociedadenatureza/about/editorialPolicies#focusAndScope			Publisher's own license	Attribution, No Commercial Usage	http://www.seer.ufu.br/index.php/sociedadenatureza/about/submissions#privacyStatement			False
Biotemas	http://www.biotemas.ufsc.br/		0103-1643	2175-7925	Universidade Federal de Santa Catarina		Universidade Federal de Santa Catarina, Brasil	Brazil	Yes	https://periodicos.ufsc.br/index.php/biotemas/about/submissions#authorGuidelines	350	BRL - Brazilian Real	Yes	https://periodicos.ufsc.br/index.php/biotemas/about/submissions#authorGuidelines	350	BRL - Brazilian Real								https://periodicos.ufsc.br/index.php/biotemas/about/editorialPolicies#openAccessPolicy	Yes	DOI		http://stat.biotemas.periodicos.ufsc.br/awstats/awstats.pl	1998	PDF	biological sciences	English, Portuguese, Spanish; Castilian	https://periodicos.ufsc.br/index.php/biotemas/about/editorialTeam	Double blind peer review	https://periodicos.ufsc.br/index.php/biotemas/about/editorialPolicies#peerReviewProcess	https://periodicos.ufsc.br/index.php/biotemas/about/editorialPolicies#focusAndScope	https://periodicos.ufsc.br/index.php/biotemas/about/submissions#authorGuidelines			30	https://periodicos.ufsc.br/index.php/biotemas/about/editorialPolicies#openAccessPolicy	Yes	https://periodicos.ufsc.br/index.php/biotemas/article/view/2175-7925.2016v29n1p85	CC BY		https://periodicos.ufsc.br/index.php/biotemas/about/submissions#onlineSubmissions	Yes		True
Estudos de Psicologia (Campinas)	http://www.scielo.br/scielo.php?script=sci_serial&pid=0103-166X&lng=en&nrm=iso		0103-166X	1982-0275	Pontifícia Universidade Católica de Campinas	Programa de Pós-Graduação em Psicologia	SciELO Brazil	Brazil	No	http://www.scielo.br/revistas/estpsi/iaboutj.htm				http://www.scielo.br/revistas/estpsi/iaboutj.htm											Yes	DOI			2007	PDF, HTML, XML	psychological assessment, psychology	English, French, Portuguese, Spanish; Castilian	http://www.scielo.br/revistas/estpsi/iedboard.htm	Peer review	http://www.scielo.br/revistas/estpsi/iinstruc.htm	http://www.scielo.br/revistas/estpsi/iaboutj.htm	http://www.scielo.br/revistas/estpsi/iinstruc.htm	Yes	http://www.scielo.br/revistas/estpsi/iinstruc.htm	13	http://www.scielo.br/revistas/estpsi/iaboutj.htm	Yes	http://www.scielo.br/scielo.php?script=sci_arttext&pid=S0103-166X2015000300371&lng=en&nrm=iso&tlng=pt	CC BY-NC		http://www.scielo.br/revistas/estpsi/iaboutj.htm	Yes		False
Trabalhos em Lingüística Aplicada	http://www.scielo.br/scielo.php?script=sci_serial&pid=0103-1813&lng=en&nrm=iso		0103-1813		Universidade Estadual de Campinas		SciELO Brazil	Brazil	No	http://www.scielo.br/revistas/tla/iinstruc.htm#001				http://www.scielo.br/revistas/tla/iinstruc.htm#001										http://www.scielo.br/revistas/tla/iinstruc.htm	Yes				2008	PDF, HTML, XML	applied linguistics, translation, identity, learning native and foreign languages	English, Portuguese, Spanish; Castilian	http://www.scielo.br/revistas/tla/iedboard.htm	Peer review	http://www.scielo.br/revistas/tla/iinstruc.htm	http://www.scielo.br/revistas/tla/iinstruc.htm	http://www.scielo.br/revistas/tla/iinstruc.htm			19	http://www.scielo.br/revistas/tla/isubscrp.htm	Yes	http://www.scielo.br/scielo.php?script=sci_arttext&pid=S0103-18132014000200003&lng=en&nrm=iso&tlng=pt	CC BY		http://www.scielo.br/revistas/tla/isubscrp.htm	Yes		False
Revista de Economia e Sociologia Rural	http://www.scielo.br/resr		0103-2003	1806-9479	Sociedade Brasileira de Economia e Sociologia Rural		SciELO Brazil	Brazil	No	http://www.scielo.br/revistas/resr/iinstruc.htm#manuscript				http://www.scielo.br/revistas/resr/iinstruc.htm#manuscript											Yes				2002	PDF, HTML, XML	agricultural sciences	English, Portuguese	http://www.scielo.br/revistas/resr/iedboard.htm	Blind peer review	http://www.scielo.br/revistas/resr/iinstruc.htm	http://www.scielo.br/revistas/resr/iaboutj.htm	http://www.scielo.br/revistas/resr/iinstruc.htm			21	http://www.scielo.br/revistas/resr/isubscrp.htm	Yes	http://www.scielo.br/scielo.php?script=sci_arttext&pid=S0103-20032015000600009&lng=en&nrm=iso&tlng=pt	CC BY		http://www.scielo.br/revistas/resr/isubscrp.htm	Yes		False
Tempo Social	http://www.scielo.br/ts		0103-2070	1809-4554	Universidade de Sâo Paulo		SciELO Brazil	Brazil	No	http://www.scielo.br/revistas/ts/iinstruc.htm#001				http://www.scielo.br/revistas/ts/iinstruc.htm#001											Yes	DOI	Yes	http://www.scielo.br/statjournal.php?lang=en&issn=0103-2070	1999	PDF, HTML	sociology, sociological theory	Portuguese	http://www.scielo.br/revistas/ts/iedboard.htm	Blind peer review	http://www.scielo.br/revistas/ts/iinstruc.htm	http://www.scielo.br/revistas/ts/iinstruc.htm	http://www.scielo.br/revistas/ts/iinstruc.htm			42	http://www.scielo.br/revistas/ts/isubscrp.htm	Yes	http://www.scielo.br/scielo.php?script=sci_arttext&pid=S0103-20702014000100003&lng=en&nrm=iso&tlng=pt	CC BY-NC		http://www.scielo.br/scielo.php?script=sci_serial&pid=0103-2070&lng=en&nrm=iso	Yes		False
Acta Paulista de Enfermagem	http://www.scielo.br/scielo.php/script_sci_serial/pid_0103-2100/lng_en/nrm_iso		0103-2100		Universidade Federal de São Paulo	Universidade Federal de São Paulo, Escola Paulista de Enfermagem	SciELO Brazil	Brazil	Yes	http://www.scielo.br/revistas/ape/iinstruc.htm	1600	BRL - Brazilian Real	Yes	http://www.scielo.br/revistas/ape/iinstruc.htm	350	BRL - Brazilian Real								http://www.scielo.br/scielo.php?script=sci_issues&pid=0103-2100&lng=en&nrm=iso	Yes	DOI	Yes	http://www.scielo.br/statjournal.php?lang=en&issn=0103-2100	2005	PDF, HTML, XML	nursing, health sciences	English, Portuguese	http://www.scielo.br/revistas/ape/iedboard.htm	Peer review	http://www.scielo.br/revistas/ape/iinstruc.htm	http://www.scielo.br/revistas/ape/iaboutj.htm	http://www.scielo.br/revistas/ape/iinstruc.htm	Yes	http://www.scielo.br/revistas/ape/iinstruc.htm	4	http://www.scielo.br/revistas/ape/isubscrp.htm	Yes	http://www.scielo.br/scielo.php?script=sci_arttext&pid=S0103-21002015000400004&lng=en&nrm=iso&tlng=pt	CC BY-NC		http://www.scielo.br/revistas/ape/iaboutj.htm	Yes		False
Caligrama: Revista de Estudos Românicos	http://periodicos.letras.ufmg.br/index.php/caligrama		0103-2178	2238-3824	Universidade Federal de Minas Gerais		OJS	Brazil	No	http://www.periodicos.letras.ufmg.br/index.php/caligrama/about/submissions#authorGuidelines				http://www.periodicos.letras.ufmg.br/index.php/caligrama/about/submissions#authorGuidelines										http://www.periodicos.letras.ufmg.br/index.php/caligrama/about/editorialPolicies#archiving	Yes	DOI			1981	PDF	romance languages, romance literature, romance linguistics, romance philology	Catalan; Valencian, French, Galician, Italian, Portuguese, Romanian; Moldavian; Moldovan, Spanish; Castilian	http://www.periodicos.letras.ufmg.br/index.php/caligrama/about/editorialTeam	Peer review	http://www.periodicos.letras.ufmg.br/index.php/caligrama/about/editorialPolicies#peerReviewProcess	http://www.periodicos.letras.ufmg.br/index.php/caligrama/about/editorialPolicies#focusAndScope	http://www.periodicos.letras.ufmg.br/index.php/caligrama/about/submissions#authorGuidelines			24	http://www.periodicos.letras.ufmg.br/index.php/caligrama/about/editorialPolicies#openAccessPolicy			CC BY		http://www.periodicos.letras.ufmg.br/index.php/caligrama/index	Yes	Diadorim	False
Estudos Históricos	http://www.scielo.br/scielo.php?script=sci_serial&pid=0103-2186&lng=en&nrm=iso	Estudos Historicos	0103-2186	2178-1494	Fundação Getúlio Vargas	Centro de Pesquisa e Documentação de História Contemporânea do Brasil	SciELO Brazil	Brazil	No	http://www.scielo.br/revistas/eh/iinstruc.htm				http://www.scielo.br/revistas/eh/iinstruc.htm											Yes	DOI			2009	PDF, HTML, XML	history, social sciences, literature	English, Portuguese	http://www.scielo.br/revistas/eh/iedboard.htm	Blind peer review	http://www.scielo.br/revistas/eh/iinstruc.htm	http://www.scielo.br/revistas/eh/iinstruc.htm	http://www.scielo.br/revistas/eh/iinstruc.htm			11	http://www.scielo.br/revistas/eh/isubscrp.htm	Yes	http://www.scielo.br/scielo.php?script=sci_arttext&pid=S0103-21862014000200275&lng=en&nrm=iso&tlng=pt	CC BY-NC		http://www.scielo.br/revistas/eh/iaboutj.htm	Yes		False
Revista do Instituto Florestal	http://iflorestal.sp.gov.br/publicacoes-if/revista-do-if/		0103-2674	2178-5031	Instituto Florestal	Secretaria do Meio Ambiente, Governo do Estado de São Paulo	Instituto Florestal	Brazil	No	http://www.iflorestal.sp.gov.br/publicacoes/Instrucoes_aos_Autores/RIF_Instrucoes_aos_autores.pdf				http://www.iflorestal.sp.gov.br/publicacoes/Instrucoes_aos_Autores/RIF_Instrucoes_aos_autores.pdf										http://www.iflorestal.sp.gov.br/publicacoes/Instrucoes_aos_Autores/RIF_Instrucoes_aos_autores.pdf	Yes	DOI			1989	PDF	ecology, conservation, forests, tropical ecosystems, environmental sciences	English, Portuguese, Spanish; Castilian	http://iflorestal.sp.gov.br/publicacoes-if/revista-do-if/	Double blind peer review	http://www.iflorestal.sp.gov.br/publicacoes/Instrucoes_aos_Autores/RIF_Instrucoes_aos_autores.pdf	http://iflorestal.sp.gov.br/publicacoes-if/revista-do-if/	http://www.iflorestal.sp.gov.br/publicacoes/Instrucoes_aos_Autores/RIF_Instructions_to_authors.pdf		http://www.iflorestal.sp.gov.br/publicacoes/Instrucoes_aos_Autores/RIF_Instructions_to_authors.pdf	30	http://iflorestal.sp.gov.br/publicacoes-if/revista-do-if/		http://iflorestal.sp.gov.br/publicacoes-if/revista-do-if/	CC BY-NC		http://iflorestal.sp.gov.br/publicacoes-if/revista-do-if/	Yes		False
Teocomunicação	http://revistaseletronicas.pucrs.br/teo/ojs/index.php/teo	Teocomunicação: Revista da Teologia da PUCRS	0103-314X	1980-6736	Editora da Pontifícia Universidade Católica do Rio Grande do Sul (EDIPUCRS)	Pontifícia Universidade Católica do Rio Grande do Sul	OJS	Brazil	No	http://revistaseletronicas.pucrs.br/teo/ojs/index.php/teo/about/editorialPolicies#custom-7				http://revistaseletronicas.pucrs.br/teo/ojs/index.php/teo/about/editorialPolicies#custom-7								Biblioteca Nacional do Brasil		http://revistaseletronicas.pucrs.br/teo/ojs/index.php/teo/about/editorialPolicies#archiving	Yes	DOI			2005	PDF	theology	Portuguese	http://revistaseletronicas.pucrs.br/teo/ojs/index.php/teo/about/editorialTeam	Double blind peer review	http://revistaseletronicas.pucrs.br/teo/ojs/index.php/teo/about/editorialPolicies#peerReviewProcess	http://revistaseletronicas.pucrs.br/teo/ojs/index.php/teo/about/editorialPolicies#focusAndScope	http://revistaseletronicas.pucrs.br/teo/ojs/index.php/teo/about/submissions#authorGuidelines			10	http://revistaseletronicas.pucrs.br/teo/ojs/index.php/teo/about/editorialPolicies#openAccessPolicy	Yes	http://revistaseletronicas.pucrs.br/teo/ojs/index.php/teo/article/view/19787/12543	CC BY		http://revistaseletronicas.pucrs.br/teo/ojs/index.php/teo/index	Yes	Sherpa/Romeo	True
Revista Brasileira de Ciência Política	http://www.scielo.br/scielo.php?script=sci_serial&pid=0103-3352&lng=en&nrm=iso		0103-3352	2178-4884	Instituto de Ciência Política da Universidade de Brasília		SciELO Brazil	Brazil	No	http://www.scielo.br/revistas/rbcpol/iinstruc.htm				http://www.scielo.br/revistas/rbcpol/iinstruc.htm										http://periodicos.unb.br/index.php/rbcp/about/editorialPolicies#archiving	Yes	DOI	Yes	http://www.scielo.br/statjournal.php?lang=en&issn=0103-3352	2012	PDF, HTML, XML	political science, politics	Portuguese	http://www.scielo.br/revistas/rbcpol/iedboard.htm	Blind peer review	http://www.scielo.br/revistas/rbcpol/iinstruc.htm	http://www.scielo.br/scielo.php?script=sci_serial&pid=0103-3352&lng=en&nrm=iso	http://www.scielo.br/revistas/rbcpol/iinstruc.htm			16	http://www.scielo.br/revistas/rbcpol/isubscrp.htm	Yes	http://www.scielo.br/scielo.php?script=sci_arttext&pid=S0103-33522015000400081&lng=en&nrm=iso&tlng=pt	CC BY-NC		http://www.scielo.br/scielo.php?script=sci_serial&pid=0103-3352&lng=en&nrm=iso	Yes		False
Linha D'Água	http://www.revistas.usp.br/linhadagua		0103-3638	2236-4242	Universidade de São Paulo	Universidade de São Paulo	OJS	Brazil	No	http://www.revistas.usp.br/linhadagua/about/submissions#authorGuidelines				http://www.revistas.usp.br/linhadagua/about/submissions#authorGuidelines											Yes	DOI	Yes	http://www.revistas.usp.br/linhadagua/article/view/83770	1980	PDF	oral-written and digital modalities, literature, discursive processes, Portuguese language	French, Portuguese, Spanish; Castilian	http://www.revistas.usp.br/linhadagua/about/editorialTeam	Editorial review	http://www.revistas.usp.br/linhadagua/about/editorialPolicies	http://www.revistas.usp.br/linhadagua/about/editorialPolicies#focusAndScope	http://www.revistas.usp.br/linhadagua/about/submissions#authorGuidelines			12	http://www.revistas.usp.br/linhadagua/about/editorialPolicies#openAccessPolicy	Yes	http://revistas.usp.br/linhadagua/article/view/77933	CC BY-NC		http://www.revistas.usp.br/linhadagua/about/submissions#copyrightNotice	Yes	Diadorim	False
Transinformação	http://www.scielo.br/scielo.php?script=sci_serial&pid=0103-3786&lng=en&nrm=iso		0103-3786	2318-0889	Pontificia Universidade Católica de Campinas	PUC-Campinas	SciELO Brazil	Brazil	No	http://www.scielo.br/revistas/tinf/iinstruc.htm				http://www.scielo.br/revistas/tinf/iinstruc.htm										http://www.scielo.br/scielo.php?script=sci_serial&pid=0103-3786&lng=pt&nrm=iso	Yes	DOI	Yes	http://www.scielo.br/statjournal.php?lang=en&issn=0103-3786&collection=	2000	PDF, HTML, XML	bibliometry, scientific production, information science, library science, archival science	English, Portuguese, Spanish; Castilian	http://www.scielo.br/revistas/tinf/iedboard.htm	Double blind peer review	http://www.scielo.br/revistas/tinf/iinstruc.htm	http://www.scielo.br/revistas/tinf/iaboutj.htm	http://www.scielo.br/revistas/tinf/iinstruc.htm			36	http://www.scielo.br/revistas/tinf/isubscrp.htm	Yes	http://www.scielo.br/scielo.php?script=sci_arttext&pid=S0103-37862016000200143&lng=en&nrm=iso&tlng=en	CC BY		http://www.scielo.br/revistas/tinf/iaboutj.htm	Yes		False
Revista da Educação Física	http://periodicos.uem.br/ojs/index.php/RevEducFis	Journal of Physical Education	0103-3948	1983-3083	Universidade Estadual de Maringá		Maringá State University	Brazil	Yes	http://www.periodicos.uem.br/ojs/index.php/RevEducFis	200	BRL - Brazilian Real		http://www.periodicos.uem.br/ojs/index.php/RevEducFis							LOCKSS			https://thekeepers.org/journals?query=1983-3083		DOI			2007	PDF, XML	physical education, sports, health sciences	English, Portuguese	http://www.periodicos.uem.br/ojs/index.php/RevEducFis/about/editorialTeam	Peer review	http://www.periodicos.uem.br/ojs/index.php/RevEducFis/about/editorialPolicies#peerReviewProcess	http://www.periodicos.uem.br/ojs/index.php/RevEducFis/about/editorialPolicies#focusAndScope	http://www.periodicos.uem.br/ojs/index.php/RevEducFis/about/submissions#authorGuidelines			28	http://www.periodicos.uem.br/ojs/index.php/RevEducFis/about/editorialPolicies#openAccessPolicy			CC BY-NC		http://www.periodicos.uem.br/ojs/index.php/RevEducFis/about/editorialPolicies#custom-1	Yes		False
Estudos Avançados	http://www.scielo.br/scielo.php?pid=0103-4014&script=sci_serial		0103-4014	1806-9592	Universidade de São Paulo		SciELO Brazil	Brazil	No	http://www.scielo.br/revistas/ea/iinstruc.htm				http://www.scielo.br/revistas/ea/iinstruc.htm											Yes	DOI			1987	PDF, HTML, XML	humanities	Portuguese, Spanish; Castilian	http://www.scielo.br/revistas/ea/iedboard.htm	Double blind peer review	http://www.scielo.br/revistas/ea/iinstruc.htm	http://www.scielo.br/revistas/ea/iaboutj.htm	http://www.scielo.br/revistas/ea/iinstruc.htm			3	http://www.scielo.br/revistas/ea/isubscrp.htm	Yes	http://www.scielo.br/scielo.php?script=sci_arttext&pid=S0103-40142015000200043&lng=en&nrm=iso&tlng=pt	CC BY-NC		http://www.scielo.br/revistas/ea/iaboutj.htm	Yes		False
Alimentos e Nutrição	http://serv-bib.fcfar.unesp.br/seer/index.php/alimentos	Brazilian Journal of Food and Nutrition	0103-4235	2179-4448	Universidade Estadual Paulista		OJS	Brazil	No	http://serv-bib.fcfar.unesp.br/seer/index.php/alimentos/about/submissions#authorGuidelines				http://serv-bib.fcfar.unesp.br/seer/index.php/alimentos/about/submissions#authorGuidelines									Cariniana Network	http://serv-bib.fcfar.unesp.br/seer/index.php/alimentos/about/submissions#authorGuidelines	Yes				1989	PDF	food and beverages, food technology, food chemistry, human nutrition	English, Portuguese, Spanish; Castilian	http://serv-bib.fcfar.unesp.br/seer/index.php/alimentos/about/editorialTeam	Peer review	http://serv-bib.fcfar.unesp.br/seer/index.php/alimentos/about/editorialPolicies#peerReviewProcess	http://serv-bib.fcfar.unesp.br/seer/index.php/alimentos/about/editorialPolicies#focusAndScope	http://serv-bib.fcfar.unesp.br/seer/index.php/alimentos/about/submissions#authorGuidelines			25	http://serv-bib.fcfar.unesp.br/seer/index.php/alimentos/about/editorialPolicies#openAccessPolicy			CC BY-NC-ND		http://serv-bib.fcfar.unesp.br/seer/index.php/alimentos/index	Yes	Sherpa/Romeo	False
Classica, Revista Brasileira de Estudos Clássicos	https://revista.classica.org.br	Classica	0103-4316	2176-6436	Sociedade Brasileira de Estudos Clássicos (SBEC)	Sociedade Brasileira de Estudos Clássicos (SBEC)	OJS	Brazil	No	https://revista.classica.org.br/classica/about/editorialPolicies#peerReviewProcess				https://revista.classica.org.br/classica/about/editorialPolicies#peerReviewProcess											Yes	DOI	Yes	https://revista.classica.org.br/classica/article/view/426	2012	PDF	classical studies, history, literature, linguistics, philosophy	English, French, Italian, Portuguese, Spanish; Castilian	https://revista.classica.org.br/classica/about/editorialTeam	Double blind peer review	https://revista.classica.org.br/classica/about/editorialPolicies#peerReviewProcess	https://revista.classica.org.br/classica/about/editorialPolicies#focusAndScope	https://revista.classica.org.br/classica/about/submissions#authorGuidelines			20	https://revista.classica.org.br/classica/about/editorialPolicies#openAccessPolicy			CC BY		https://revista.classica.org.br/classica/about/submissions#copyrightNotice	Yes	Diadorim	True
Caderno CRH	http://www.scielo.br/scielo.php?script=sci_serial&pid=0103-4979&lng=en&nrm=iso		0103-4979	1983-8239	Universidade Federal da Bahia - Faculdade de Filosofia e Ciências Humanas - Centro de Recursos Humanos	Universidade Federal da Bahia	SciELO Brazil	Brazil	No	http://www.scielo.br/revistas/ccrh/iinstruc.htm				http://www.scielo.br/revistas/ccrh/iinstruc.htm											Yes	DOI			2008	PDF, HTML, XML	social conditions, social science, Brazil, demography, sociology	English, Portuguese, Spanish; Castilian	http://www.scielo.br/revistas/ccrh/iedboard.htm	Peer review	http://www.scielo.br/revistas/ccrh/iinstruc.htm	http://www.scielo.br/revistas/ccrh/iinstruc.htm	http://www.scielo.br/revistas/ccrh/iinstruc.htm			6	http://www.scielo.br/revistas/ccrh/isubscrp.htm	Yes	http://www.scielo.br/scielo.php?script=sci_arttext&pid=S0103-49792015000200267&lng=en&nrm=iso&tlng=pt	CC BY		http://www.scielo.br/revistas/ccrh/iaboutj.htm	Yes		False
Journal of the Brazilian Chemical Society	http://jbcs.sbq.org.br/home		0103-5053	1678-4790	Sociedade Brasileira de Química	Sociedade Brasileira de Química	SciELO Brazil	Brazil	Yes	http://jbcs.sbq.org.br/open_access	1450	BRL - Brazilian Real		http://jbcs.sbq.org.br/open_access							CLOCKSS			http://jbcs.sbq.org.br/home	Yes	DOI			1990	PDF, HTML, ePUB, XML	analytic chemistry, physical chemistry, organic chemistry, inorganic chemistry, nano chemistry	English	http://jbcs.sbq.org.br/advisory_board	Peer review	http://jbcs.sbq.org.br/about_JBCS	http://jbcs.sbq.org.br/about_JBCS	http://jbcs.sbq.org.br/instr.authors	Yes	http://jbcs.sbq.org.br/conteudo.asp?page=14#1.4	12	http://jbcs.sbq.org.br/open_access			CC BY		http://jbcs.sbq.org.br/about_JBCS	Yes		False
Revista Brasileira de Terapia Intensiva	http://www.scielo.br/scielo.php?script=sci_serial&pid=0103-507X&lng=en&nrm=iso		0103-507X	1982-4335	Associação de Medicina Intensiva Brasileira		SciELO Brazil	Brazil	No	http://www.scielo.br/revistas/rbti/iinstruc.htm#02				http://www.scielo.br/revistas/rbti/iinstruc.htm#02										http://www.scielo.br/revistas/rbti/iinstruc.htm	Yes		Yes		2006	PDF, HTML, XML	intensive medicine, intensive care, evidencebased medicine, emergency care	English, Portuguese, Spanish; Castilian	http://www.scielo.br/revistas/rbti/iedboard.htm	Peer review	http://www.scielo.br/revistas/rbti/iinstruc.htm	http://www.scielo.br/revistas/rbti/iinstruc.htm	http://www.scielo.br/revistas/rbti/iinstruc.htm	Yes	http://www.scielo.br/revistas/rbti/iinstruc.htm	15	http://www.scielo.br/revistas/rbti/isubscrp.htm	Yes	http://www.scielo.br/scielo.php?script=sci_arttext&pid=S0103-507X2015000200119&lng=en&nrm=iso&tlng=en	CC BY-NC		http://www.scielo.br/revistas/rbti/isubscrp.htm	Yes		False
Brazilian Neurosurgery	http://www.thieme.com/bns	Arquivos Brasileiros de Neurocirurgia	0103-5355	2359-5922	Thieme Revinter Publicações	Brazilian Society of Neurosurgery		Brazil	No	http://www.thieme.com/media/ita/BNS_authors_instructions_eng.pdf				http://www.thieme.com/media/ita/BNS_authors_instructions_eng.pdf							LOCKSS, CLOCKSS, Portico			http://www.thieme-connect.com		DOI		http://www.thieme-connect.com/products/ejournals/journal/10.1055/s-00028832	2015	PDF, HTML	neurosurgery	English	http://www.thieme.de/de/brazilian-neurosurgery/73030.htm	Double blind peer review	http://www.thieme.com/media/ita/BNS_authors_instructions_eng.pdf	http://www.thieme.com/bns	http://www.thieme.com/media/ita/BNS_authors_instructions_eng.pdf	Yes	http://open.thieme.com/web/19/faq	12	http://www.thieme.com/bns			CC BY-NC-ND		http://www.thieme.com/bns	Yes	Sherpa/Romeo	False
Psico	http://revistaseletronicas.pucrs.br/revistapsico/ojs/index.php/revistapsico		0103-5371	1980-8623	Editora da Pontifícia Universidade Católica do Rio Grande do Sul (EDIPUCRS)	Pontifícia Universidade Católica do Rio Grande do Sul	OJS	Brazil	No	http://revistaseletronicas.pucrs.br/revistapsico/ojs/index.php/revistapsico/about/editorialPolicies#custom-8				http://revistaseletronicas.pucrs.br/revistapsico/ojs/index.php/revistapsico/about/editorialPolicies#custom-8								Biblioteca Nacional do Brasil		http://revistaseletronicas.pucrs.br/revistapsico/ojs/index.php/revistapsico/about/editorialPolicies#archiving	Yes	DOI			2005	PDF	psychology	English, Portuguese, Spanish; Castilian	http://revistaseletronicas.pucrs.br/revistapsico/ojs/index.php/revistapsico/about/editorialTeam	Double blind peer review	http://revistaseletronicas.pucrs.br/revistapsico/ojs/index.php/revistapsico/about/editorialPolicies#peerReviewProcess	http://revistaseletronicas.pucrs.br/revistapsico/ojs/index.php/revistapsico/about/editorialPolicies#focusAndScope	http://revistaseletronicas.pucrs.br/revistapsico/ojs/index.php/revistapsico/about/submissions#authorGuidelines			10	http://revistaseletronicas.pucrs.br/revistapsico/ojs/index.php/revistapsico/about/editorialPolicies#openAccessPolicy	Yes	http://revistaseletronicas.pucrs.br/revistapsico/ojs/index.php/revistapsico/article/view/15155/12471	CC BY		http://revistaseletronicas.pucrs.br/ojs/index.php/revistapsico/about/submissions#copyrightNotice	Yes	Sherpa/Romeo	False
Nova Economia	http://revistas.face.ufmg.br/index.php/novaeconomia		0103-6351		Universidade Federal de Minas Gerais	Universidade Federal de Minas Gerais, Departamento de Ciências Econômicas	OJS	Brazil	No	http://revistas.face.ufmg.br/index.php/novaeconomia/about/editorialPolicies#custom-0				http://revistas.face.ufmg.br/index.php/novaeconomia/about/editorialPolicies#custom-0							CLOCKSS			http://revistas.face.ufmg.br/index.php/novaeconomia/about/editorialPolicies	Yes				1990	PDF, HTML, XML	economics	English, Portuguese, Spanish; Castilian	http://revistas.face.ufmg.br/index.php/novaeconomia/about/editorialTeam	Peer review	http://revistas.face.ufmg.br/index.php/novaeconomia/about/editorialPolicies#peerReviewProcess	http://revistas.face.ufmg.br/index.php/novaeconomia/about/editorialPolicies	http://revistas.face.ufmg.br/index.php/novaeconomia/about/submissions			53	http://revistas.face.ufmg.br/index.php/novaeconomia/about/editorialPolicies#openAccessPolicy	Yes	http://revistas.face.ufmg.br/index.php/novaeconomia/article/view/1746/1598	CC BY		http://revistas.face.ufmg.br/index.php/novaeconomia	Yes	Sherpa/Romeo	True
Bolema	http://www.periodicos.rc.biblioteca.unesp.br/index.php/bolema/index	Bolema: Boletim de Educação Matemática	0103-636X	1980-4415	Universidade Estadual Paulista		OJS	Brazil	No	http://www.periodicos.rc.biblioteca.unesp.br/index.php/bolema/about/editorialPolicies#custom-1				http://www.periodicos.rc.biblioteca.unesp.br/index.php/bolema/about/editorialPolicies#custom-1															1985	PDF, HTML, XML	mathematics education, education	English, Portuguese, Spanish; Castilian	http://www.periodicos.rc.biblioteca.unesp.br/index.php/bolema/about/editorialTeam	Peer review	http://www.periodicos.rc.biblioteca.unesp.br/index.php/bolema/about/editorialPolicies#peerReviewProcess	http://www.periodicos.rc.biblioteca.unesp.br/index.php/bolema/about/editorialPolicies#focusAndScope	http://www.periodicos.rc.biblioteca.unesp.br/index.php/bolema/about/submissions#authorGuidelines			15	http://www.periodicos.rc.biblioteca.unesp.br/index.php/bolema/about/editorialPolicies#openAccessPolicy	Yes	http://www.periodicos.rc.biblioteca.unesp.br/index.php/bolema/article/view/9937/7277	CC BY		http://www.periodicos.rc.biblioteca.unesp.br/index.php/bolema/about/submissions#copyrightNotice	Yes		False
Brazilian Dental Journal	http://www.scielo.br/scielo.php?script=sci_serial&pid=0103-6440&lng=en&nrm=iso		0103-6440	1806-4760	Fundação Odontológica de Ribeirão Preto		SciELO Brazil	Brazil	Yes	http://www.scielo.br/revistas/bdj/iinstruc.htm	550	BRL - Brazilian Real		http://www.scielo.br/revistas/bdj/iinstruc.htm											Yes	DOI	Yes	http://www.scielo.br/scielo.php?script=sci_arttext&pid=S0103-64402014000400282&lng=en&nrm=iso&tlng=en	2002	PDF, HTML	dentistry, endodontic	English	http://www.scielo.br/revistas/bdj/iedboard.htm	Peer review	http://www.scielo.br/revistas/bdj/iedboard.htm	http://www.scielo.br/revistas/bdj/pinstruc.htm	http://www.scielo.br/revistas/bdj/iinstruc.htm	Yes	http://www.scielo.br/revistas/bdj/pinstruc.htm	12	http://www.scielo.br/revistas/bdj/isubscrp.htm			CC BY		http://www.scielo.br/revistas/bdj/paboutj.htm	Yes		False
Production	http://www.scielo.br/scielo.php/script_sci_serial/pid_0103-6513/lng_en/nrm_iso	Revista Produção	0103-6513	1980-5411	Associação Brasileira de Engenharia de Produção (ABEPRO)		SciELO Brazil	Brazil	No	http://www.scielo.br/revistas/prod/iinstruc.htm				http://www.scielo.br/revistas/prod/iinstruc.htm											Yes	DOI	Yes	http://www.scielo.br/statjournal.php?lang=en&issn=0103-6513	1991	PDF, HTML, XML	production engineering, production management, quality control	English	http://www.scielo.br/revistas/prod/iedboard.htm	Double blind peer review	http://www.scielo.br/revistas/prod/iinstruc.htm	http://www.scielo.br/revistas/prod/iinstruc.htm	http://www.scielo.br/revistas/prod/iinstruc.htm			40	http://www.scielo.br/revistas/prod/iaboutj.htm	Yes	http://www.scielo.br/scielo.php?script=sci_arttext&pid=S0103-65132015000100079&lng=en&nrm=iso&tlng=pt	CC BY-NC		http://www.scielo.br/scielo.php/script_sci_serial/pid_0103-6513/lng_en/nrm_iso	Yes		False
Psicologia USP	http://www.scielo.br/scielo.php?script=sci_serial&pid=0103-6564&lng=en&nrm=iso	Psicologia Universidade de São Paulo	0103-6564	1678-5177	Universidade de São Paulo	Universidade de São Paulo, Instituto de Psicologia	SciELO Brazil	Brazil	No	http://www.scielo.br/revistas/pusp/iinstruc.htm#006				http://www.scielo.br/revistas/pusp/iinstruc.htm#006											Yes	DOI	Yes	http://www.scielo.br/statjournal.php?lang=en&issn=0103-6564	1997	PDF, HTML, XML	psychology	English, French, Portuguese, Spanish; Castilian	http://www.scielo.br/revistas/pusp/iedboard.htm	Double blind peer review	http://www.scielo.br/revistas/pusp/iinstruc.htm	http://www.scielo.br/revistas/pusp/iinstruc.htm	http://www.scielo.br/revistas/pusp/iinstruc.htm			32	http://www.scielo.br/revistas/pusp/isubscrp.htm	Yes	http://www.scielo.br/scielo.php?script=sci_arttext&pid=S0103-65642015000100037&lng=en&nrm=iso&tlng=pt	CC BY-NC		http://www.scielo.br/scielo.php?script=sci_serial&pid=0103-6564&lng=en&nrm=iso	Yes		False
Estudos em Avaliação Educacional	http://publicacoes.fcc.org.br/ojs/index.php/eae/index		0103-6831	1984-932X	Fundação Carlos Chagas		OJS	Brazil	No	http://publicacoes.fcc.org.br/ojs/index.php/eae/about/submissions#authorGuidelines				http://publicacoes.fcc.org.br/ojs/index.php/eae/about/submissions#authorGuidelines								Biblioteca Nacional do Brasil		https://www.bn.br/sobre-bn/deposito-legal	Yes	DOI			1994	PDF, XML	educational evaluation, educational policies, quality of teaching	Portuguese	http://publicacoes.fcc.org.br/ojs/index.php/eae/about/editorialTeam	Peer review	http://publicacoes.fcc.org.br/ojs/index.php/eae/about/submissions	http://publicacoes.fcc.org.br/ojs/index.php/eae/about/editorialPolicies#focusAndScope	http://publicacoes.fcc.org.br/ojs/index.php/eae/about/submissions#authorGuidelines			6	http://publicacoes.fcc.org.br/ojs/index.php/eae/about/editorialPolicies#openAccessPolicy			CC BY-NC		http://publicacoes.fcc.org.br/ojs/index.php/eae/about/submissions#copyrightNotice	Yes	Diadorim	True
RGO: Revista Gaúcha de Odontologia	http://www.scielo.br/rgo		0103-6971	1981-8637	Faculdade São Leopoldo Mandic	Faculdade São Leopoldo Mandic	SciELO Brazil	Brazil	No	http://www.scielo.br/revistas/rgo/iinstruc.htm#04				http://www.scielo.br/revistas/rgo/iinstruc.htm#04										http://www.scielo.br/scielo.php?script=sci_serial&pid=1981-8637&lng=pt&nrm=iso	Yes	DOI	Yes	http://www.scielo.br/statjournal.php?lang=pt&issn=1981-8637	2014	PDF, HTML, XML	public health, clinical dentistry, odontology	English	http://www.scielo.br/revistas/rgo/pedboard.htm	Double blind peer review	http://www.scielo.br/revistas/rgo/pinstruc.htm	http://www.scielo.br/revistas/rgo/pinstruc.htm#01	http://www.scielo.br/revistas/rgo/pinstruc.htm			20	http://www.scielo.br/revistas/rgo/isubscrp.htm	Yes	http://www.scielo.br/scielo.php?script=sci_arttext&pid=S1981-86372014000100013&lng=en&nrm=iso&tlng=en	CC BY		http://www.scielo.br/revistas/rgo/isubscrp.htm			False
Signótica	http://www.revistas.ufg.br/index.php/sig/index	Signotica (UFG)	0103-7250	2316-3690	Federal University of Goiás	Federal University of Goiás	OJS	Brazil	No	http://revistas.ufg.emnuvens.com.br/sig/about				http://revistas.ufg.emnuvens.com.br/sig/about							LOCKSS			http://revistas.ufg.emnuvens.com.br/sig/about/editorialPolicies#archiving		DOI			1987	PDF	Linguistics, Literature, Applied Linguistics	English, French, Italian, Portuguese, Spanish; Castilian	http://revistas.ufg.emnuvens.com.br/sig/about	Double blind peer review	http://revistas.ufg.emnuvens.com.br/sig/about/editorialPolicies#peerReviewProcess	http://revistas.ufg.emnuvens.com.br/sig/about/editorialPolicies#focusAndScope	http://revistas.ufg.emnuvens.com.br/sig/about/submissions#authorGuidelines			28	http://revistas.ufg.emnuvens.com.br/sig/about/editorialPolicies#openAccessPolicy	Yes	http://revistas.ufg.emnuvens.com.br/sig/about/editorialPolicies	CC BY		http://revistas.ufg.emnuvens.com.br/sig/about/editorialPolicies	Yes		True
Pro-Posições	http://www.scielo.br/scielo.php?script=sci_serial&pid=0103-7307&lng=en&nrm=iso		0103-7307	1980-6248	Universidade Estadual de Campinas	Universidade Estadual de Campinas, Faculdade de Educação	SciELO Brazil	Brazil	No	http://www.scielo.br/revistas/pp/iinstruc.htm#002				http://www.scielo.br/revistas/pp/iinstruc.htm#002											Yes	DOI	Yes	http://www.scielo.br/statjournal.php?lang=en&issn=0103-7307	2008	PDF, HTML, XML	higher education, migration, education history, pedagogy	English, French, German, Italian, Portuguese, Spanish; Castilian	http://www.scielo.br/revistas/pp/iedboard.htm	Blind peer review	http://www.scielo.br/revistas/pp/iinstruc.htm	http://www.scielo.br/revistas/pp/iinstruc.htm	http://www.scielo.br/revistas/pp/iinstruc.htm	Yes	http://www.scielo.br/revistas/pp/iinstruc.htm#002	24	http://www.scielo.br/revistas/pp/iaboutj.htm	Yes	http://www.scielo.br/scielo.php?script=sci_arttext&pid=S0103-73072015000100069&lng=en&nrm=iso&tlng=pt	CC BY-NC		http://www.scielo.br/revistas/pp/iaboutj.htm	Yes		False
Physis	http://www.scielo.br/scielo.php/script_sci_serial/lng_pt/pid_0103-7331/nrm_iso		0103-7331		Universidade do Estado do Rio de Janeiro	Universidade do Estado do Rio de Janeiro, Instituto de Medicina Social	SciELO Brazil	Brazil	No	http://www.scielo.br/revistas/physis/iinstruc.htm				http://www.scielo.br/revistas/physis/iinstruc.htm											Yes	DOI	Yes	http://www.scielo.br/statjournal.php?lang=en&issn=0103-7331	1991	PDF, HTML, XML	collective health, social sciences, health politics	English, Portuguese, Spanish; Castilian	http://www.scielo.br/revistas/physis/iedboard.htm	Double blind peer review	http://www.scielo.br/revistas/physis/iinstruc.htm	http://www.scielo.br/revistas/physis/iinstruc.htm	http://www.scielo.br/revistas/physis/iinstruc.htm			28	http://www.scielo.br/revistas/physis/isubscrp.htm	Yes	http://www.scielo.br/scielo.php?script=sci_arttext&pid=S0103-73312014000401079&lng=en&nrm=iso&tlng=pt	CC BY-NC		http://www.scielo.br/revistas/physis/paboutj.htm	Yes		False
Opus	http://www.anppom.com.br/revista/index.php/opus		0103-7412	1517-7017	Associação Nacional de Pesquisa e Pós-Graduação em Música	Associação Nacional de Pesquisa e Pós-Graduação em Música	OJS	Brazil	No	http://www.anppom.com.br/revista/index.php/opus/about/editorialPolicies#custom-2				http://www.anppom.com.br/revista/index.php/opus/about/editorialPolicies#custom-2										http://www.anppom.com.br/revista/index.php/opus/about/editorialPolicies#archiving	Yes	DOI			2009	PDF	musical education, ethnomusicology, musicology, music research, composition	Portuguese	http://www.anppom.com.br/revista/index.php/opus/about/editorialTeam	Double blind peer review	http://www.anppom.com.br/revista/index.php/opus/about/editorialPolicies#peerReviewProcess	http://www.anppom.com.br/revista/index.php/opus/about/editorialPolicies#focusAndScope	http://www.anppom.com.br/revista/index.php/opus/about/submissions#authorGuidelines	Yes	http://www.anppom.com.br/revista/index.php/opus/about/editorialPolicies#custom-1	21	http://www.anppom.com.br/revista/index.php/opus/about/editorialPolicies#openAccessPolicy			CC BY-NC		http://www.anppom.com.br/revista/index.php/opus/about/editorialPolicies#custom-3	Yes		False
Revista Espaço	http://www.ines.gov.br/seer/index.php/revista-espaco/index		0103-7668	2525-6203	Instituto Nacional de Educação de Surdos	Instituto Nacional de Educação de Surdos	OJS	Brazil	No	http://www.ines.gov.br/seer/index.php/revista-espaco/about/editorialPolicies#custom-0				http://www.ines.gov.br/seer/index.php/revista-espaco/about/editorialPolicies#custom-0										http://www.ines.gov.br/seer/index.php/revista-espaco/about/editorialPolicies#archiving	Yes				2013	PDF	education, special education, bilingual education, sign language, deaf culture	English, Portuguese, Spanish; Castilian	http://www.ines.gov.br/seer/index.php/revista-espaco/about/editorialTeam	Peer review	http://www.ines.gov.br/seer/index.php/revista-espaco/about/editorialPolicies#peerReviewProcess	http://www.ines.gov.br/seer/index.php/revista-espaco/about/editorialPolicies#focusAndScope	http://www.ines.gov.br/seer/index.php/revista-espaco/about/submissions#onlineSubmissions			24	http://www.ines.gov.br/seer/index.php/revista-espaco/about/editorialPolicies#openAccessPolicy			CC BY		http://www.ines.gov.br/seer/index.php/revista-espaco/about/editorialPolicies#openAccessPolicy	Yes		False
Estudos de Religião	https://www.metodista.br/revistas/revistas-ims/index.php/ER		0103-801X	2176-1078	Universidade Metodista de São Paulo	Universidade Metodista de São Paulo, Faculdade de Humanidades e Direito, Programa de Pós-Graduação em Ciências da Religião		Brazil	No	https://www.metodista.br/revistas/revistas-ims/index.php/ER/about/submissions#onlineSubmissions				https://www.metodista.br/revistas/revistas-ims/index.php/ER/about/submissions#onlineSubmissions							LOCKSS			https://www.metodista.br/revistas/revistas-ims/index.php/ER/about/editorialPolicies#archiving	Yes	DOI			2007	PDF	sociology of religion, theology, religious studies	Portuguese, Spanish; Castilian	https://www.metodista.br/revistas/revistas-ims/index.php/ER/about/editorialTeam	Double blind peer review	https://www.metodista.br/revistas/revistas-ims/index.php/ER/about/editorialPolicies#peerReviewProcess	https://www.metodista.br/revistas/revistas-ims/index.php/ER/about/editorialPolicies#focusAndScope	https://www.metodista.br/revistas/revistas-ims/index.php/ER/about/submissions#authorGuidelines			24	https://www.metodista.br/revistas/revistas-ims/index.php/ER/about/editorialPolicies#openAccessPolicy			CC BY		https://www.metodista.br/revistas/revistas-ims/index.php/ER/about/submissions#copyrightNotice	Yes		True
Caderno de Geografia	http://periodicos.pucminas.br/index.php/geografia/index		0103-8427	2318-2962	Pontifícia Universidade Católica de Minas Gerais		OJS	Brazil	No	http://periodicos.pucminas.br/index.php/geografia/about/editorialPolicies#custom-11				http://periodicos.pucminas.br/index.php/geografia/about/editorialPolicies#custom-11										http://periodicos.pucminas.br/index.php/geografia/about/editorialPolicies#custom-0	Yes	DOI			2010	PDF	geography	English, Portuguese, Spanish; Castilian	http://periodicos.pucminas.br/index.php/geografia/about/editorialTeam	Double blind peer review	http://periodicos.pucminas.br/index.php/geografia/about/editorialPolicies#peerReviewProcess	http://periodicos.pucminas.br/index.php/geografia/about/editorialPolicies#focusAndScope	http://periodicos.pucminas.br/index.php/geografia/about/submissions#authorGuidelines			8	http://periodicos.pucminas.br/index.php/geografia/about/editorialPolicies#openAccessPolicy		http://periodicos.pucminas.br/index.php/geografia/article/view/P.2318-2962.2015v25n44p1	CC BY-NC		http://periodicos.pucminas.br/index.php/geografia/about/editorialPolicies#custom-0	Yes		True
Revista Brasileira de Parasitologia Veterinária	http://www.scielo.br/scielo.php?script=sci_serial&pid=1984-2961&lng=en&nrm=iso	Brazilian Journal of Veterinary Parasitology	0103-846X	1984-2961	Colégio Brasileiro de Parasitologia Veterinaria		SciELO Brazil	Brazil	Yes	http://www.scielo.br/revistas/rbpv/iinstruc.htm#01	500	BRL - Brazilian Real		http://www.scielo.br/revistas/rbpv/iinstruc.htm#01										http://www.scielo.br/revistas/rbpv/iinstruc.htm	Yes	DOI			2007	PDF, XML	veterinary medicine, veterinary parasitology, animal health, helminthology, parasitic control, protozoology	English, Portuguese, Spanish; Castilian	http://www.scielo.br/revistas/rbpv/iedboard.htm	Blind peer review	http://www.scielo.br/revistas/rbpv/iinstruc.htm	http://www.scielo.br/revistas/rbpv/iinstruc.htm	http://www.scielo.br/revistas/rbpv/iinstruc.htm			11	http://www.scielo.br/revistas/rbpv/isubscrp.htm	Yes	http://www.scielo.br/scielo.php?script=sci_arttext&pid=S1984-29612015000200136&lng=en&nrm=iso&tlng=en	CC BY		http://www.scielo.br/scielo.php?script=sci_serial&pid=1984-2961&lng=en&nrm=iso	Yes		False
Ciência Rural	http://www.scielo.br/scielo.php?pid=0103-8478&script=sci_serial		0103-8478	1678-4596	Universidade Federal de Santa Maria	Universidade Federal de Santa Maria	SciELO Brazil	Brazil	Yes	http://www.scielo.br/revistas/cr/iinstruc.htm	700	BRL - Brazilian Real	Yes	http://www.scielo.br/revistas/cr/iinstruc.htm	80	BRL - Brazilian Real					CLOCKSS			http://thekeepers.org/	Yes	DOI			1995	PDF, ePDF	agricultural sciences, economic growth, development, agronomy, animal science	English, Portuguese	http://www.scielo.br/revistas/cr/iedboard.htm	Peer review	http://www.scielo.br/revistas/cr/isubscrp.htm	http://www.scielo.br/scielo.php?script=sci_serial&lng=en&pid=0103-8478&nrm=iso	http://www.scielo.br/revistas/cr/iinstruc.htm			16	http://www.scielo.br/revistas/cr/isubscrp.htm			CC BY-NC		http://www.scielo.br/revistas/cr/iaboutj.htm	Yes		False
Paidéia (Ribeirão Preto)	http://www.scielo.br/scielo.php?script=sci_serial&pid=0103-863X&lng=en&nrm=iso		0103-863X	1982-4327	Universidade de São Paulo		SciELO Brazil	Brazil	No	http://www.scielo.br/revistas/paideia/iinstruc.htm#007				http://www.scielo.br/revistas/paideia/iinstruc.htm#007											Yes	DOI	Yes	http://www.scielo.br/statjournal.php?lang=en&issn=0103-863X	1993	PDF, HTML, XML	behavioral science, applied psychology, sociology	English, Portuguese, Spanish; Castilian	http://www.scielo.br/revistas/paideia/iedboard.htm	Blind peer review	http://www.scielo.br/revistas/paideia/iinstruc.htm	http://www.scielo.br/revistas/paideia/iinstruc.htm	http://www.scielo.br/revistas/paideia/iinstruc.htm			36	http://www.scielo.br/revistas/paideia/isubscrp.htm	Yes	http://www.scielo.br/scielo.php?script=sci_arttext&pid=S0103-863X2015000100029&lng=en&nrm=iso&tlng=en	CC BY-NC		http://www.scielo.br/scielo.php?script=sci_serial&pid=0103-863X&lng=en&nrm=iso	Yes		False
Reflexão & Ação	http://online.unisc.br/seer/index.php/reflex/index	Reflexao e Acao	0103-8842	1982-9949	Editora da Universidade de Santa Cruz do Sul	Universidade de Santa Cruz do Sul	OJS	Brazil	No	http://online.unisc.br/seer/index.php/reflex/about/editorialPolicies#peerReviewProcess				http://online.unisc.br/seer/index.php/reflex/about/editorialPolicies#peerReviewProcess										http://online.unisc.br/seer/index.php/reflex/about/editorialPolicies#archiving	Yes	DOI			2007	PDF	pedagogy, teaching, learning	Portuguese	http://online.unisc.br/seer/index.php/reflex/about/editorialTeam	Peer review	http://online.unisc.br/seer/index.php/reflex/about/editorialPolicies#peerReviewProcess	http://online.unisc.br/seer/index.php/reflex/about/editorialPolicies#focusAndScope	http://online.unisc.br/seer/index.php/reflex/about/submissions#authorGuidelines			24	http://online.unisc.br/seer/index.php/reflex/about/editorialPolicies#openAccessPolicy		http://online.unisc.br/seer/index.php/reflex/about/submissions#copyrightNotice	CC BY		http://online.unisc.br/seer/index.php/reflex/about/submissions#copyrightNotice	Yes	Diadorim	False
Scientia Agricola	http://www.scielo.br/sa		0103-9016	1678-992X	Universidade de São Paulo	Escola Superior de Agricultura	SciELO Brazil	Brazil	Yes	http://www.scielo.br/revistas/sa/iinstruc.htm	560	USD - US Dollar		http://www.scielo.br/revistas/sa/iinstruc.htm										http://www.scielo.br/revistas/sa/iinstruc.htm	Yes				1992	PDF, HTML, XML	agricultural sciences	English, Portuguese, Spanish; Castilian	http://www.scielo.br/revistas/sa/iedboard.htm	Peer review	http://www.scielo.br/revistas/sa/iinstruc.htm	http://www.scielo.br/revistas/sa/iinstruc.htm	http://www.scielo.br/revistas/sa/iinstruc.htm			16	http://www.scielo.br/revistas/sa/isubscrp.htm	Yes	http://www.scielo.br/scielo.php?script=sci_arttext&pid=S0103-90162015000500393&lng=en&nrm=iso&tlng=en	CC BY		http://www.scielo.br/revistas/sa/isubscrp.htm	Yes		False
Boletim do Museu de Biologia Mello Leitão	http://boletim.inma.sambio.org.br/		0103-9121	2318-9444	Museu de Biologia Mello Leitão	Instituto Nacional da Mata Atlântica	OJS	Brazil	No	http://boletim.inma.sambio.org.br/index.php/boletim_mbml/about/submissions#authorGuidelines				http://boletim.inma.sambio.org.br/index.php/boletim_mbml/about/submissions#authorGuidelines															1992	PDF	Atlantic Forest (Mata Atlântica), biology, botanics, zoology	English, Portuguese, Spanish; Castilian	http://boletim.inma.sambio.org.br/index.php/boletim_mbml/about/editorialTeam	Double blind peer review	http://boletim.inma.sambio.org.br/index.php/boletim_mbml/about/editorialPolicies#peerReviewProcess	http://boletim.inma.sambio.org.br/index.php/boletim_mbml/about/editorialPolicies#focusAndScope	http://boletim.inma.sambio.org.br/index.php/boletim_mbml/about/submissions#authorGuidelines			30	http://boletim.inma.sambio.org.br/index.php/boletim_mbml/about/editorialPolicies#openAccessPolicy		http://www.boletimmbml.net/boletim/index.php/boletim_mbml/about/submissions#copyrightNotice	CC BY		http://boletim.inma.sambio.org.br/index.php/boletim_mbml/about/submissions#copyrightNotice	Yes		True
Revista Acadêmica	https://periodicos.pucpr.br/index.php/cienciaanimal/	Revista Acadêmica, Ciência Animal	0103-989X	1981-4178	Editora Universitária Champagnat	Pontificia Universidade Católica Do Paraná	OJS	Brazil	No	https://periodicos.pucpr.br/index.php/cienciaanimal/index				https://periodicos.pucpr.br/index.php/cienciaanimal/index											Yes				2003	PDF	animal science, veterinary, zootechny	English, Portuguese	https://periodicos.pucpr.br/index.php/cienciaanimal/about/editorialTeam	Peer review	https://periodicos.pucpr.br/index.php/cienciaanimal/about/editorialPolicies#peerReviewProcess	https://periodicos.pucpr.br/index.php/cienciaanimal/about/editorialPolicies#focusAndScope	https://periodicos.pucpr.br/index.php/cienciaanimal/about/submissions#authorGuidelines			8	https://periodicos.pucpr.br/index.php/cienciaanimal/about/editorialPolicies#openAccessPolicy			CC BY		https://periodicos.pucpr.br/index.php/cienciaanimal/about/editorialPolicies#openAccessPolicy	Yes		False
Ciência Florestal	http://cascavel.ufsm.br/revistas/ojs-2.2.2/index.php/cienciaflorestal		0103-9954	1980-5098	Universidade Federal de Santa Maria	Universidade Federal de Santa Maria, Centro de Pesquisas Florestais	OJS	Brazil	Yes	http://cascavel.ufsm.br/revistas/ojs-2.2.2/index.php/cienciaflorestal/about/submissions#authorGuidelines	250	BRL - Brazilian Real	Yes	http://cascavel.ufsm.br/revistas/ojs-2.2.2/index.php/cienciaflorestal/about/submissions	50	BRL - Brazilian Real					LOCKSS, CLOCKSS			http://cascavel.ufsm.br/revistas/ojs-2.2.2/index.php/cienciaflorestal/about/editorialPolicies#archiving	Yes				1991	PDF	forestry, silviculture, forest ecology, forest management, wood-technology	Portuguese	http://cascavel.ufsm.br/revistas/ojs-2.2.2/index.php/cienciaflorestal/about/editorialTeam	Peer review	http://cascavel.ufsm.br/revistas/ojs-2.2.2/index.php/cienciaflorestal/about/editorialPolicies#peerReviewProcess	http://periodicos.ufsm.br/cienciaflorestal/about/editorialPolicies#focusAndScope	http://cascavel.ufsm.br/revistas/ojs-2.2.2/index.php/cienciaflorestal/about/submissions#authorGuidelines			53	http://periodicos.ufsm.br/cienciaflorestal/about/editorialPolicies#openAccessPolicy	Yes	http://periodicos.ufsm.br/cienciaflorestal/article/view/17465	CC BY-NC		http://cascavel.ufsm.br/revistas/ojs-2.2.2/index.php/cienciaflorestal/about/submissions#privacyStatement	Yes	Diadorim	False
Brazilian Journal of Anesthesiology	https://www.journals.elsevier.com/brazilian-journal-of-anesthesiology-english-edition/	Brazilian Journal of Anesthesiology (English edition)	0104-0014		Elsevier	Sociedade Brasileira de Anestesiologia	www.sciencedirect.com	Netherlands	No	https://www.elsevier.com/journals/brazilian-journal-of-anesthesiology-english-edition/0104-0014/open-access-journal				https://www.elsevier.com/journals/brazilian-journal-of-anesthesiology-english-edition/0104-0014/open-access-journal					Yes	http://www.elsevier.com/about/corporate-responsibility/research-4-life/research-4-life-programs	CLOCKSS, Portico	Koninklijke Bibliotheek		https://www.elsevier.com/about/company-information/policies/digital-archive		DOI			2013	PDF, HTML	clinical trials, clinical practice, anesthesiology	English	https://www.journals.elsevier.com/brazilian-journal-of-anesthesiology-english-edition/editorial-board	Peer review	https://www.elsevier.com/journals/brazilian-journal-of-anesthesiology-english-edition/0104-0014/guide-for-authors	https://www.journals.elsevier.com/brazilian-journal-of-anesthesiology-english-edition/	https://www.elsevier.com/journals/brazilian-journal-of-anesthesiology-english-edition/0104-0014/guide-for-authors	Yes	http://www.elsevier.com/editors/perk/plagiarism-detection	51	https://www.elsevier.com/journals/brazilian-journal-of-anesthesiology-english-edition/0104-0014/open-access-journal	Yes	http://www.sciencedirect.com/science/article/pii/S0104001416300586	CC BY-NC-ND		https://www.elsevier.com/journals/brazilian-journal-of-anesthesiology-english-edition/0104-0014/open-access-journal	Yes	Sherpa/Romeo	False
Infarma: Pharmaceutical Sciences	http://revistas.cff.org.br/?journal=infarma	Infarma	0104-0219	2318-9312	Federal Council of Pharmacy	Federal Council of Pharmacy	OJS	Brazil	No	http://revistas.cff.org.br/?journal=infarma&page=about&op=editorialPolicies#focusAndScope				http://revistas.cff.org.br/?journal=infarma&page=about&op=editorialPolicies#focusAndScope										http://revistas.cff.org.br/?journal=infarma&page=about&op=editorialPolicies#archiving	Yes	DOI			1999	PDF, HTML, ePUB	pharmaceutical sciences	English, Portuguese, Spanish; Castilian	http://revistas.cff.org.br/?journal=infarma&page=about&op=editorialTeam	Double blind peer review	http://revistas.cff.org.br/?journal=infarma&page=about&op=editorialPolicies#peerReviewProcess	http://revistas.cff.org.br/?journal=infarma&page=about&op=editorialPolicies#focusAndScope	http://revistas.cff.org.br/?journal=infarma&page=about&op=submissions#authorGuidelines			10	http://revistas.cff.org.br/?journal=infarma&page=about&op=editorialPolicies#focusAndScope	Yes	http://revistas.cff.org.br/?journal=infarma&page=article&op=view&path%5B%5D=712	CC BY		http://revistas.cff.org.br/?journal=infarma&page=about&op=submissions#copyrightNotice	Yes	Sherpa/Romeo	True
Revista Estudos Feministas	http://www.scielo.br/scielo.php/script_sci_serial/pid_0104-026X/lng_pt/nrm_iso		0104-026X		Universidade Federal de Santa Catarina		SciELO Brazil	Brazil	No	http://www.scielo.br/revistas/ref/pinstruc.htm#a04				http://www.scielo.br/revistas/ref/pinstruc.htm#a04										http://www.scielo.br/revistas/ref/pinstruc.htm	Yes	DOI	Yes		2001	PDF, HTML, XML	feminism, gender studies	Portuguese, Spanish; Castilian	http://www.scielo.br/revistas/ref/pedboard.htm	Peer review	http://www.scielo.br/revistas/ref/pinstruc.htm	http://www.scielo.br/revistas/ref/pinstruc.htm	http://www.scielo.br/revistas/ref/pinstruc.htm			16	http://www.scielo.br/revistas/ref/psubscrp.htm	Yes	http://www.scielo.br/scielo.php?script=sci_arttext&pid=S0104-026X2015000200371&lng=pt&nrm=iso&tlng=pt	CC BY		http://www.scielo.br/revistas/ref/psubscrp.htm	Yes		False
Revista de Cultura Teologica	http://revistas.pucsp.br/index.php/culturateo/issue/current		0104-0529	2317-4307	Pontifícia Universidade Católica de São Paulo	Faculdade de Teologia Nossa Senhora da Assunção	OJS	Brazil	Yes	http://revistas.pucsp.br/index.php/culturateo/about/submissions#authorGuidelines	200	BRL - Brazilian Real	Yes	http://revistas.pucsp.br/index.php/culturateo/about/submissions#authorGuidelines	600	BRL - Brazilian Real											Yes	http://revistas.pucsp.br/index.php/culturateo/about/statistics	2013	PDF	Theology, Church, Bible, Tradition, Latin America, Mission	English, French, Portuguese	http://revistas.pucsp.br/index.php/culturateo/about/editorialTeam	Blind peer review	http://revistas.pucsp.br/index.php/culturateo/about/editorialPolicies#peerReviewProcess	http://revistas.pucsp.br/index.php/culturateo/about/editorialPolicies#focusAndScope	http://revistas.pucsp.br/index.php/culturateo/about/submissions#authorGuidelines			16	http://revistas.pucsp.br/index.php/culturateo/about/editorialPolicies#openAccessPolicy			CC BY		http://revistas.pucsp.br/index.php/culturateo/index	Yes		False
Revista de Estudos da Linguagem	http://periodicos.letras.ufmg.br/index.php/relin		0104-0588	2237-2083	Universidade Federal de Minas Gerais		OJS	Brazil	No	http://www.periodicos.letras.ufmg.br/index.php/relin/index				http://www.periodicos.letras.ufmg.br/index.php/relin/index											Yes				1992	PDF	theoretical linguistics, descriptive linguistics, general linguistics	English, Portuguese	http://www.periodicos.letras.ufmg.br/index.php/relin/about/editorialTeam	Double blind peer review	http://www.periodicos.letras.ufmg.br/index.php/relin/about/editorialPolicies#peerReviewProcess	http://www.periodicos.letras.ufmg.br/index.php/relin/about/editorialPolicies#focusAndScope	http://www.periodicos.letras.ufmg.br/index.php/relin/about/submissions#authorGuidelines			52	http://www.periodicos.letras.ufmg.br/index.php/relin/about/editorialPolicies#openAccessPolicy	Yes	http://www.periodicos.letras.ufmg.br/index.php/relin/article/view/6360	CC BY		http://www.periodicos.letras.ufmg.br/index.php/relin/about/editorialPolicies#openAccessPolicy	Yes		True
Economia e Sociedade	http://www.scielo.br/scielo.php?script=sci_serial&pid=0104-0618&lng=en&nrm=iso		0104-0618	1982-3533	Universidade Estadual de Campinas		SciELO Brazil	Brazil	No	http://www.scielo.br/revistas/ecos/iinstruc.htm				http://www.scielo.br/revistas/ecos/iinstruc.htm											Yes	DOI			2007	PDF, HTML, XML	economic theory, applied economy, economic history	English, Portuguese, Spanish; Castilian	http://www.scielo.br/revistas/ecos/iedboard.htm	Double blind peer review	http://www.scielo.br/revistas/ecos/iinstruc.htm	http://www.scielo.br/revistas/ecos/iaboutj.htm	http://www.scielo.br/revistas/ecos/iinstruc.htm			25	http://www.scielo.br/revistas/ecos/isubscrp.htm	Yes	http://www.scielo.br/scielo.php?script=sci_arttext&pid=S0104-06182015000200355&lng=en&nrm=iso&tlng=pt	CC BY		http://www.scielo.br/revistas/ecos/iaboutj.htm	Yes		False
Texto & Contexto Enfermagem	http://www.scielo.br/scielo.php?script=sci_serial&pid=0104-0707&lng=en&nrm=iso		0104-0707	1980-265X	Universidade Federal de Santa Catarina, Programa de Pós Graduação em Enfermagem	Universidade Federal de Santa Catarina, Programa de Pós-Graduação em Enfermagem	SciELO Brazil	Brazil	Yes	http://www.scielo.br/revistas/tce/iinstruc.htm	730	BRL - Brazilian Real	Yes	http://www.scielo.br/revistas/tce/iinstruc.htm	200	BRL - Brazilian Real									Yes		Yes	http://www.scielo.br/statjournal.php?lang=en&issn=0104-0707	2004	PDF, HTML, XML	health care, nursing	English, Portuguese, Spanish; Castilian	http://www.scielo.br/revistas/tce/iedboard.htm	Peer review	http://www.scielo.br/revistas/tce/iinstruc.htm	http://www.scielo.br/revistas/tce/iinstruc.htm	http://www.scielo.br/revistas/tce/iinstruc.htm			24	http://www.scielo.br/revistas/tce/iinstruc.htm#003			CC BY		http://www.scielo.br/revistas/tce/iaboutj.htm#003	Yes		False
Revista Teoria e Evidência Econômica	http://seer.upf.br/index.php/rtee	Brazilian Journal of Theoretical and Applied Economics	0104-0960	2318-8448	Universidade de Passo Fundo	Universidade de Passo Fundo	OJS	Brazil	No	http://seer.upf.br/index.php/rtee/about/submissions#authorGuidelines				http://seer.upf.br/index.php/rtee/about/submissions#authorGuidelines											Yes				1993	PDF	economics, environment, urban planning	Portuguese	http://seer.upf.br/index.php/rtee/about/editorialTeam	Blind peer review	http://seer.upf.br/index.php/rtee/about/editorialPolicies#peerReviewProcess	http://seer.upf.br/index.php/rtee/about/editorialPolicies#focusAndScope	http://seer.upf.br/index.php/rtee/about/submissions#authorGuidelines			15	http://seer.upf.br/index.php/rtee/about/editorialPolicies#openAccessPolicy			Publisher's own license	Attribution, Share Alike	http://seer.upf.br/index.php/rtee/about/submissions#copyrightNotice	Yes	Diadorim	False
Cultura Agronômica	http://ojs.unesp.br/index.php/rculturaagronomica/index	Cultura Agronômica: Revista de Ciências Agronômicas	0104-1010	2446-8355	Universidade Estadual Paulista Júlio de Mesquita Filho (UNESP)	UNESP - Campus de Ilha Solteira	Open Journal System/OJS	Brazil	Yes	http://ojs.unesp.br/index.php/rculturaagronomica/about/submissions#authorFees	200	BRL - Brazilian Real		http://ojs.unesp.br/index.php/rculturaagronomica/about/submissions#authorFees										http://ojs.unesp.br/index.php/rculturaagronomica/about/editorialPolicies#archiving		index.php			2015	PDF, HTML	agricultural sciences	English, Portuguese	http://ojs.unesp.br/index.php/rculturaagronomica/about/editorialTeam	Double blind peer review	http://ojs.unesp.br/index.php/rculturaagronomica/about/editorialPolicies#peerReviewProcess	http://ojs.unesp.br/index.php/rculturaagronomica/about/editorialPolicies#focusAndScope	http://ojs.unesp.br/index.php/rculturaagronomica/about/submissions#authorGuidelines			24	http://ojs.unesp.br/index.php/rculturaagronomica/about/editorialPolicies#openAccessPolicy			CC BY-NC		http://ojs.unesp.br/index.php/rculturaagronomica/index	Yes		False
Revista Latino-Americana de Enfermagem	http://www.scielo.br/rlae		0104-1169	1518-8345	Universidade de São Paulo		SciELO Brazil	Brazil	No	http://www.scielo.br/revistas/rlae/iinstruc.htm			Yes	http://www.scielo.br/revistas/rlae/iinstruc.htm	300	BRL - Brazilian Real								http://www.scielo.br/revistas/rlae/iinstruc.htm	Yes	DOI	Yes	http://www.scielo.br/statjournal.php?lang=en&issn=0104-1169	1993	PDF, HTML, XML	health sciences	English, Portuguese, Spanish; Castilian	http://www.scielo.br/revistas/rlae/iedboard.htm	Double blind peer review	http://www.scielo.br/revistas/rlae/iinstruc.htm	http://www.scielo.br/revistas/rlae/iinstruc.htm	http://www.scielo.br/revistas/rlae/iinstruc.htm			11	http://www.scielo.br/revistas/rlae/isubscrp.htm	Yes	http://www.scielo.br/scielo.php?script=sci_arttext&pid=S0104-11692015000601000&lng=en&nrm=iso&tlng=pt	CC BY		http://www.scielo.br/revistas/rlae/isubscrp.htm	Yes		False
Journal of Human Growth and Development	http://www.journals.usp.br/jhgd	Journal of Human Growth and Development	0104-1282	2175-3598	Universidade de São Paulo		OJS	Brazil	No	http://www.revistas.usp.br/jhgd/about/submissions#authorGuidelines				http://www.revistas.usp.br/jhgd/about/submissions#authorGuidelines							LOCKSS			https://thekeepers.org/purl/issn/0104-1282		DOI	Yes	http://www.scopus.com/source/sourceInfo.uri?sourceId=5700160666&origin=resultslist	1991	PDF	human growth, child development, adolescence	English, Portuguese	http://www.revistas.usp.br/jhgd/about/editorialTeam	Open peer review	http://www.revistas.usp.br/jhgd/about/editorialPolicies#peerReviewProcess	http://www.revistas.usp.br/jhgd/about/editorialPolicies#focusAndScope	http://www.revistas.usp.br/jhgd/about/submissions#authorGuidelines	Yes	http://www.revistas.usp.br/jhgd/about/submissions#authorGuidelines	22	http://www.revistas.usp.br/jhgd/about/editorialPolicies#openAccessPolicy			Publisher's own license	Share Alike, No Commercial Usage, No Derivatives	http://www.revistas.usp.br/jhgd/about/submissions#authorGuidelines	Yes		False
Saúde e Sociedade	http://www.scielo.br/scielo.php?script=sci_serial&pid=0104-1290&lng=pt&nrm=iso		0104-1290	1984-0470	Universidade de São Paulo		SciELO Brazil	Brazil	No	http://www.scielo.br/revistas/sausoc/iinstruc.htm				http://www.scielo.br/revistas/sausoc/iinstruc.htm										http://www.scielo.br/revistas/sausoc/iinstruc.htm	Yes				1992	PDF, HTML, XML	health practices, public health	English, Portuguese	http://www.scielo.br/revistas/sausoc/iedboard.htm	Peer review	http://www.scielo.br/revistas/sausoc/iinstruc.htm	http://www.scielo.br/revistas/sausoc/iinstruc.htm	http://www.scielo.br/revistas/sausoc/iinstruc.htm			12	http://www.scielo.br/revistas/sausoc/isubscrp.htm	Yes	http://www.scielo.br/scielo.php?script=sci_arttext&pid=S0104-12902015000300765&lng=en&nrm=iso&tlng=pt	CC BY-NC		http://www.scielo.br/scielo.php?script=sci_serial&pid=0104-1290&lng=pt&nrm=iso	Yes		False
Revista Investigações	http://periodicos.ufpe.br/revistas/INV	Investigações	0104-1320	2175-294X	Universidade Federal de Pernambuco	Universidade Federal de Pernambuco	OJS	Brazil	No	http://periodicos.ufpe.br/revistas/INV/about/editorialPolicies#custom-0				http://periodicos.ufpe.br/revistas/INV/about/editorialPolicies#custom-0										http://periodicos.ufpe.br/revistas/INV/about/editorialPolicies#archiving	Yes				1991	PDF	linguistics, literature, translation	Portuguese	http://periodicos.ufpe.br/revistas/INV/about/editorialTeam	Blind peer review	http://periodicos.ufpe.br/revistas/INV/about/editorialPolicies#peerReviewProcess	http://periodicos.ufpe.br/revistas/INV/about/editorialPolicies#focusAndScope	http://periodicos.ufpe.br/revistas/INV/about/submissions#authorGuidelines			24	http://periodicos.ufpe.br/revistas/INV/about/editorialPolicies#openAccessPolicy	Yes	https://periodicos.ufpe.br/revistas/INV/article/view/1532	CC BY		http://periodicos.ufpe.br/revistas/INV/about/editorialPolicies#custom-1	Yes	Diadorim	True
Polímeros	http://www.scielo.br/scielo.php/script_sci_serial/pid_0104-1428/lng_pt/nrm_iso		0104-1428	1678-5169	Associação Brasileira de Polímeros		SciELO Brazil	Brazil	No	http://www.scielo.br/revistas/po/iinstruc.htm				http://www.scielo.br/revistas/po/iinstruc.htm											Yes	DOI	Yes	http://www.scielo.br/statjournal.php?lang=en&issn=0104-1428	1997	PDF, HTML, XML	technology, marketing, polymers	English, Portuguese	http://www.scielo.br/revistas/po/iedboard.htm	Peer review	http://www.scielo.br/revistas/po/iinstruc.htm	http://www.scielo.br/revistas/po/iinstruc.htm	http://www.scielo.br/revistas/po/iinstruc.htm			40	http://www.scielo.br/revistas/po/isubscrp.htm	Yes	http://www.scielo.br/scielo.php?script=sci_arttext&pid=S0104-14282015000100007&lng=en&nrm=iso&tlng=en	CC BY		http://www.scielo.br/scielo.php/script_sci_serial/pid_0104-1428/lng_pt/nrm_iso	Yes		False
Anos 90	http://seer.ufrgs.br/index.php/anos90		0104-236X	1983-201X	Universidade Federal do Rio Grande do Sul	Universidade Federal do Rio Grande do Sul, Programa de Pós-Graduação em História	SEER	Brazil	No	http://seer.ufrgs.br/index.php/anos90/about/editorialPolicies#openAccessPolicy				http://seer.ufrgs.br/index.php/anos90/about/editorialPolicies#openAccessPolicy									Cariniana Network	http://seer.ufrgs.br/index.php/anos90/about/editorialPolicies#archiving	Yes				1993	PDF	history, brazil, latin america	Portuguese, Spanish; Castilian	http://seer.ufrgs.br/index.php/anos90/about/editorialTeam	Double blind peer review	http://seer.ufrgs.br/index.php/anos90/about/editorialPolicies#peerReviewProcess	http://seer.ufrgs.br/index.php/anos90/about/editorialPolicies#focusAndScope	http://seer.ufrgs.br/index.php/anos90/about/submissions#onlineSubmissions			25	http://seer.ufrgs.br/index.php/anos90/about/editorialPolicies#openAccessPolicy			CC BY		http://seer.ufrgs.br/index.php/anos90/about/editorialPolicies#openAccessPolicy	Yes		False
Educação em Foco	https://educacaoemfoco.ufjf.emnuvens.com.br/		0104-3293	2447-5246	Universidade Federal de Juiz de Fora	Universidade Federal de Juiz de Fora, Faculdade de Educação	OJS	Brazil	No	https://educacaoemfoco.ufjf.emnuvens.com.br/edufoco/about/submissions#authorGuidelines				https://educacaoemfoco.ufjf.emnuvens.com.br/edufoco/about/submissions#authorGuidelines										https://educacaoemfoco.ufjf.emnuvens.com.br/edufoco/about/editorialPolicies#archiving					2015	PDF	education, teaching, school, children	Portuguese, Spanish; Castilian	https://educacaoemfoco.ufjf.emnuvens.com.br/edufoco/about/editorialPolicies#custom-2	Peer review	https://educacaoemfoco.ufjf.emnuvens.com.br/edufoco/about/editorialPolicies#peerReviewProcess	https://educacaoemfoco.ufjf.emnuvens.com.br/edufoco/about/editorialPolicies#focusAndScope	https://educacaoemfoco.ufjf.emnuvens.com.br/edufoco/about/submissions#authorGuidelines			24	https://educacaoemfoco.ufjf.emnuvens.com.br/edufoco/index			CC BY-NC		https://educacaoemfoco.ufjf.emnuvens.com.br		Diadorim	False
Revista da Faculdade de Direito UFPR	http://ojs.c3sl.ufpr.br/ojs/index.php/direito/index		0104-3315	2236-7284	Universidade Federal do Paraná	Universidade Federal do Paraná, Faculdade de Direito	OJS	Brazil	No															http://ojs.c3sl.ufpr.br/ojs/index.php/direito/about/editorialPolicies#openAccessPolicy	Yes				1953	PDF	Brazilian legal culture, law	Portuguese	http://ojs.c3sl.ufpr.br/ojs2/index.php/direito/about/editorialTeam	Double blind peer review	http://ojs.c3sl.ufpr.br/ojs2/index.php/direito/about/editorialPolicies#peerReviewProcess	http://ojs.c3sl.ufpr.br/ojs2/index.php/direito/about/editorialPolicies#focusAndScope	http://ojs.c3sl.ufpr.br/ojs2/index.php/direito/about/submissions#authorGuidelines		http://ojs.c3sl.ufpr.br/ojs2/index.php/direito/about/submissions#authorGuidelines	12	http://ojs.c3sl.ufpr.br/ojs2/index.php/direito/about/editorialPolicies#openAccessPolicy			CC BY		http://ojs.c3sl.ufpr.br/ojs/index.php/direito/about/submissions#copyrightNotice	Yes		False
Ensino em Re-vista	http://www.seer.ufu.br/index.php/emrevista		0104-3757	1983-1730	Universidade Federal de Uberlândia	Universidade Federal de Uberlândia, Faculdade de Educação	OJS	Brazil	No	http://www.seer.ufu.br/index.php/emrevista/about/submissions#authorGuidelines				http://www.seer.ufu.br/index.php/emrevista/about/submissions#authorGuidelines										http://www.seer.ufu.br/index.php/emrevista	Yes				1992	PDF	pedagogy, pedagogical processes, learning-teaching, education	English, French, Portuguese, Spanish; Castilian	http://www.seer.ufu.br/index.php/emrevista/about/editorialTeam	Blind peer review	http://www.seer.ufu.br/index.php/emrevista/about/editorialPolicies#peerReviewProcess	http://www.seer.ufu.br/index.php/emrevista/about/editorialPolicies#focusAndScope	http://www.seer.ufu.br/index.php/emrevista/about/submissions#authorGuidelines			24	http://www.seer.ufu.br/index.php/emrevista/about/editorialPolicies#openAccessPolicy			CC BY-NC-ND		http://www.seer.ufu.br/index.php/emrevista/about/editorialPolicies#openAccessPolicy	Yes		True
Ensaio	http://www.scielo.br/scielo.php?script=sci_serial&pid=0104-4036&lng=en&nrm=iso		0104-4036		Fundação CESGRANRIO		SciELO Brazil	Brazil	No	http://www.scielo.br/revistas/ensaio/iinstruc.htm				http://www.scielo.br/revistas/ensaio/iinstruc.htm											Yes	DOI			2004	PDF, HTML, XML	educational management, higher education	English, Portuguese, Spanish; Castilian	http://www.scielo.br/revistas/ensaio/pedboard.htm	Double blind peer review	http://www.scielo.br/revistas/ensaio/iinstruc.htm	http://www.scielo.br/scielo.php?script=sci_serial&pid=0104-4036&lng=en&nrm=iso	http://www.scielo.br/revistas/ensaio/iinstruc.htm			52	http://www.scielo.br/revistas/ensaio/isubscrp.htm	Yes	http://www.scielo.br/scielo.php?script=sci_arttext&pid=S0104-40362015000300593&lng=en&nrm=iso&tlng=en	CC BY-NC		http://www.scielo.br/revistas/ensaio/paboutj.htm	Yes		False
Educar em Revista	http://ojs.c3sl.ufpr.br/ojs2/index.php/educar/issue/view/2010		0104-4060		Universidade Federal do Paraná	Universidade Federal do Paraná	OJS	Brazil	No	http://ojs.c3sl.ufpr.br/ojs2/index.php/educar/about/editorialPolicies#custom-1				http://ojs.c3sl.ufpr.br/ojs2/index.php/educar/about/editorialPolicies#custom-1							CLOCKSS			http://thekeepers.org/purl/issn/1984-0411	Yes	DOI			2006	PDF, ePDF	administration, planning, teaching, learning	English, French, Portuguese, Spanish; Castilian	http://ojs.c3sl.ufpr.br/ojs2/index.php/educar/about/editorialTeam	Double blind peer review	http://ojs.c3sl.ufpr.br/ojs2/index.php/educar/about/editorialPolicies#peerReviewProcess	http://ojs.c3sl.ufpr.br/ojs2/index.php/educar/about/editorialPolicies#focusAndScope	http://ojs.c3sl.ufpr.br/ojs2/index.php/educar/about/submissions#authorGuidelines			3	http://ojs.c3sl.ufpr.br/ojs2/index.php/educar/about/editorialPolicies#openAccessPolicy			CC BY		http://ojs.c3sl.ufpr.br/ojs2/index.php/educar/about/editorialPolicies#openAccessPolicy	Yes		True
Revista da Associação Médica Brasileira	http://www.scielo.br/scielo.php/script_sci_serial/pid_0104-4230/lng_pt/nrm_iso		0104-4230	1806-9282	Associação Médica Brasileira		SciELO Brazil	Brazil	No	http://www.scielo.br/revistas/ramb/iinstruc.htm#001				http://www.scielo.br/revistas/ramb/iinstruc.htm#001										http://www.scielo.br/revistas/ramb/iinstruc.htm	Yes				1997	PDF, HTML, XML	health sciences	English, Portuguese, Spanish; Castilian	http://www.scielo.br/revistas/ramb/iedboard.htm	Peer review	http://www.scielo.br/revistas/ramb/iinstruc.htm	http://www.scielo.br/revistas/ramb/iinstruc.htm	http://www.scielo.br/revistas/ramb/iinstruc.htm			12	http://www.scielo.br/revistas/ramb/isubscrp.htm	Yes	http://www.scielo.br/scielo.php?script=sci_arttext&pid=S0104-42302015000300220&lng=en&nrm=iso&tlng=en	CC BY-NC		http://www.scielo.br/scielo.php/script_sci_serial/pid_0104-4230/lng_pt/nrm_iso	Yes		False
Roteiro	http://editora.unoesc.edu.br/index.php/roteiro/index		0104-4311	2177-6059	Universidade do Oeste de Santa Catarina		OJS	Brazil	No	http://editora.unoesc.edu.br/index.php/roteiro/about/submissions#authorGuidelines				http://editora.unoesc.edu.br/index.php/roteiro/about/submissions#authorGuidelines							LOCKSS			http://editora.unoesc.edu.br/index.php/roteiro/about/editorialPolicies#archiving					2005	PDF, XML	humanities, education, public policy	Portuguese, Spanish; Castilian	http://editora.unoesc.edu.br/index.php/roteiro/about/displayMembership/49	Double blind peer review	http://editora.unoesc.edu.br/index.php/roteiro/about/editorialPolicies#peerReviewProcess	http://editora.unoesc.edu.br/index.php/roteiro/about/editorialPolicies#focusAndScope	http://editora.unoesc.edu.br/index.php/roteiro/about/submissions#authorGuidelines			12	http://editora.unoesc.edu.br/index.php/roteiro/about/editorialPolicies#openAccessPolicy	Yes	http://editora.unoesc.edu.br/index.php/roteiro/article/view/7225	CC BY-NC		http://editora.unoesc.edu.br/index.php/roteiro/about/submissions#copyrightNotice	Yes	Diadorim	True
Revista de Sociologia e Política	http://www.scielo.br/rsocp		0104-4478	1678-9873	Universidade Federal do Paraná		SciELO Brazil	Brazil	No	http://www.scielo.br/revistas/rsocp/iinstruc.htm#0011				http://www.scielo.br/revistas/rsocp/iinstruc.htm#0011										http://www.scielo.br/revistas/rsocp/iinstruc.htm	Yes				1999	PDF, HTML, XML	political sociology, political science	English, Portuguese, Spanish; Castilian	http://www.scielo.br/revistas/rsocp/iedboard.htm	Blind peer review	http://www.scielo.br/revistas/rsocp/iinstruc.htm	http://www.scielo.br/revistas/rsocp/iinstruc.htm	http://www.scielo.br/revistas/rsocp/iinstruc.htm			16	http://www.scielo.br/revistas/rsocp/isubscrp.htm	Yes	http://www.scielo.br/scielo.php?script=sci_arttext&pid=S0104-44782015000200021&lng=en&nrm=iso&tlng=pt	CC BY-NC		http://www.scielo.br/scielo.php?script=sci_serial&pid=0104-4478&lng=en&nrm=iso	Yes		False
[truncated: 11,950 more rows]
[truncated: 7 more columns]

## Sheet: Total
Journal article processing charges (APCs)	(Alle)
Journal article submission fee	(Alle)
Digital archiving policy or program(s)	(Alle)
Full text formats	(Alle)
Journal license	(Alle)
DOAJ Seal	(Alle)
Antall av Journal title
12350

## Sheet: Scholarly field - full list
Radetiketter	Antall av Journal title
Agriculture	53
Agriculture | Geography. Anthropology. Recreation: Environmental sciences	8
Agriculture | Medicine: Therapeutics. Pharmacology	1
Agriculture | Science	5
Agriculture | Science: Biology (General)	5
Agriculture | Science: Biology (General): Ecology	1
Agriculture | Science: Botany	4
Agriculture | Social Sciences	2
[truncated: 2,147 more rows]

## Sheet: PlanS compliant
Journal article processing charges (APCs)	(Alle)
[truncated: 7 more rows]

## Sheet: Publisher size statistics
Publisher size	Number of Publisher		Publisher size	Number of Publisher	Numvber of journals	Size group		Size	No of publishers	No of journals	Percentage of publishers	Percentage of journals
[truncated: 52 more rows]

[truncated: 12 more sheets: Publishers, Licenses, Archiving, Archiving other, Total per publsize og antall OK, Review, Fields, Per field, size, APC, Total per APC og antall OK, Policy, Technical, Massaged data]
